# Supplementary material for: SETBP1 mutation determines sensitivity to immune checkpoint inhibitors in melanoma and NSCLC
Source: Aging (Albany NY). 2023 Aug 2;15(15):7476–95. doi: 10.18632/aging.204913 (PMC10457048; doi:10.18632/aging.204913)
Supplement: Supplementary Table 1 [file aging-15-204913-s002.xlsx]

## Sheet: Table S1
Supplementary Table 1. Mutational activities of extracted 4 mutational signatures in the integrated melanoma cohort.
Sample ID	Signature 1	Signature 4	Signature 7	Signature 11
CR0095_T_N	0.00751452	0.0691947	0.799856	0.0192937
CR04885_T_N	1.19e-67	0.0322074	0.944151	0.0166825
CR06670_T_N	0.00382208	0.0990499	0.8486	0.0317195
CR1509_T_N	0.00665726	0.0335719	0.87345	0.0719744
CR22640_T_N	0.00106215	0.0106141	0.988324	1.73e-111
CR3665_T_N	0.0329088	0.13752	0.638983	0.108706
CR6126_T_N	0.00142268	0.0368847	0.926027	0.0299563
CR6161_T_N	0.00103296	0.0117007	0.946381	0.0295171
CR9306_T_N	0.000530324	0.0137507	0.923424	0.0564934
CR9699_T_N	0.00297249	0	0.983566	0.00830173
DFCI_MM_1-TP-NB-SM-BZRJ8-SM-BZRJC	0.0227221	0.525737	0.10557	0.13165
DFCI_MM_2-TP-NB-SM-BZRJA-SM-BZRJD	2.57e-12	0.0416639	0.910595	0.0328929
LSD0167_T_N	0.0146074	0.0280857	0.923019	0.0231516
LSD2057_T_N	0.0277488	0.0571853	0.882774	1.18e-66
LSD3484_T_N	0.0100526	0.035839	0.883803	0.0545712
LSD4744_T_N	0.00746024	0.0258605	0.920243	0.0382736
LSD6819_T_N	0.00843637	0.0363426	0.867647	0.0875739
MEL-582186-TP-NB-SM-CN21Q-SM-CJP7T	0.0110638	0.16602	0.767286	0.0451293
MEL-587761-TP-NB-SM-CN1ZV-SM-CJP7Q	0.00762575	0.101489	0.823636	0.0442834
MEL-650366-TP-NB-SM-CN221-SM-CJP7U	0.0281351	0.0947185	0.838958	0.000332314
MEL-682321-TP-NB-SM-CN21G-SM-CJP7S	3.21e-22	0.0474905	0.893494	0.046149
MEL-IPI_Pat02-TP-NB-SM-4DJZX-SM-4NFU4	0.0166873	0.123451	0.75924	0.0676859
MEL-IPI_Pat03-TP-NB-SM-4DJZY-SM-4NFU5	0.00225533	0.0150195	0.189523	0.787503
MEL-IPI_Pat04-TP-NB-SM-4DJZZ-SM-4NFU6	0	0.239669	0.403649	0.161075
MEL-IPI_Pat06-TP-NB-SM-4DK12-SM-4NFU8	0.0263497	0.0949091	0.812841	0.0144181
MEL-IPI_Pat07-TP-NB-SM-4DK13-SM-4NFU9	0	0.318951	0.438273	0.137739
MEL-IPI_Pat08-TP-NB-SM-4DK14-SM-4NFUA	0.00465296	0.0326856	0.940331	2.24e-128
MEL-IPI_Pat100-TP-NT-SM-53U2D-SM-53U4M	0.0468267	0.0547045	0.83906	0.0513561
MEL-IPI_Pat101-TP-NT-SM-4CU6O-SM-53U4N	0.1877	0.449752	0.250187	0.0801504
MEL-IPI_Pat103-TP-NT-SM-4CU6Q-SM-53U4P	0.00825458	0.00947717	0.958178	0.00361942
MEL-IPI_Pat104-TP-NT-SM-4CU6R-SM-53U4Q	0.385761	0.190294	0.39392	0.018311
MEL-IPI_Pat105-TP-NT-SM-4CU6S-SM-53U4R	0.0173578	0.0850315	0.776983	0.0864961
MEL-IPI_Pat106-TP-NT-SM-4CU6T-SM-4MGPK	0.637024	0.083816	0.0360391	0.0929375
MEL-IPI_Pat110-TP-NT-SM-4CU6X-SM-4MGPO	2.61e-298	0.00755631	0.991053	6.13e-24
MEL-IPI_Pat111-TP-NT-SM-4CU6Y-SM-4MGPP	7.94e-289	0.121497	0.832317	0.046186
MEL-IPI_Pat113-TP-NT-SM-53U2Q-SM-4MGPR	0.0326217	0.0956317	0.827324	1.88e-63
MEL-IPI_Pat115-TP-NT-SM-5X2QS-SM-5X2RA	0.153476	0.247329	0.405644	0.177297
MEL-IPI_Pat117-TP-NT-SM-5X2QU-SM-5X2RC	0.00703869	0.015055	0.922545	0.0546064
MEL-IPI_Pat118-TP-NT-SM-5X2QV-SM-5X2RD	0.0452391	0.0639324	0.714583	0.0585679
MEL-IPI_Pat119-TP-NT-SM-7459N-SM-7459Q	0.0238183	0.230367	0.652145	0.0695742
MEL-IPI_Pat11-TP-NB-SM-4DK17-SM-4NFUD	0.000381284	1.51e-225	0.952111	0.0475078
MEL-IPI_Pat121-TP-NT-SM-7459K-SM-5X2RG	0.271334	0.293605	0.188916	0.223697
MEL-IPI_Pat123-TP-NB-SM-5X2R1-SM-5VWHL	0.0294055	0.0564825	0.850012	0.0354357
MEL-IPI_Pat124-TP-NB-SM-7459L-SM-5VWHM	0.0155767	0.0525537	0.849759	0.04465
MEL-IPI_Pat126-TP-NB-SM-5X2R4-SM-5VWHO	0.0181607	0.14797	0.732245	0.0903583
MEL-IPI_Pat127-TP-NB-SM-5X2R5-SM-5VWHP	0.0836727	0.174933	0.636284	0.0684542
MEL-IPI_Pat128-TP-NB-SM-5X2R6-SM-5VWHQ	0.0303191	0.265051	0.585235	0.0701485
MEL-IPI_Pat129-TP-NT-SM-5X2R7-SM-5X2RI	0.122925	0.0442277	0.707072	0.075159
MEL-IPI_Pat12-TP-NB-SM-7459O-SM-4NFUE	0.0569324	0.0527191	0.884921	2.51e-142
MEL-IPI_Pat132-TP-NB-SM-5VWJA-SM-5VWHR	0	3.78e-94	0.0722886	0.925275
MEL-IPI_Pat133-TP-NB-SM-7A14Z-SM-5VWHS	0.0672113	0.39327	0.216696	0.136712
MEL-IPI_Pat134-TP-NB-SM-5VWJC-SM-5VWHT	0.014545	0.0343814	0.933824	0.000659151
MEL-IPI_Pat135-TP-NB-SM-7A152-SM-5VWHU	0.0338352	0.103468	0.708971	0.13877
MEL-IPI_Pat138-TP-NB-SM-7A155-SM-5VWHX	1.53e-10	0.0049601	0.148189	0.812429
MEL-IPI_Pat139-TP-NB-SM-5VWJH-SM-5VWHY	0.00895701	0	0.966287	0.0214538
MEL-IPI_Pat13-TP-NB-SM-4DK19-SM-4NFUF	0.0402234	0.127189	0.70357	0.104892
MEL-IPI_Pat140-TP-NB-SM-5VWJI-SM-5VWHZ	0.0214642	0.047793	0.901782	0.0175795
MEL-IPI_Pat143-TP-NB-SM-7A156-SM-5VWI3	0.0382262	0.090629	0.781254	0.0537593
MEL-IPI_Pat144-TP-NB-SM-7A157-SM-5VWI4	0.141652	0.0910502	0.681287	0.0623527
MEL-IPI_Pat147-TP-NB-SM-7A158-SM-5VWI7	0.0571011	0.0308211	0.824708	0.0859626
MEL-IPI_Pat148-TP-NB-SM-5VWJQ-SM-5VWI8	0.0202524	0.112956	0.853574	0.00229254
MEL-IPI_Pat14-TP-NB-SM-53U3C-SM-4NFUG	0.191752	0.514018	6.91691904177745e-323	0.271219
MEL-IPI_Pat151-TP-NB-SM-7A15A-SM-5VWIB	0.00504101	4.52e-05	0.0385526	0.907544
MEL-IPI_Pat157-TP-NB-SM-7A15B-SM-5VWIH	0.129054	0.23122	0.459221	0.166565
MEL-IPI_Pat159-TP-NB-SM-5VWK2-SM-5VWIJ	6.04e-258	0.0600278	0.899408	0.0348195
MEL-IPI_Pat15-TP-NB-SM-4DK1B-SM-4NFUH	6.48e-128	0.0972834	0.726154	0.105144
MEL-IPI_Pat160-TP-NB-SM-5VWK3-SM-5VWIK	0.115041	0.714839	7.90505033345994e-323	0.050976
MEL-IPI_Pat162-TP-NB-SM-7A15D-SM-5VWIM	0.386321	0.374564	5.6e-38	0.157289
MEL-IPI_Pat163-TP-NB-SM-5VWK6-SM-5VWIN	0.00300992	0.151382	0.521834	0.288911
MEL-IPI_Pat166-TP-NB-SM-7A15G-SM-5VWIQ	0.848842	1.48219693752374e-323	2.32e-129	0.151158
MEL-IPI_Pat167-TP-NB-SM-7A15H-SM-5VWIR	0.256176	0.36963	0.0640503	0.136515
MEL-IPI_Pat168-TP-NB-SM-5VOAX-SM-5VWIS	0.0377188	0.333144	0.559999	0.0556528
MEL-IPI_Pat16-TP-NT-SM-53U3E-SM-53U5B	0.00336514	0.0354813	0.946534	0.00819065
MEL-IPI_Pat170-TP-NB-SM-5VOAZ-SM-5VWIU	0.0207145	0.0939907	0.86056	0.000175089
MEL-IPI_Pat171-TP-NB-SM-7A15J-SM-5VWIV	1.53e-157	0.669549	2.47e-44	0.209447
MEL-IPI_Pat174-TP-NB-SM-5VOB4-SM-5VWIY	0.00406139	0.0169026	0.970432	0.00860449
MEL-IPI_Pat175-TP-NB-SM-7A15L-SM-5VWIZ	0.125558	0.28121	0.330853	0.216652
MEL-IPI_Pat17-TP-NB-SM-4DK1D-SM-4NFUJ	0.00684101	0.0459583	0.921365	4.11e-98
MEL-IPI_Pat18-TP-NT-SM-4DK1E-SM-53U5D	0.313145	0.432255	0.0104242	0.0952628
MEL-IPI_Pat21-TP-NT-SM-4DK1H-SM-53U5G	9.34e-103	0.00541399	0.96053	0.0309766
MEL-IPI_Pat24-TP-NT-SM-4DK1K-SM-53U5J	0.346504	0.356435	0.0404395	0.119026
MEL-IPI_Pat27-TP-NB-SM-4DK1N-SM-4NFUT	0.265767	0.281382	0.289102	0.132099
MEL-IPI_Pat32-TP-NT-SM-53U3T-SM-53U67	0.0333937	0.0353035	0.901932	0.0124618
MEL-IPI_Pat39-TP-NB-SM-4DK1Z-SM-4NFV6	0.198352	0.236096	0.486436	0.0330345
MEL-IPI_Pat41-TP-NT-SM-4DK22-SM-53U5O	0.0282691	0.0096593	0.938636	0.0163131
MEL-IPI_Pat43-TP-NB-SM-4DK24-SM-4NFVA	0.16087	0.157083	0.290115	0.11474
MEL-IPI_Pat45-TP-NT-SM-4DK26-SM-53U5R	0.00946383	5.72e-150	0.97334	0.0118582
MEL-IPI_Pat46-TP-NT-SM-53U48-SM-53U5S	0.0783426	0.0919891	0.754886	0.0603185
MEL-IPI_Pat47-TP-NT-SM-4DK28-SM-53U5U	0.035524	0.160213	0.689143	0.0568168
MEL-IPI_Pat49-TP-NT-SM-4DK2A-SM-53U5W	0.0132942	0.0210077	0.925448	0.0370783
MEL-IPI_Pat50-TP-NT-SM-53U69-SM-53U5X	0.0183213	0.0138075	0.881024	0.0688789
MEL-IPI_Pat52-TP-NT-SM-4DK2D-SM-53U5Z	0	0.0788044	0.91769	4.12e-105
MEL-IPI_Pat54-TP-NB-SM-4DK2F-SM-4NFVL	0.00747471	0.0172154	0.913907	0.0568724
MEL-IPI_Pat55-TP-NB-SM-4DK2G-SM-4NFVM	0.0231216	0.08329	0.779309	0.09434
MEL-IPI_Pat56-TP-NB-SM-4DK2H-SM-4NFVN	0.150186	0.447166	0.0566931	0.119642
MEL-IPI_Pat57-TP-NB-SM-4DK2I-SM-4NFVO	0.158722	0.268493	0.518804	0.0539807
MEL-IPI_Pat58-TP-NB-SM-4DK2J-SM-4NFVP	0	2.02e-277	0.0737895	0.897469
MEL-IPI_Pat59-TP-NB-SM-4DK2K-SM-4NFVQ	0.0264314	0.0260163	0.830833	0.116719
MEL-IPI_Pat60-TP-NB-SM-4DK2L-SM-4NFVR	3.49e-12	0.022479	0.903626	0.0571246
MEL-IPI_Pat61-TP-NB-SM-4DK2M-SM-4NFVS	0.0866673	0.429131	0.172084	0.0961317
MEL-IPI_Pat62-TP-NB-SM-4DK2N-SM-4NFVT	0.00452416	0.0183508	0.650897	0.308681
MEL-IPI_Pat64-TP-NB-SM-4DK2P-SM-4NFVV	0.00139488	0.0651718	0.919702	0.00824928
MEL-IPI_Pat66-TP-NB-SM-4DK2R-SM-4NFVX	0.0109659	0.0835306	0.88191	0.0103047
MEL-IPI_Pat67-TP-NB-SM-4DK2S-SM-4NFVY	0.113848	0.413884	0.209352	7.44e-137
MEL-IPI_Pat71-TP-NB-SM-4DK2W-SM-4NFW3	0.00213698	0.0101609	0.954185	0.0335167
MEL-IPI_Pat73-TP-NB-SM-4DK2Y-SM-4NFW5	0.0113949	0.0400195	0.773352	0.0386572
MEL-IPI_Pat74-TP-NB-SM-4DK2Z-SM-4NFW6	0.0181208	0.0166566	0.906945	0.0487198
MEL-IPI_Pat76-TP-NB-SM-4DK32-SM-4NFW8	0.0480865	0.0692329	0.805047	0.0776339
MEL-IPI_Pat77-TP-NT-SM-4DK33-SM-53U63	0.0103374	0.0357273	0.902413	0.0437464
MEL-IPI_Pat79-TP-NB-SM-53U2S-SM-4NFWB	0.034582	0.00834187	0.953468	3.33e-48
MEL-IPI_Pat80-TP-NT-SM-4DK36-SM-53U53	0.0307001	0.240029	0.054273	0.422598
MEL-IPI_Pat81-TP-NB-SM-4DK37-SM-4NFWD	0.103586	0.65732	0.184612	7.03e-134
MEL-IPI_Pat82-TP-NT-SM-4DK38-SM-53U55	0.016988	0.0556246	0.747652	0.0897293
MEL-IPI_Pat83-TP-NT-SM-53U2W-SM-53U56	0.213008	0.168664	0.589872	1.48219693752374e-323
MEL-IPI_Pat85-TP-NB-SM-53U2Y-SM-4NFWH	0.016623	0.0711082	0.887408	2.23e-12
MEL-IPI_Pat86-TP-NT-SM-4DK3C-SM-53U59	0.129463	0.165179	0.469289	0.158513
MEL-IPI_Pat87-TP-NT-SM-4DK3D-SM-53U5A	0.175015	0.539684	3.95252516672997e-323	0.187025
MEL-IPI_Pat90-TP-NB-SM-4DK3G-SM-4NFWM	0.10779	0.0150039	0.863225	5.54e-83
MEL-IPI_Pat98-TP-NT-SM-4CU6L-SM-53U4K	0.364128	0.413226	1.16e-48	0.0961028
MEL-IPI_Pat99-TP-NT-SM-4CU6M-SM-53U4L	0.414674	0.490291	1.35e-138	0.0950353
NR1867_T_N	0.0427038	0.685499	0.0604954	0.0521443
NR2137_T_N	0.00394181	2.07e-275	0.941765	0.0487286
NR3549_T_N	0.0023527	0.0608357	0.918058	1.56e-37
NR4018_T_N	0.00394853	0.061122	0.805798	0.090103
NR4045_T_N	0.00796342	0.0152489	0.930446	0.042986
NR4083_T_N	4.98e-168	0.0286717	0.930605	0.0322989
NR4631_T_N	2.97e-22	9.67e-77	0.989146	1.66e-74
NR4810_T_N	0.007446	0.0304065	0.870641	0.0500702
NR4949_T_N	3.44e-301	0.0884457	0.803674	0.0740523
NR8815_T_N	7.04e-263	0.00438623	0.957677	0.0258471
NR9445_T_N	0.00917399	0.0633501	0.803656	0.12138
NR9449_T_N	0.00204986	0.0690116	0.859136	0.0101304
NR9521_T_N	0.000436496	0.0285543	0.947457	0.0220007
NR9705_T_N	0.167176	0.278514	6.91691904177745e-323	0.117674
NR9765_T_N	0.0390665	0.182172	0.65423	0.0849831
Patient1	0.0535655	0.726446	0.119869	1.42e-59
Patient10	0.0733759	0.397605	0.192623	0.110734
Patient100	4.94065645841247e-324	0.171435	0.328285	0.092232
Patient102	0	0.0842279	0.406299	0.0351498
Patient104	0.0438119	0.672899	0.138195	0.044557
Patient105	8.89e-112	0.191834	0.325743	3.55e-26
Patient106	0.0406966	0.0720433	0.520558	0.0850956
Patient107	0.0602359	0.17311	0.31279	0.120342
Patient108	1.91e-230	0.536684	0.161627	1.1e-134
Patient11	0.0107454	0.35353	0.132634	0.0826582
Patient110	1.61e-219	0.0301757	0.453132	2.95e-124
Patient112	4.94065645841247e-324	0.0463772	0.450324	1.11e-17
Patient116	0	0.0721617	0.494668	1.8e-116
Patient117	0.0193036	0.73432	0.0109178	0
Patient118	0.0202094	0.0915425	0.478897	0.0170235
Patient119	1.05e-11	0.470119	0.245463	2.66e-200
Patient120	0	0.0361343	0.462336	0.00141465
Patient121	0.00190174	0.0716628	0.47492	0.0197198
Patient125	0.160104	0.280303	0.133559	0.0576309
Patient126	2.09e-111	0.102484	0.432046	0.0164791
Patient127	5.86e-71	0.0693484	0.458435	0.0614389
Patient13	0	0.0266273	0.488457	0.0230092
Patient130	0.0838864	0.0577247	0.446129	2.07e-86
Patient131	2.18e-202	0.0850259	0.474191	1.82e-34
Patient132	2.96e-74	0.0177458	0.502226	0.00824851
Patient133	7.13878015382653e-315	0.0357805	0.393314	0.108775
Patient134	1.46e-191	0.0867839	0.326472	0.0139384
Patient135	1.35e-248	0.0483758	0.443728	0.0307539
Patient136	0.0187377	0.061524	0.461793	2.18e-25
Patient137	0	0.0430032	0.43135	0.000910674
Patient14	0.0728071	0.474255	0.123229	1.5e-22
Patient140	2.13e-116	0.0527758	0.472953	7.87e-07
Patient141	2.6e-190	0.114069	0.38542	0.00561414
Patient142	0.099211	0.349508	0.158929	2.96439387504748e-323
Patient143	2.67e-20	0.125903	0.418802	0.0384438
Patient144	2.38e-143	0.0524921	0.468001	2.26e-15
Patient145	4.97e-208	0.076789	0.497317	0.0150331
Patient146	3.33e-206	0.0541187	0.414732	0.0446061
Patient147	2.24e-79	0.0414325	0.452857	4.14e-192
Patient148	5.04e-90	0.090755	0.418757	5.89e-11
Patient149	2.76e-05	0.0536569	0.41587	6.49e-180
Patient15	1.2e-21	0.318956	0.294911	0.0724382
Patient150	0.360014	0.289757	0.323784	6.91691904177745e-323
Patient154	0.0332318	0.0714498	0.502955	0.118828
Patient155	2.05e-251	0.0593934	0.451877	0.0322905
Patient156	0.0206775	0.0785551	0.523194	1.43e-37
Patient157	0.0049398	0.0346883	0.478456	0.0186085
Patient158	0.0553747	0.00939007	8.79e-246	0.685801
Patient159	0.126816	0.596626	6.4228533959362e-323	0.264322
Patient162	2.14e-179	0.0198837	0.49402	2.65e-43
Patient163	0.00714227	0.0320496	0.54249	0.024327
Patient165	0.0043742	0.0365624	0.513813	5.55e-20
Patient166	0.145613	0.722367	2.32e-50	0
Patient167	0	0.804096	6.91691904177745e-323	0.100159
Patient168	9.88131291682493e-324	0.0320277	0.296904	0.0321434
Patient169	0	0.0137896	0.481064	0.000109517
Patient17	2.09218652011274e-313	0.116249	0.40507	0.0298131
Patient170	0.126461	0.490832	0.0414873	0.160298
Patient172	1.35e-227	0.0442506	0.427849	0.0223415
Patient173	0.0634626	0.507883	0.14208	0.0220412
Patient179	2.78e-54	0.0824672	0.455052	0.010307
Patient18	0.0104118	0.0676077	0.443125	2.18e-104
Patient180	3.94e-266	0.0249855	0.519916	5.78e-05
Patient181	3.49e-84	0.120859	0.500698	9.26e-215
Patient182	4.99e-167	0.0926115	0.340512	0.0549746
Patient183	5.73e-297	0.0240178	0.41499	0.00424675
Patient184	0.0166911	0.0448155	0.483069	4.11e-92
Patient185	0.0193125	0.0674434	0.363483	0.056807
Patient187	0.0528197	0.0902389	0.517287	0.0623293
Patient188	0	0.303899	0.414528	0.11197
Patient189	1.98e-24	0.651304	0.136248	1.08e-72
Patient191	9.73e-200	3.69e-78	0.498242	9.35e-32
Patient192	3.75e-180	0.0377138	0.449061	0.0330607
Patient193	1.74e-42	0.0421155	0.48353	2.17e-35
Patient195	2.22e-161	0.0626002	0.450211	3.63e-37
Patient196	1.71e-284	0.00759303	0.479692	0.017876
Patient197	0.0856166	0.388098	0.1295	0.119095
Patient20	3.72e-278	0.0489142	0.412318	0.0806048
Patient200	0.0610995	0.0505712	0.256184	0.295674
Patient201	0.0707536	0.555722	0.193662	0.124884
Patient203	2.18e-184	0.706502	0.188267	7.1e-84
Patient204	2.97e-149	0.0460169	0.466601	0.0172983
Patient205	8.33e-118	0.0342414	0.493015	0.00341559
Patient206	9.89e-34	0	0.486125	6.19e-30
Patient21	2.04e-50	0.858718	2.96439387504748e-323	0.0993423
Patient22	0.0477477	0.526703	0.121989	0.0611443
Patient23	0	0.238606	0.255402	0.125327
Patient24	1.11e-130	0.111901	0.341296	0.031186
Patient25	1.95e-290	0.0397431	0.348256	0.114345
Patient27	0.0194844	0.0861535	0.421609	0.0798693
Patient30	0.0748476	0.168513	0.423049	0.0410447
Patient31	0	0.449543	0.2668	0.0682141
Patient32	0	0.0345464	0.463877	0.00104108
Patient33	6.27e-171	0.504189	2.01e-276	0.442886
Patient34	0	0.720622	2.07507571253324e-322	0.108227
Patient35	9.88131291682493e-324	0.215536	0.417777	5.02e-68
Patient36	7.38e-153	0.0712249	0.408299	8.29e-51
Patient37	8.08e-33	0.685804	6.14e-112	0.0215214
Patient38	0.135335	0.346912	0.485092	0.0326604
Patient39	0	0.811679	0.0426907	4.44e-84
Patient4	2.27432053426835e-312	0.0168238	0.486649	1.56e-147
Patient40	0.0440141	3.72e-306	9.42e-222	0.668767
Patient41	2.74e-160	8.84e-257	0.49426	6.66e-52
Patient42	6.91e-189	0.0622046	0.439725	0.0272354
Patient43	0.101856	0.608507	0.132467	0.0870562
Patient44	0	0.696258	4.29e-24	0.138713
Patient45	8.94e-104	0.107819	0.414366	7.62e-13
Patient46	6.26e-156	0.0335758	0.473645	0.0351966
Patient47	0.00474785	0.0267931	0.48732	0.0172183
Patient48	0.00797544	0.725108	0.0719677	2.43e-13
Patient49	0.0506029	0.0010214	4.94065645841247e-324	0.696432
Patient50	0	0.100666	0.477241	1.83e-32
Patient51	1.81e-183	0.0163832	0.474789	2.71e-07
Patient54	0.0120601	0.248296	0.297488	0.14621
Patient55	3.03e-99	0.0345988	0.486698	2.68e-43
Patient56	0.0655102	0.507375	2.72e-205	0.288178
Patient58	0.027557	0.216413	0.352017	1.42e-170
Patient59	0	0.0443217	0.395018	0.0551743
Patient6	0.060306	0.0138604	5.86e-258	0.691611
Patient60	0	0.0643286	0.41127	4.09e-75
Patient61	9.39e-224	0.010517	0.513719	9.19e-43
Patient62	7.34e-126	0.011447	0.497106	1.49e-81
Patient63	0.0694156	0.462975	0.152063	0.18729
Patient67	0.123003	0.458898	0.258653	1.97e-97
Patient7	0.11489	0.549862	0.181259	0.0169764
Patient72	0.0357285	0.146543	0.290212	0.0723649
Patient73	0.045529	0.340859	0.294056	0.0225544
Patient75	0.00538751	0.0315843	0.491352	6.82e-06
Patient77	0.0316153	0.0398196	0.409444	2.33e-21
Patient78	0.130696	0.521321	8.91e-75	0.185526
Patient79	8.62e-134	0.0912145	0.310141	0.173856
Patient8	4.94065645841247e-324	0.0549808	0.49325	0.0275466
Patient80	4.57e-199	0.645664	0.0727922	0.0460435
Patient82	2.36e-193	0.00863746	0.467396	0.00835522
Patient83	7.45e-241	0.122373	0.306886	0.0795128
Patient84	0.10799	0.682886	3.04e-158	0.07301
Patient86	0.025156	0.0540243	0.398538	1.15e-08
Patient87	0.0323602	0.521008	0.257006	0.0912781
Patient88	1.97626258336499e-323	0.571274	8.37e-127	0.104704
Patient9	4.84e-213	0.112928	0.375328	0.0521485
Patient94	4.94065645841247e-324	0.0468521	0.483721	1.83e-91
Patient96	1.62e-38	0.0353457	0.502196	1.78e-65
Patient98	1.11e-118	0.0731798	0.399833	3.19e-35
Patient99	0.00307356	0.0623663	0.47566	0.0052127
PR12117_T_N	0.00289294	0.0206438	0.919459	0.046108
PR4035_T_N	0	0.0447413	0.894825	0.0290711
PR4046_T_N	0.0179224	0.120274	0.797534	0.0642705
PR4077_T_N	6.11e-37	6.85e-188	0.980322	0.0149626
PR4091_T_N	0.00747536	0.0341419	0.890775	0.0422603
PR4092_T_N	2.21e-280	1.3e-251	0.136034	0.847464
pt0095	1e-193	0.0646571	0.894937	0.0265466
pt0167	0.009086	0.0883125	0.874239	0.00376384
pt0244	0.00609715	5.93e-53	0.896578	0.0816927
pt0346	0.000741959	0.0665305	0.894013	1.66e-17
pt03803	0.31819	0.108381	0.320262	0.161871
pt04885	0.00120952	0.05482	0.939522	8.29e-40
pt06670	0.00623667	0.136617	0.743415	0.0806805
Pt1	0	0.00981103	0.96605	0.0177886
Pt10	3.29e-110	0.159859	0.795031	0.00851796
pt100	1.85e-281	0.0185206	0.147663	0.830771
pt101	0	0.305955	0.479112	0.066625
pt102	0.0027587	0.0737382	0.871762	7.98e-77
pt103	0	0.328835	0.461703	0.122465
pt104	0.00880661	0.0496206	0.909955	8.69e-65
pt105	2.22e-169	0.0887222	0.813657	0.0874794
pt106	0.123473	0.405511	0.380285	1.15e-97
pt107	0	0.0093635	0.982569	2.2e-51
pt108	0.209392	0.0438313	0.653565	0.00207993
pt109	0.0233178	0.0656482	0.861711	0.0133833
Pt11	2.12e-180	0.147066	0.829461	2.3e-81
pt110	0.461111	9.38724727098368e-323	3.35964639172048e-322	3.82e-57
pt111	0.0230849	0.0702493	0.854044	0.0310851
pt112	1.3e-280	7.1e-135	0.948472	0.0515278
pt1120	0.00736453	0.079016	0.871329	0.0371159
pt11217	0.0055945	0.0439666	0.889127	0.0507235
pt113	0	0.0216464	0.976889	1.53e-65
pt114	1.53e-82	0.115077	0.857586	2.25e-42
pt115	0.132216	0.304436	0.351697	0.180075
pt116	0.00465384	0.0145982	0.944278	0.0364703
pt117	0.013206	0.0793025	0.83235	3.6e-68
pt118	0	0.232431	0.67798	0.0590552
pt119	0.276902	0.277995	0.218531	0.147781
Pt12	0.0770064	0.28096	0.421539	0.159925
pt120	0.00366277	0.0795558	0.852815	0.0489168
pt121	0	0.0502858	0.894798	0.0154561
pt122	1.95e-217	0.180338	0.756905	0.0627569
pt123	0.00650649	0.158095	0.75091	0.0632676
pt124	2.47e-84	0.399974	0.581882	1.62e-79
pt125	0.0542159	0.0863395	0.700063	0.0736935
pt126	3.68041436213148e-316	0.14515	0.775196	0.0796537
pt127	0.0172838	0.0631232	0.806463	0.105389
pt128	0.089089	0.240333	0.670578	1.4e-92
pt129	0	0.00303836	0.0882832	0.908678
pt12A	0.0772893	0.0676498	0.77736	0.066225
Pt13	0.00155038	9.87e-17	0.930322	0.0643857
pt130	2.19e-187	0.438805	0.316083	0.099511
pt131	0.0843911	0.0787407	0.672858	0.128626
pt132	1.49e-241	0.00561963	0.164702	0.798536
pt133	0	0	0.980227	0.0176627
pt134	0.0539324	0.678417	5.92878775009496e-323	0.208639
pt135	8.79e-161	0.0546894	0.916672	0.0286368
pt136	0	0.114341	0.808261	0.027567
pt137	0.00383603	0.054863	0.85248	0.0865719
pt138	0.0182746	0.234427	0.747298	1.28e-53
pt139	0	0.0864537	0.771834	0.0755106
Pt14	0	0.0196809	0.954629	0.0165652
pt140	2.17e-136	0.00386816	0.0753591	0.893517
pt141	0.0827602	0.25795	0.553623	0.0788007
pt142	5.89e-07	0.144264	0.754663	0.0793054
pt143	0	0.0579619	0.938222	4.39e-65
pt144	0.0501754	0.856442	1.96e-193	0.0371716
pt145	0.331252	0.514937	0.0396207	0.0625772
pt146	0	0.168323	0.528822	0.279151
pt147	0.163812	0.497769	0.15063	0.0761581
pt148	0.574723	0.148566	9.69e-191	0.276711
pt149	3.38e-110	0.607414	0.230409	0.0778571
pt1494	0.00691732	0.0278698	0.896462	0.0667613
Pt15	9.72e-202	0.0209092	0.921635	0.0516651
pt150	0	0.380207	0.541905	0.0551511
pt1509	0.00656493	0.0178602	0.973672	8.29e-34
pt151	0	0.0595727	0.906562	1.24e-114
pt152	0.0108074	0.141193	0.842017	1.54e-101
pt153	0.00295461	0.684254	1.51e-54	0.206632
pt154	0.00899008	0.0304449	0.947908	0.0126569
pt155	0.0245841	0.355651	0.441957	0.117024
pt156	0.295303	0.509424	0.0697694	3.95252516672997e-323
pt157	0.00820524	3.85e-78	0.947542	0.0163475
pt158	0	0.0179531	0.961241	0.0191967
pt159	0.245452	0.520248	0.0627565	0.0800277
pt15C	0.13047	0.144063	0.457398	0.210131
Pt16	0.00494527	0.0318415	0.941112	0.0132548
pt160	0.231083	0.347324	0.0821981	0.0646009
pt161	0.00902179	0.415373	0.575605	4.44659081257122e-323
pt162	0.00771062	0.00701462	0.0440607	0.912204
pt163	0	0.0416936	0.734358	0.0638866
pt164	0.00662736	0.0385693	0.924714	0.00496758
pt165	0.0722158	1.13635098543487e-322	0.893912	0.0338717
pt1650	0.173332	0.66422	0	0.039944
pt166	0	0.669631	6.73e-164	0.330369
pt167	8.95e-68	0.167332	0.535331	0.195043
pt168	0.00464064	0.00355187	0.0601005	0.90506
pt169	0.0801791	0.395453	0.436409	0.0404908
pt16C	0.117469	0.146765	0.106192	0.249941
pt16D	0.133674	0.26729	0.120015	0.238376
Pt17	0.00377361	0.044446	0.929904	0.00833706
pt170	0	0.266405	0.503436	0.0832964
pt171	0	6.95e-24	0.988662	1.81e-141
pt172	0.0362259	0.187604	0.32151	0.0544712
pt173	0.0169116	0.120639	0.788807	0.0736428
pt174	0.00322932	1.56e-49	0.969821	0.02695
pt175	0.00651853	0.115409	0.843716	0.0182477
pt176	0.0310052	0.231531	0.682404	0.0223691
pt177	0.000999295	0.0295984	0.914162	0.0552399
pt178	0	0.0190769	0.910643	0.057158
pt179	0	0.0293067	0.897551	0.0663713
Pt18	0.013738	0.050217	0.922299	0.00422757
pt180	1.03e-91	0.0988073	0.742752	0.138203
pt181	0.142414	0.510087	0.100186	0.144524
pt182	0.0218584	0.359771	0.546482	0.071888
pt183	0	0.0016721	0.0853877	0.876723
pt184	3.42e-248	0.0185915	0.881187	0.100221
pt185	0	0.0288753	0.917902	0.0410657
pt186	4.86e-200	0.0357964	0.773127	0.182646
pt1867	0.105657	0.730979	7.41e-254	0.0957272
pt187	0.0121422	0.0892237	0.895893	4.69e-109
pt188	0	0.0868406	0.89151	0.0157844
pt189	0.00406978	0.0883125	0.887205	3.83e-10
pt18A	0.0135611	0.486005	0.109919	0.110571
pt18C	0.00724493	0.532729	0.104137	0.150337
Pt19	1.02e-302	0.027467	0.946313	0.00304494
pt190	4.56e-62	0.557635	0.251881	3.15e-49
pt191	0.0531857	4.06e-188	0.929297	6.21e-230
pt192	0	0.00646389	0.95593	0.0376065
pt193	0.00355577	0.0662535	0.707398	0.0862965
pt194	0.00556852	0.0243081	0.90665	0.0517727
pt195	0.0193773	0.120708	0.852768	0.00714625
pt196	0	0.0270553	0.937589	0.0300557
pt197	0	0.454342	0.545658	7.90505033345994e-323
pt198	0.00476113	2.76e-113	0.981699	1.91e-132
pt199	0.0138308	0.233866	0.0239642	0.458175
pt19D	0.114694	0.290762	0.43254	0.0671952
pt1D	0.0407291	0.307317	0.409083	0.185577
Pt2	0.00127284	0.0197143	0.960847	0.0172478
Pt20	0	0.0793509	0.8546	0.0498727
pt200	0.0937982	0.74902	0.115743	0.0141287
pt201	0.00489307	0.0158023	0.782012	0.106887
pt202	0.0616243	0.179465	0.758911	5.7e-194
pt203	3.38e-79	0.0767661	0.892248	0.012644
pt204	0.00804351	0.137259	0.664428	0.0845157
pt205	0	0.0213205	0.967252	1.79e-71
pt2051	0.109874	0.255328	0.145353	0.204307
pt2056	4.94065645841247e-324	0.0965957	0.733069	0.115703
pt2057	0.0486769	0.0933418	0.857981	3.14e-194
pt206	0.0485183	0.040316	0.896291	2.89e-237
pt207	0.0498269	0.498085	0.176277	0.12658
pt208	0.214189	0.491018	0.0108055	0.124183
pt20A	0.00143153	0.0298305	0.908001	0.0547176
pt20E	0.00325961	0.0301472	0.907556	0.0513091
Pt21	0.0194196	0.0468659	0.859108	0.0613547
pt211	0.0109262	0.0971149	0.849472	0.00208129
pt212	4.21e-282	0.2428	0.605923	0.0983519
pt213	0.146053	0.54201	0.16084	0.151097
pt2137	7.19e-186	0.00566972	0.91672	0.0690934
pt215	1.3e-184	0.0554558	0.912652	0.0193218
pt216	0.00696459	0.306555	0.647727	0.014937
pt217	0.00382952	0.0572972	0.917174	0.013706
pt218	0.0272755	0.641281	0.103894	0.0341122
pt219	0.00680265	0.0782824	0.914915	5.4e-271
pt21C	0.0106088	0.0553836	0.920057	0.01296
Pt22	0	0.0557878	0.892382	3.86e-223
pt221	0.0112561	0.128048	0.845257	6.76e-175
pt225	0.0990915	0.710809	1.29e-42	0.0882495
pt226	0.00939982	0.165627	0.812897	9.3e-159
pt22640	0.00261288	0.0362733	0.961114	4.18e-35
pt22A	2.4e-153	0.934597	0.0239939	0.0315039
pt22B	0.0817807	0.396435	3.86e-171	0.327079
Pt23	0.0112317	0.0438641	0.858411	0.0620057
pt231	0	0.0505206	0.913294	0.00588011
pt232	0	0	0	1
pt233	0.0196957	0.120563	0.587631	0.189421
pt234	0.00996352	0.143771	0.826479	0.0197866
pt235	4.94065645841247e-324	0.206671	0.704933	0.0796821
pt236	0.196402	0.602584	0.0988755	0
pt237	0.00368991	0.068288	0.875725	0.0339769
pt238	0.0994043	0.701171	7.67e-08	0.111926
pt239	0.0035603	0.0813662	0.880565	0.0142405
pt23A	0.199347	0.457642	0.140901	0.202109
Pt24	0.00316928	0.0901692	0.848845	0.0553177
pt240	0.00507232	0.154559	0.603293	0.21258
pt242	0.0117759	0.133233	0.813873	0.0166555
pt244	0.459086	0	0	0.540914
pt245	0.0338818	0.621839	0.204223	0.0381861
pt246	0.0361772	0.21005	0.569032	0.137278
pt2472	0	0.0715962	0.850564	0.0363323
pt24C	0	0.0692842	0.916492	3.72e-34
Pt25	4.94065645841247e-324	0.555015	0.329912	0.0591725
pt252	0	0.0988109	0.805615	0.0683715
pt254	0.0234883	0.0394105	0.879697	0.0574039
pt255	0.00365254	0.0381418	0.945439	0.00598999
pt256	0	0.0452939	0.887866	0.0486935
pt257	3.31e-207	0.0125914	0.953386	0.0236789
pt259	0	0.124863	0.875137	2.55e-24
pt25A	0.0734282	0.050441	0.757893	0.10872
pt25C	0.03879	0.169597	0.717804	0.0598492
Pt26	0.00154161	0.0376964	0.953596	4.95e-47
pt260	0.0128856	0.12638	0.844227	2.56e-23
pt261	0.141722	0.53063	0.210946	5.19e-26
pt262	0	8.11e-298	0.966259	0.0337406
pt266	0.000637978	0.0636614	0.862635	0.0504474
pt267	1.23e-175	0.11038	0.832448	0.0515279
pt268	0.00819849	0.045258	0.90798	0.0156688
pt26C	0	0.172433	0.799608	0.0225662
pt26E	0.00462555	0.0577905	0.898767	0.0323435
Pt27	0.00166454	0.0241086	0.956275	0.0142862
pt273	6.82e-38	1.21e-104	0.0922822	0.904709
pt274	0.00673547	0.149921	0.765998	0.042947
pt275	0.144945	0.855055	0	0
pt276	0.00166288	0.0314723	0.929789	0.0222017
pt278	0.00508669	0.0754697	0.884644	0.0115101
pt279	0.00661584	0.767047	0	0.226337
Pt28	1.07e-85	0.141085	0.79578	0.0473662
pt280	3.14e-67	0.123542	0.793491	0.0829672
pt281	2.47032822920623e-323	0.693703	0.0852461	0.119736
pt282	0.0249857	0.257751	0.569942	0.0264597
pt284	0.0141328	0.107381	0.865798	0.0126878
pt285	0.13556	0.573983	0.196379	0.0381107
pt287	0.00665812	0.036939	0.914186	0.0195144
pt28A	0.0115101	0.132359	0.737913	0.0885275
pt28D	1.04e-286	0.133241	0.707847	0.113807
Pt29	0.101695	0.748922	0.00892057	0.0972263
pt290	0.0364368	0.68383	0	0.221499
pt291	0.04558	0.0683981	0.820823	0.0543698
pt292	0.17183	0.765185	0	0.0629852
pt293	0.0150992	0.257413	0.727488	9.14e-46
pt294	0	0.187253	0.732079	0.0413848
pt295	0.00974103	0.0613584	0.879255	0.0386037
pt297	1.39e-219	0.109577	0.842568	0.0298133
pt298	0.0261951	0.24716	0.14512	0.504161
pt29C	0	0.208334	0.662165	0.0869468
pt2E	0.00804524	0.114634	0.783061	0.0942595
Pt3	0.000630726	0.0111085	0.920545	0.0575529
Pt30	8.1e-201	0.0867638	0.864236	0.0308564
pt300	0.0112754	0.0201262	0.949226	0.0193726
pt301	0.13578	0.436876	8.54733567305357e-322	0.352242
pt302	0.0148968	0.101904	0.811973	0.0661137
pt306	0.257924	0.566363	0.175713	4.5e-237
pt308	9.42e-195	1	0	0
pt3086	0.0115406	0.310551	0.425759	0.160684
pt309	0	0.766844	0.233156	1.33397724377137e-322
Pt31	0.0115544	0.0198234	0.91698	0.0465031
pt310	0	0.257103	0.735457	9.69e-32
pt311	0	0.669278	0.0720378	0.217048
pt312	0	0.367703	0.325586	2.96439387504748e-322
pt314	0.00990491	0.0536552	0.892693	0.0354382
pt3156	0	1	0	0
pt316	0.16981	0.590988	0.118002	0.1212
pt31A	0.251254	0.0234911	0.574372	0.115877
Pt32	0	0.0728425	0.923456	0.0037018
pt32A	0.414839	0.416563	6.36e-240	0.142195
Pt33	0.00547307	0.0476272	0.791206	0.147162
pt33A	0.0310435	2.95e-118	0.932897	0.0283837
pt33C	0.00813834	0.00231805	0.94874	0.037073
Pt34	0.242321	0.324856	0.0499349	0.101878
pt3484	0	0.0550702	0.912118	0.0252955
pt34A	0.0529216	0.0263843	0.835386	0.0792529
Pt35	2.28e-249	0.16565	0.766392	0.0548868
pt3549	0	0.0896334	0.901339	1.15e-83
Pt36	0.0149323	0.0163199	0.968748	1.48219693752374e-323
pt3665	0.019282	0.187216	0.613743	0.15603
Pt37	0.000630978	0.0333287	0.934329	0.0279058
pt37B	0.00626691	0.626644	3.23e-300	0.0873616
Pt38	5.21e-96	0.126619	0.726275	0.147106
pt39	0.00088006	0.0104648	0.922017	0.0533342
pt3C	0.0162787	0.133905	0.784275	0.0441057
pt3D1	0.112191	0.170157	0.595617	0.0593964
pt3D2	0.0705642	0.29808	0.375906	0.222214
Pt4	1.32e-212	0.0140934	0.955026	0.0192496
pt40	0.0186334	0.05783	0.869459	0.0428824
pt4018	4.94065645841247e-324	0.167431	0.726305	0.103938
pt4035	0	0.069819	0.88315	0.014528
pt4045	0.00763877	0.0435861	0.868279	0.0738902
pt4046	0.00649972	0.0460712	0.802665	0.128562
pt4077	0.000952822	0.00348136	0.976245	0.0193205
pt4083	0.00869026	0.0196551	0.971655	9.9e-66
pt4091	0.00583009	0.0658655	0.88581	0.0234813
pt4092	1.33e-69	0.0120255	0.28002	0.698614
pt41	0.0126874	0.14122	0.773702	0.0279971
pt41A	0.0773234	0.624558	0.0129902	0.151641
pt42	0.0206904	0.1185	0.778525	0.0722677
pt42E	0.0389579	0.154539	0.705644	0.0317892
pt45C	0.239431	0.424964	9.99e-36	0.110059
pt45E	0.0040023	0.0532238	0.920029	0.00254803
pt4631	6.03e-52	0.018973	0.972144	7.34e-94
pt4691	0	0.0617626	0.210962	0.712323
pt4744	0	0.0419695	0.912738	0.039225
pt47A	7.45e-264	0.0159788	0.939997	0.0440239
pt47D	0.00683616	0.187939	0.764624	0.0242952
pt4810	0.00172252	0.0387688	0.932528	0.0244186
pt4880	0.067954	0.321703	0.364709	0.145434
pt4941	0.179073	0.580587	1.39e-278	0.149632
pt4949	1.52e-305	0.122468	0.81391	0.0405779
pt49E	0.00306239	0.0549928	0.875563	0.0562419
pt4D	0.194769	0.237436	0.297146	0.0921218
Pt5	0.00750551	0.0920828	0.824618	0.0757938
pt5038	0	0.208684	0.730556	0.020304
pt50A	2.45e-21	0.0432002	0.91439	0.0423624
pt50C	0	0.0404323	0.921586	0.0379817
pt5118	0.15651	0.601313	1.43279037293961e-322	0.101806
pt53A	0.0206011	0.119722	0.788473	0.0699368
pt53D	2.33e-285	0.196095	0.711282	0.0660951
pt54A	0.065529	0.0630609	0.792662	0.0787477
pt54C	0.023501	0.0179282	0.826941	0.0898763
pt5784	0	0.418686	2.64e-274	0.340119
pt5934	4.56e-149	0.13074	0.720633	0.0769584
pt5A	0.0438053	0.225729	0.671166	0.0503136
Pt6	0.000993425	7.58e-68	0.967542	1.16e-130
pt6126	0	0.0586904	0.919833	0.0214768
pt6161	0	0.025574	0.961892	3.07e-31
pt6336	0	0.11067	0.757267	0.132063
pt6494	0.00183583	0.0819554	0.893174	0.0168491
pt6689	0	1	0	0
pt6721	0.0255658	0.139899	0.778029	2.47032822920623e-323
pt6819	0	0.0457924	0.894121	0.0600862
pt6842	0	3.14e-49	0	0
pt6B	0.0744563	0.280775	0.522074	0.122695
Pt7	0.0106826	0.0352169	0.933453	0.0134347
pt7357	0	0.0453176	0.954682	4.93e-77
pt7623	0.00625271	0.0611442	0.773098	0.103864
pt7A	0.326197	0.429281	0.122973	0.121549
pt7D	0.0914333	0.403573	1.33397724377137e-322	0.437811
Pt8	1.39e-116	0.036107	0.369253	0.534788
pt8815	0	0.00602403	0.965124	0.018238
Pt9	0	0.0361717	0.92505	0.0384971
pt9298	0	0.056152	0.895606	0.00956323
pt9306	0.00166135	0.0367456	0.892013	0.0590565
pt9341	0.0964862	0.107897	0.682795	0.112821
pt9445	0.00467044	0.0929486	0.780519	0.120658
pt9449	0	0.0717675	0.865571	3.65e-60
pt9521	1.06e-91	0.0433851	0.940511	0.0161035
pt9699	0.00299129	1.53e-201	0.96502	0.0246587
pt9705	0.0355136	0.564767	1.51e-135	0.150842
pt9765	0.0686341	0.236452	0.406572	0.237284
pt99	4.94065645841247e-324	0.111951	0.799091	0.0577855
pt9A	0.199819	0.326775	0.180532	0.170928
pt9C	0.181081	0.482724	0.232299	0.0315177
pt9D	0.496998	0.193484	0.189008	0.104162
SD0346_T_N	0.00255578	0.0383083	0.921204	0.00754847
SD1494_T_N	0.00947558	0.0130932	0.892042	0.0823787
SD2051_T_N	0.118338	0.183743	0.116997	0.174174
SD2056_T_N	0.0087661	0.0900717	0.71355	0.163964
SD5038_T_N	0	0.131464	0.769044	0.0552964
SD5118_T_N	0.135126	0.399849	0.0858751	0.0584551
SD5934_T_N	0.00884517	0.116721	0.769178	0.032675
SD6336_T_N	0.0253462	0.0603404	0.810686	0.101774
SD6494_T_N	0.00430376	0.0905983	0.830466	0.0431437
SD7357_T_N	4.28e-44	0.0462343	0.953766	1.02e-34
