# Supplementary material for: SETBP1 mutation determines sensitivity to immune checkpoint inhibitors in melanoma and NSCLC
Source: Aging (Albany NY). 2023 Aug 2;15(15):7476–95. doi: 10.18632/aging.204913 (PMC10457048; doi:10.18632/aging.204913)
Supplement: Supplementary Table 2 [file aging-15-204913-s003.xlsx]

## Sheet: Table S2
Supplementary Table 2. Mutational activities of extracted 3 mutational signatures in the integrated NSCLC cohort.
Sample ID	Signature 1	Signature 4	Signature 7
1	0.684688	0.121801	0.193511
2	0.396083	0.507691	0.0962255
3	2.4304e-12	1	2.4304e-12
4	0.523175	0.345971	0.130854
5	0.520603	0.227251	0.252146
6	0.53513	0.266348	0.198522
7	0.323916	0.45026	0.225824
8	0.176051	0.802069	0.0218801
9	0.541931	0.331866	0.126203
10	0.412652	0.291229	0.296118
11	0.6578	0.0994381	0.242762
12	0.115724	0.0234365	0.86084
13	0.74049	0.0814691	0.178041
14	0.355955	0.44305	0.200994
15	0.312306	0.583452	0.104242
16	0.744666	0.089583	0.165751
17	0.696144	0.303856	6.68137e-13
18	0.135517	0.646676	0.217808
19	0.0965941	0.824675	0.078731
20	0.202126	0.705931	0.0919424
21	0.266117	0.434585	0.299299
22	0.376607	0.57764	0.045753
23	0.130864	0.673759	0.195377
24	0.742139	0.0724033	0.185458
25	0.258636	0.710972	0.0303922
26	0.106682	0.78395	0.109368
27	0.321368	0.6369	0.0417317
28	0.228601	0.303267	0.468132
29	0.161195	0.71288	0.125924
30	0.319745	0.564061	0.116194
31	0.30139	0.389455	0.309155
32	0.203674	0.634047	0.162279
33	0.330314	0.571089	0.0985963
34	0.23929	0.351302	0.409408
35	0.459365	0.0569453	0.483689
36	0.217256	0.684068	0.0986753
37	0.273507	0.559014	0.16748
38	0.535332	0.397842	0.0668255
39	0.438767	0.103208	0.458025
40	0.0879815	0.310934	0.601085
41	0.164121	0.694157	0.141722
42	0.295282	0.501246	0.203472
43	0.163933	0.698814	0.137253
44	0.116431	0.202207	0.681362
45	0.213631	0.152729	0.63364
46	0.396833	0.466565	0.136602
47	0.116739	0.616204	0.267056
48	0.468418	0.106876	0.424706
49	0.189981	0.179685	0.630334
50	0.239756	0.481445	0.278799
51	0.0496995	0.651594	0.298707
52	1.58826e-14	0.244563	0.755437
53	0.147259	0.472911	0.37983
54	0.185877	0.696725	0.117398
55	0.218554	0.6979	0.0835463
56	0.352728	0.548661	0.0986107
57	0.289111	0.676647	0.0342414
58	0.289604	0.215426	0.494969
59	0.738201	0.181101	0.0806981
60	0.875522	0.0229147	0.101563
61	0.18027	0.67264	0.14709
62	0.0502481	1.63471e-15	0.949752
63	1.88622e-13	0.307834	0.692166
64	0.101527	0.663596	0.234877
65	0.280288	0.0321452	0.687567
66	0.393721	0.504204	0.102075
67	0.234034	0.247001	0.518965
68	0.122617	0.648901	0.228483
69	0.503513	0.169145	0.327341
70	0.111967	0.141294	0.746739
71	0.0607459	0.188209	0.751045
72	0.435936	0.155535	0.408529
73	0.110859	0.633938	0.255204
74	1	5.42952e-15	4.53962e-09
75	0.115399	0.298334	0.586267
AL4602	0.337945	0.5576	0.104455
AU5884	0.546206	0.404161	0.0496335
BL3403	0.725844	0.11786	0.156296
CA9903	0.228863	0.697987	0.0731493
CU9061	0.528049	0.312406	0.159545
DI6359	0.273385	0.627794	0.0988212
DM123062	0.315756	0.535172	0.149073
FR9547	0.276201	0.333681	0.390118
GR0134	0.319553	0.572283	0.108164
GR4788	0.300509	0.61936	0.0801309
HE3202	0.515179	0.302249	0.182572
JB112852	0.178772	0.673859	0.147369
KA3947	0.636235	0.363765	4.61426e-11
LO3793	0.374627	0.601842	0.0235312
LO5004	0.237896	0.540232	0.221872
M4945	0.707601	0.126011	0.166388
MA7027	0.217842	0.557721	0.224437
NI9507	0.620174	0.208616	0.17121
R7495_2	0.389473	0.491845	0.118681
RH090935	0.457829	0.481398	0.0607725
RI1933	0.410604	0.563551	0.0258445
RO3338	0.695379	0.0641427	0.240479
SA9755	0.584755	0.395056	0.0201886
SB010944	0.56417	0.118	0.31783
SC0899	0.238649	0.674425	0.0869269
SC6470	0.663636	0.236749	0.0996144
SR070761	0.329606	0.408249	0.262145
TU0428	0.78673	0.108848	0.104422
VA1330	0.232692	0.717978	0.0493292
VA7859	0.237805	0.694345	0.06785
WA7899	0.648275	0.173269	0.178456
Y2087	0.572224	0.381207	0.0465691
ZA6505	0.478359	0.26426	0.25738
ZA6965	0.745449	0.191367	0.063184
