# Supplementary material for: SETBP1 mutation determines sensitivity to immune checkpoint inhibitors in melanoma and NSCLC
Source: Aging (Albany NY). 2023 Aug 2;15(15):7476–95. doi: 10.18632/aging.204913 (PMC10457048; doi:10.18632/aging.204913)
Supplement: Supplementary Table 3 [file aging-15-204913-s004.xlsx]

## Sheet: Table S3
Supplementary Table 3. Clinical characteristics and immunotherapy information of 631 integrated melanoma samples received ICI treatment.
Sample ID	DOI	Age	Sex	Stage	Overall survival (months)	Overall survival status	Response status	Therapy target	Therapy drug	Sequencing platform
Patient1	10.1038/s41591-019-0654-5	NA	Female	M1c	9.43333	Dead	PD	CTLA-4 plus PD-1/PD-L1	Ipilimumab+Pembrolizumab	HiSeq(Illumina)
Patient10	10.1038/s41591-019-0654-5	NA	Female	M1c	37.9667	Dead	CR/PR	CTLA-4 plus PD-1/PD-L1	Ipilimumab+Pembrolizumab	HiSeq(Illumina)
Patient100	10.1038/s41591-019-0654-5	NA	Female	M1c	31.2667	Dead	CR/PR	CTLA-4 plus PD-1/PD-L1	Ipilimumab+Nivolumab	HiSeq(Illumina)
Patient104	10.1038/s41591-019-0654-5	NA	Female	M1c	26.3	Alive	CR/PR	PD-1/PD-L1	Pembrolizumab	HiSeq(Illumina)
Patient105	10.1038/s41591-019-0654-5	NA	Female	M1c	17.3667	Dead	MR	PD-1/PD-L1	Pembrolizumab	HiSeq(Illumina)
Patient106	10.1038/s41591-019-0654-5	NA	Female	M1c	26	Alive	CR/PR	PD-1/PD-L1	Pembrolizumab	HiSeq(Illumina)
Patient11	10.1038/s41591-019-0654-5	NA	Female	M1c	5.33333	Dead	PD	CTLA-4 plus PD-1/PD-L1	Ipilimumab+Pembrolizumab	HiSeq(Illumina)
Patient110	10.1038/s41591-019-0654-5	NA	Female	M1c	16.8667	Alive	PD	PD-1/PD-L1	Pembrolizumab	HiSeq(Illumina)
Patient112	10.1038/s41591-019-0654-5	NA	Female	M1c	17.3667	Dead	PD	PD-1/PD-L1	Nivolumab	HiSeq(Illumina)
Patient116	10.1038/s41591-019-0654-5	NA	Female	M1c	3.93333	Dead	PD	PD-1/PD-L1	Nivolumab	HiSeq(Illumina)
Patient117	10.1038/s41591-019-0654-5	NA	Female	M1c	9.83333	Dead	PD	CTLA-4 plus PD-1/PD-L1	Ipilimumab+Pembrolizumab	HiSeq(Illumina)
Patient118	10.1038/s41591-019-0654-5	NA	Female	M1c	43.8667	Alive	CR/PR	CTLA-4 plus PD-1/PD-L1	Ipilimumab+Pembrolizumab	HiSeq(Illumina)
Patient119	10.1038/s41591-019-0654-5	NA	Female	M1c	8.66667	Dead	PD	CTLA-4 plus PD-1/PD-L1	Ipilimumab+Pembrolizumab	HiSeq(Illumina)
Patient120	10.1038/s41591-019-0654-5	NA	Female	M1c	43.7	Alive	CR/PR	CTLA-4 plus PD-1/PD-L1	Ipilimumab+Pembrolizumab	HiSeq(Illumina)
Patient121	10.1038/s41591-019-0654-5	NA	Female	M1c	43.5333	Alive	CR/PR	CTLA-4 plus PD-1/PD-L1	Ipilimumab+Pembrolizumab	HiSeq(Illumina)
Patient130	10.1038/s41591-019-0654-5	NA	Female	M1c	6.4	Dead	PD	PD-1/PD-L1	Nivolumab	HiSeq(Illumina)
Patient137	10.1038/s41591-019-0654-5	NA	Female	M1c	25.7333	Alive	CR/PR	PD-1/PD-L1	Pembrolizumab	HiSeq(Illumina)
Patient14	10.1038/s41591-019-0654-5	NA	Female	M1b	6.2	Dead	PD	PD-1/PD-L1	Pembrolizumab	HiSeq(Illumina)
Patient141	10.1038/s41591-019-0654-5	NA	Female	M1c	29.1667	Alive	CR/PR	PD-1/PD-L1	Nivolumab	HiSeq(Illumina)
Patient142	10.1038/s41591-019-0654-5	NA	Female	M1a	33.2	Alive	SD	PD-1/PD-L1	Pembrolizumab	HiSeq(Illumina)
Patient146	10.1038/s41591-019-0654-5	NA	Female	M1c	20.4	Alive	CR/PR	PD-1/PD-L1	Pembrolizumab	HiSeq(Illumina)
Patient148	10.1038/s41591-019-0654-5	NA	Female	M1a	26.4	Alive	CR/PR	PD-1/PD-L1	Pembrolizumab	HiSeq(Illumina)
Patient15	10.1038/s41591-019-0654-5	NA	Female	M1c	4.96667	Dead	CR/PR	CTLA-4 plus PD-1/PD-L1	Ipilimumab+Pembrolizumab	HiSeq(Illumina)
Patient154	10.1038/s41591-019-0654-5	NA	Female	M0	21.1667	Alive	SD	PD-1/PD-L1	Pembrolizumab	HiSeq(Illumina)
Patient159	10.1038/s41591-019-0654-5	NA	Female	M1c	9.6	Alive	SD	CTLA-4 plus PD-1/PD-L1	Ipilimumab+Pembrolizumab	HiSeq(Illumina)
Patient166	10.1038/s41591-019-0654-5	NA	Female	M1c	6.83333	Dead	CR/PR	PD-1/PD-L1	Nivolumab	HiSeq(Illumina)
Patient167	10.1038/s41591-019-0654-5	NA	Female	M1c	9.4	Dead	PD	PD-1/PD-L1	Nivolumab	HiSeq(Illumina)
Patient173	10.1038/s41591-019-0654-5	NA	Female	M1c	1.4	Dead	PD	PD-1/PD-L1	Pembrolizumab	HiSeq(Illumina)
Patient179	10.1038/s41591-019-0654-5	NA	Female	M1b	21.7667	Alive	CR/PR	PD-1/PD-L1	Pembrolizumab	HiSeq(Illumina)
Patient181	10.1038/s41591-019-0654-5	NA	Female	M1c	15.8667	Alive	CR/PR	PD-1/PD-L1	Nivolumab	HiSeq(Illumina)
Patient182	10.1038/s41591-019-0654-5	NA	Female	M1c	24.9333	Dead	PD	PD-1/PD-L1	Nivolumab	HiSeq(Illumina)
Patient187	10.1038/s41591-019-0654-5	NA	Female	M1a	20.5667	Alive	CR/PR	CTLA-4 plus PD-1/PD-L1	Ipilimumab+Pembrolizumab	HiSeq(Illumina)
Patient189	10.1038/s41591-019-0654-5	NA	Female	M1c	23.9333	Alive	CR/PR	PD-1/PD-L1	Pembrolizumab	HiSeq(Illumina)
Patient192	10.1038/s41591-019-0654-5	NA	Female	M1c	9.66667	Alive	CR/PR	CTLA-4 plus PD-1/PD-L1	Ipilimumab+Pembrolizumab	HiSeq(Illumina)
Patient193	10.1038/s41591-019-0654-5	NA	Female	M0	21.9667	Alive	SD	PD-1/PD-L1	Pembrolizumab	HiSeq(Illumina)
Patient197	10.1038/s41591-019-0654-5	NA	Female	M1c	32	Alive	CR/PR	PD-1/PD-L1	Nivolumab	HiSeq(Illumina)
Patient20	10.1038/s41591-019-0654-5	NA	Female	M1c	8.06667	Dead	PD	CTLA-4 plus PD-1/PD-L1	Ipilimumab+Nivolumab	HiSeq(Illumina)
Patient205	10.1038/s41591-019-0654-5	NA	Female	M1c	13.0667	Dead	PD	PD-1/PD-L1	Pembrolizumab	HiSeq(Illumina)
Patient21	10.1038/s41591-019-0654-5	NA	Female	M1c	30.2	Alive	CR/PR	CTLA-4 plus PD-1/PD-L1	Ipilimumab+Pembrolizumab	HiSeq(Illumina)
Patient30	10.1038/s41591-019-0654-5	NA	Female	M1c	7.1	Dead	SD	CTLA-4 plus PD-1/PD-L1	Ipilimumab+Pembrolizumab	HiSeq(Illumina)
Patient32	10.1038/s41591-019-0654-5	NA	Female	M1c	1.76667	Dead	PD	CTLA-4 plus PD-1/PD-L1	Ipilimumab+Pembrolizumab	HiSeq(Illumina)
Patient33	10.1038/s41591-019-0654-5	NA	Female	M1c	55.9667	Alive	CR/PR	CTLA-4 plus PD-1/PD-L1	Ipilimumab+Pembrolizumab	HiSeq(Illumina)
Patient40	10.1038/s41591-019-0654-5	NA	Female	M1c	15.6	Dead	PD	PD-1/PD-L1	Nivolumab	HiSeq(Illumina)
Patient47	10.1038/s41591-019-0654-5	NA	Female	M1c	31.2333	Alive	PD	PD-1/PD-L1	Nivolumab	HiSeq(Illumina)
Patient48	10.1038/s41591-019-0654-5	NA	Female	M1c	1.76667	Dead	PD	PD-1/PD-L1	Pembrolizumab	HiSeq(Illumina)
Patient49	10.1038/s41591-019-0654-5	NA	Female	M1c	54.5	Alive	CR/PR	CTLA-4 plus PD-1/PD-L1	Ipilimumab+Nivolumab	HiSeq(Illumina)
Patient50	10.1038/s41591-019-0654-5	NA	Female	M1c	5.83333	Dead	MR	CTLA-4 plus PD-1/PD-L1	Ipilimumab+Pembrolizumab	HiSeq(Illumina)
Patient6	10.1038/s41591-019-0654-5	NA	Female	M1b	22.9	Dead	SD	CTLA-4 plus PD-1/PD-L1	Ipilimumab+Pembrolizumab	HiSeq(Illumina)
Patient61	10.1038/s41591-019-0654-5	NA	Female	M1c	32.9	Alive	SD	CTLA-4 plus PD-1/PD-L1	Ipilimumab+Nivolumab	HiSeq(Illumina)
Patient62	10.1038/s41591-019-0654-5	NA	Female	M1c	33.3667	Alive	CR/PR	CTLA-4 plus PD-1/PD-L1	Ipilimumab+Nivolumab	HiSeq(Illumina)
Patient63	10.1038/s41591-019-0654-5	NA	Female	M1c	5.93333	Dead	PD	CTLA-4 plus PD-1/PD-L1	Ipilimumab+Nivolumab	HiSeq(Illumina)
Patient67	10.1038/s41591-019-0654-5	NA	Female	M1c	4.53333	Dead	PD	PD-1/PD-L1	Nivolumab	HiSeq(Illumina)
Patient77	10.1038/s41591-019-0654-5	NA	Female	M1c	14.8	Dead	PD	PD-1/PD-L1	Pembrolizumab	HiSeq(Illumina)
Patient78	10.1038/s41591-019-0654-5	NA	Female	M1b	11.8667	Dead	PD	PD-1/PD-L1	Pembrolizumab	HiSeq(Illumina)
Patient79	10.1038/s41591-019-0654-5	NA	Female	M1c	28.3	Alive	PD	PD-1/PD-L1	Pembrolizumab	HiSeq(Illumina)
Patient84	10.1038/s41591-019-0654-5	NA	Female	M1c	5.46667	Dead	PD	CTLA-4 plus PD-1/PD-L1	Ipilimumab+Pembrolizumab	HiSeq(Illumina)
Patient87	10.1038/s41591-019-0654-5	NA	Female	M1c	42.1	Alive	CR/PR	CTLA-4 plus PD-1/PD-L1	Ipilimumab+Pembrolizumab	HiSeq(Illumina)
Patient9	10.1038/s41591-019-0654-5	NA	Female	M0	32.1	Alive	PD	PD-1/PD-L1	Nivolumab	HiSeq(Illumina)
Patient94	10.1038/s41591-019-0654-5	NA	Female	M1c	1.33333	Dead	PD	CTLA-4 plus PD-1/PD-L1	Ipilimumab+Pembrolizumab	HiSeq(Illumina)
Patient98	10.1038/s41591-019-0654-5	NA	Female	M1b	22.7667	Dead	PD	PD-1/PD-L1	Nivolumab	HiSeq(Illumina)
pt0346	10.1056/NEJMoa1406498	43	Female	M1b	35.3	Dead	CR/PR	CTLA-4	Ipilimumab/Tremelimumab	HiSeq 2000(Illumina)
pt04885	10.1056/NEJMoa1406498	49	Female	M0	25.5667	Alive	CR/PR	CTLA-4	Ipilimumab/Tremelimumab	HiSeq 2000(Illumina)
pt06670	10.1056/NEJMoa1406498	79	Female	M0	45.0333	Dead	CR/PR	CTLA-4	Ipilimumab/Tremelimumab	HiSeq 2000(Illumina)
Pt1	10.1016/j.cell.2016.02.065	66	Female	M1b	20.2333	Dead	PD	PD-1/PD-L1	Pembrolizumab/Nivolumab	HiSeq 2000(Illumina)
pt100	10.1126/science.aad0095	61	Female	M1c	3.33333	Dead	PD	CTLA-4	Ipilimumab	HiSeq 2500(Illumina)
pt108	10.1126/science.aad0095	45	Female	M1c	7.9	Dead	SD	CTLA-4	Ipilimumab	HiSeq 2500(Illumina)
pt110	10.1126/science.aad0095	43	Female	M1b	8.33333	Dead	PD	CTLA-4	Ipilimumab	HiSeq 2500(Illumina)
pt117	10.1126/science.aad0095	43	Female	M1c	10.4333	Dead	PD	CTLA-4	Ipilimumab	HiSeq 2500(Illumina)
pt120	10.1126/science.aad0095	50	Female	M1c	28.4333	Dead	SD	CTLA-4	Ipilimumab	HiSeq 2500(Illumina)
pt123	10.1126/science.aad0095	25	Female	M1c	11.0667	Dead	PD	CTLA-4	Ipilimumab	HiSeq 2500(Illumina)
Pt13	10.1016/j.cell.2016.02.065	53	Female	M1c	30.5667	Alive	CR/PR	PD-1/PD-L1	Pembrolizumab/Nivolumab	HiSeq 2000(Illumina)
pt131	10.1126/science.aad0095	29	Female	M1c	2.7	Dead	PD	CTLA-4	Ipilimumab	HiSeq 2500(Illumina)
pt132	10.1126/science.aad0095	39	Female	M1c	49.2667	Dead	SD	CTLA-4	Ipilimumab	HiSeq 2500(Illumina)
pt134	10.1126/science.aad0095	48	Female	M1c	5.43333	Dead	PD	CTLA-4	Ipilimumab	HiSeq 2500(Illumina)
pt138	10.1126/science.aad0095	35	Female	M1c	2.8	Dead	PD	CTLA-4	Ipilimumab	HiSeq 2500(Illumina)
Pt14	10.1016/j.cell.2016.02.065	27	Female	M1c	1.8	Alive	PD	PD-1/PD-L1	Pembrolizumab/Nivolumab	HiSeq 2000(Illumina)
pt141	10.1126/science.aad0095	69	Female	M1c	2.86667	Dead	SD	CTLA-4	Ipilimumab	HiSeq 2500(Illumina)
pt143	10.1126/science.aad0095	68	Female	M1b	27.0333	Dead	PD	CTLA-4	Ipilimumab	HiSeq 2500(Illumina)
pt145	10.1126/science.aad0095	55	Female	M1c	7.03333	Dead	PD	CTLA-4	Ipilimumab	HiSeq 2500(Illumina)
pt147	10.1126/science.aad0095	50	Female	M1c	3.83333	Dead	PD	CTLA-4	Ipilimumab	HiSeq 2500(Illumina)
pt1509	10.1056/NEJMoa1406498	54	Female	M1c	54.7667	Alive	CR/PR	CTLA-4	Ipilimumab/Tremelimumab	HiSeq 2000(Illumina)
pt154	10.1126/science.aad0095	57	Female	M1a	22.9333	Alive	CR/PR	CTLA-4	Ipilimumab	HiSeq 2500(Illumina)
pt155	10.1126/science.aad0095	67	Female	M1a	3	Dead	SD	CTLA-4	Ipilimumab	HiSeq 2500(Illumina)
pt156	10.1126/science.aad0095	55	Female	M0	26.6	Alive	PD	CTLA-4	Ipilimumab	HiSeq 2500(Illumina)
pt159	10.1126/science.aad0095	74	Female	M1b	32.3667	Alive	CR/PR	CTLA-4	Ipilimumab	HiSeq 2500(Illumina)
pt15C	10.1126/scitranslmed.aah3560	43	Female	NA	15.5333	Dead	PD	PD-1/PD-L1	Pembrolizumab	HiSeq 2000/2500(Illumina)
pt1650	10.1056/NEJMoa1406498	71	Female	M1c	32.8667	Dead	CR/PR	CTLA-4	Ipilimumab/Tremelimumab	HiSeq 2000(Illumina)
pt166	10.1126/science.aad0095	52	Female	M1c	1.8	Dead	PD	CTLA-4	Ipilimumab	HiSeq 2500(Illumina)
pt167	10.1126/science.aad0095	47	Female	M1c	2.33333	Dead	PD	CTLA-4	Ipilimumab	HiSeq 2500(Illumina)
pt172	10.1126/science.aad0095	75	Female	M1b	1.23333	Dead	PD	CTLA-4	Ipilimumab	HiSeq 2500(Illumina)
pt173	10.1126/science.aad0095	57	Female	M1c	9.03333	Dead	PD	CTLA-4	Ipilimumab	HiSeq 2500(Illumina)
pt175	10.1126/science.aad0095	36	Female	M1b	5.33333	Dead	PD	CTLA-4	Ipilimumab	HiSeq 2500(Illumina)
pt180	10.1126/science.aad0095	71	Female	M1c	6.43333	Dead	PD	CTLA-4	Ipilimumab	HiSeq 2500(Illumina)
pt183	10.1126/science.aad0095	59	Female	M0	21.7333	Dead	PD	CTLA-4	Ipilimumab	HiSeq 2500(Illumina)
pt189	10.1126/science.aad0095	44	Female	M0	21.7667	Alive	SD	CTLA-4	Ipilimumab	HiSeq 2500(Illumina)
pt18A	10.1126/scitranslmed.aah3560	66	Female	NA	17.9667	Dead	PD	CTLA-4 plus PD-1/PD-L1	Ipilimumab+Pembrolizumab	HiSeq 2000/2500(Illumina)
pt18C	10.1126/scitranslmed.aah3560	66	Female	NA	17.9667	Dead	PD	CTLA-4 plus PD-1/PD-L1	Ipilimumab+Pembrolizumab	HiSeq 2000/2500(Illumina)
pt197	10.1126/science.aad0095	71	Female	M1c	1.26667	Dead	PD	CTLA-4	Ipilimumab	HiSeq 2500(Illumina)
pt1D	10.1126/scitranslmed.aah3560	48	Female	NA	18.0667	Dead	PD	CTLA-4 plus PD-1/PD-L1	Ipilimumab+Pembrolizumab	HiSeq 2000/2500(Illumina)
Pt20	10.1016/j.cell.2016.02.065	63	Female	M1c	11.2333	Dead	PD	PD-1/PD-L1	Pembrolizumab/Nivolumab	HiSeq 2000(Illumina)
pt200	10.1126/science.aad0095	54	Female	M1a	20.9333	Dead	PD	CTLA-4	Ipilimumab	HiSeq 2500(Illumina)
pt201	10.1126/science.aad0095	54	Female	M1c	3.46667	Dead	PD	CTLA-4	Ipilimumab	HiSeq 2500(Illumina)
pt205	10.1126/science.aad0095	60	Female	M1c	32.9667	Alive	SD	CTLA-4	Ipilimumab	HiSeq 2500(Illumina)
pt2051	10.1056/NEJMoa1406498	61	Female	M1c	9.73333	Dead	PD	CTLA-4	Ipilimumab/Tremelimumab	HiSeq 2000(Illumina)
pt2056	10.1056/NEJMoa1406498	39	Female	M1b	47.4667	Alive	CR/PR	CTLA-4	Ipilimumab/Tremelimumab	HiSeq 2000(Illumina)
pt2057	10.1056/NEJMoa1406498	36	Female	M1c	40.1667	Alive	CR/PR	CTLA-4	Ipilimumab/Tremelimumab	HiSeq 2000(Illumina)
pt208	10.1126/science.aad0095	57	Female	M1c	4.66667	Dead	PD	CTLA-4	Ipilimumab	HiSeq 2500(Illumina)
pt22A	10.1126/scitranslmed.aah3560	50	Female	NA	20.7667	Alive	CR/PR	CTLA-4	Ipilimumab	HiSeq 2000/2500(Illumina)
pt22B	10.1126/scitranslmed.aah3560	50	Female	NA	20.7667	Alive	CR/PR	CTLA-4	Ipilimumab	HiSeq 2000/2500(Illumina)
pt25A	10.1126/scitranslmed.aah3560	46	Female	NA	29.8	Dead	PD	CTLA-4 plus PD-1/PD-L1	Ipilimumab+Pembrolizumab	HiSeq 2000/2500(Illumina)
pt25C	10.1126/scitranslmed.aah3560	46	Female	NA	29.8	Dead	PD	CTLA-4 plus PD-1/PD-L1	Ipilimumab+Pembrolizumab	HiSeq 2000/2500(Illumina)
pt26C	10.1126/scitranslmed.aah3560	60	Female	NA	41.8667	Dead	PD	CTLA-4 plus PD-1/PD-L1	Ipilimumab+Pembrolizumab	HiSeq 2000/2500(Illumina)
pt26E	10.1126/scitranslmed.aah3560	60	Female	NA	41.8667	Dead	PD	CTLA-4 plus PD-1/PD-L1	Ipilimumab+Pembrolizumab	HiSeq 2000/2500(Illumina)
Pt30	10.1016/j.cell.2016.02.065	80	Female	M1c	3.33333	Dead	PD	PD-1/PD-L1	Pembrolizumab/Nivolumab	HiSeq 2000(Illumina)
pt3156	10.1056/NEJMoa1406498	68	Female	M1b	13.4	Dead	PD	CTLA-4	Ipilimumab/Tremelimumab	HiSeq 2000(Illumina)
pt31A	10.1126/scitranslmed.aah3560	71	Female	NA	59.6667	Alive	PD	CTLA-4	Ipilimumab	HiSeq 2000/2500(Illumina)
pt32A	10.1126/scitranslmed.aah3560	84	Female	NA	30.9	Alive	PD	CTLA-4 plus PD-1/PD-L1	Ipilimumab+Pembrolizumab	HiSeq 2000/2500(Illumina)
Pt33	10.1016/j.cell.2016.02.065	80	Female	M1a	72.5667	Alive	CR/PR	PD-1/PD-L1	Pembrolizumab/Nivolumab	HiSeq 2000(Illumina)
pt33A	10.1126/scitranslmed.aah3560	61	Female	NA	11.9667	Dead	PD	CTLA-4 plus PD-1/PD-L1	Ipilimumab+Pembrolizumab	HiSeq 2000/2500(Illumina)
pt33C	10.1126/scitranslmed.aah3560	61	Female	NA	11.9667	Dead	PD	CTLA-4 plus PD-1/PD-L1	Ipilimumab+Pembrolizumab	HiSeq 2000/2500(Illumina)
Pt35	10.1016/j.cell.2016.02.065	65	Female	M1c	14.2333	Alive	CR/PR	PD-1/PD-L1	Pembrolizumab/Nivolumab	HiSeq 2000(Illumina)
Pt36	10.1016/j.cell.2016.02.065	61	Female	M1a	27.9	Dead	PD	PD-1/PD-L1	Pembrolizumab/Nivolumab	HiSeq 2000(Illumina)
Pt37	10.1016/j.cell.2016.02.065	70	Female	M1c	12.1333	Alive	CR/PR	PD-1/PD-L1	Pembrolizumab/Nivolumab	HiSeq 2000(Illumina)
Pt38	10.1016/j.cell.2016.02.065	57	Female	M1c	14.9333	Alive	CR/PR	PD-1/PD-L1	Pembrolizumab/Nivolumab	HiSeq 2000(Illumina)
pt3C	10.1126/scitranslmed.aah3560	60	Female	NA	14.9	Dead	PD	CTLA-4 plus PD-1/PD-L1	Ipilimumab+Pembrolizumab	HiSeq 2000/2500(Illumina)
pt3D1	10.1126/scitranslmed.aah3560	60	Female	NA	14.9	Dead	PD	CTLA-4 plus PD-1/PD-L1	Ipilimumab+Pembrolizumab	HiSeq 2000/2500(Illumina)
pt3D2	10.1126/scitranslmed.aah3560	60	Female	NA	14.9	Dead	PD	CTLA-4 plus PD-1/PD-L1	Ipilimumab+Pembrolizumab	HiSeq 2000/2500(Illumina)
pt4091	10.1056/NEJMoa1406498	65	Female	M1a	73	Alive	CR/PR	CTLA-4	Ipilimumab/Tremelimumab	HiSeq 2000(Illumina)
pt4092	10.1056/NEJMoa1406498	57	Female	M1a	74.2333	Alive	CR/PR	CTLA-4	Ipilimumab/Tremelimumab	HiSeq 2000(Illumina)
pt42E	10.1126/scitranslmed.aah3560	48	Female	NA	70.3667	Alive	PD	CTLA-4 plus PD-1/PD-L1	Ipilimumab+Pembrolizumab	HiSeq 2000/2500(Illumina)
pt4810	10.1056/NEJMoa1406498	48	Female	M1c	4.86667	Dead	PD	CTLA-4	Ipilimumab/Tremelimumab	HiSeq 2000(Illumina)
pt4941	10.1056/NEJMoa1406498	40	Female	M1c	87.6	Alive	CR/PR	CTLA-4	Ipilimumab/Tremelimumab	HiSeq 2000(Illumina)
pt4949	10.1056/NEJMoa1406498	79	Female	M1c	8.53333	Dead	PD	CTLA-4	Ipilimumab/Tremelimumab	HiSeq 2000(Illumina)
pt5118	10.1056/NEJMoa1406498	55	Female	M1c	32.8667	Dead	PD	CTLA-4	Ipilimumab/Tremelimumab	HiSeq 2000(Illumina)
pt5784	10.1056/NEJMoa1406498	58	Female	M1c	6.1	Dead	PD	CTLA-4	Ipilimumab/Tremelimumab	HiSeq 2000(Illumina)
pt5A	10.1126/scitranslmed.aah3560	47	Female	NA	35.0667	Dead	CR/PR	CTLA-4	Ipilimumab	HiSeq 2000/2500(Illumina)
pt6126	10.1056/NEJMoa1406498	66	Female	M1b	23.1333	Alive	CR/PR	CTLA-4	Ipilimumab/Tremelimumab	HiSeq 2000(Illumina)
pt6494	10.1056/NEJMoa1406498	63	Female	M1c	8.53333	Dead	PD	CTLA-4	Ipilimumab/Tremelimumab	HiSeq 2000(Illumina)
pt6689	10.1056/NEJMoa1406498	46	Female	M1c	14.6	Dead	PD	CTLA-4	Ipilimumab/Tremelimumab	HiSeq 2000(Illumina)
Pt7	10.1016/j.cell.2016.02.065	55	Female	M1c	22.0667	Dead	PD	PD-1/PD-L1	Pembrolizumab/Nivolumab	HiSeq 2000(Illumina)
pt7357	10.1056/NEJMoa1406498	50	Female	M1c	24.3333	Dead	PD	CTLA-4	Ipilimumab/Tremelimumab	HiSeq 2000(Illumina)
pt8815	10.1056/NEJMoa1406498	67	Female	M1b	14.6	Dead	PD	CTLA-4	Ipilimumab/Tremelimumab	HiSeq 2000(Illumina)
pt9298	10.1056/NEJMoa1406498	82	Female	M1c	51.1	Alive	CR/PR	CTLA-4	Ipilimumab/Tremelimumab	HiSeq 2000(Illumina)
pt9449	10.1056/NEJMoa1406498	64	Female	M1c	7.3	Dead	PD	CTLA-4	Ipilimumab/Tremelimumab	HiSeq 2000(Illumina)
pt9705	10.1056/NEJMoa1406498	63	Female	M1c	14.6	Dead	PD	CTLA-4	Ipilimumab/Tremelimumab	HiSeq 2000(Illumina)
pt9765	10.1056/NEJMoa1406498	38	Female	M1b	25.5667	Dead	PD	CTLA-4	Ipilimumab/Tremelimumab	HiSeq 2000(Illumina)
pt99	10.1126/science.aad0095	42	Female	M1c	54.4	Alive	SD	CTLA-4	Ipilimumab	HiSeq 2500(Illumina)
CR04885_T_N	10.1038/s41588-018-0200-2	NA	Female	NA	25.55	Dead	CR/PR	CTLA-4	NA	HiSeq 2500(Illumina)
CR06670_T_N	10.1038/s41588-018-0200-2	NA	Female	NA	45.0167	Alive	CR/PR	CTLA-4	NA	HiSeq 2500(Illumina)
CR1509_T_N	10.1038/s41588-018-0200-2	NA	Female	NA	54.75	Dead	CR/PR	CTLA-4	NA	HiSeq 2500(Illumina)
CR6126_T_N	10.1038/s41588-018-0200-2	NA	Female	NA	23.5667	Dead	CR/PR	CTLA-4	NA	HiSeq 2500(Illumina)
DFCI_MM_1-TP-NB-SM-BZRJ8-SM-BZRJC	10.1038/s41588-018-0200-2	NA	Female	NA	20	Dead	CR/PR	PD-1/PD-L1	NA	HiSeq 2500(Illumina)
DFCI_MM_2-TP-NB-SM-BZRJA-SM-BZRJD	10.1038/s41588-018-0200-2	NA	Female	NA	12.1667	Dead	CR/PR	PD-1/PD-L1	NA	HiSeq 2500(Illumina)
LSD2057_T_N	10.1038/s41588-018-0200-2	NA	Female	NA	40.15	Dead	SD	CTLA-4	NA	HiSeq 2500(Illumina)
MEL-582186-TP-NB-SM-CN21Q-SM-CJP7T	10.1038/s41588-018-0200-2	NA	Female	NA	13.8333	Dead	CR/PR	CTLA-4 plus PD-1/PD-L1	NA	HiSeq 2500(Illumina)
MEL-650366-TP-NB-SM-CN221-SM-CJP7U	10.1038/s41588-018-0200-2	NA	Female	NA	26.4667	Dead	PD	CTLA-4 plus PD-1/PD-L1	NA	HiSeq 2500(Illumina)
MEL-682321-TP-NB-SM-CN21G-SM-CJP7S	10.1038/s41588-018-0200-2	NA	Female	NA	14.9	Dead	CR/PR	CTLA-4 plus PD-1/PD-L1	NA	HiSeq 2500(Illumina)
MEL-IPI_Pat02-TP-NB-SM-4DJZX-SM-4NFU4	10.1038/s41588-018-0200-2	42	Female	NA	54.4	Dead	SD	CTLA-4	NA	HiSeq 2500(Illumina)
MEL-IPI_Pat03-TP-NB-SM-4DJZY-SM-4NFU5	10.1038/s41588-018-0200-2	61	Female	NA	3.33333	Alive	PD	CTLA-4	NA	HiSeq 2500(Illumina)
MEL-IPI_Pat104-TP-NT-SM-4CU6R-SM-53U4Q	10.1038/s41588-018-0200-2	45	Female	NA	7.9	Alive	SD	CTLA-4	NA	HiSeq 2500(Illumina)
MEL-IPI_Pat106-TP-NT-SM-4CU6T-SM-4MGPK	10.1038/s41588-018-0200-2	43	Female	NA	8.33333	Alive	PD	CTLA-4	NA	HiSeq 2500(Illumina)
MEL-IPI_Pat118-TP-NT-SM-5X2QV-SM-5X2RD	10.1038/s41588-018-0200-2	43	Female	NA	10.4333	Alive	PD	CTLA-4	NA	HiSeq 2500(Illumina)
MEL-IPI_Pat123-TP-NB-SM-5X2R1-SM-5VWHL	10.1038/s41588-018-0200-2	49	Female	NA	28.4333	Alive	SD	CTLA-4	NA	HiSeq 2500(Illumina)
MEL-IPI_Pat127-TP-NB-SM-5X2R5-SM-5VWHP	10.1038/s41588-018-0200-2	24	Female	NA	11.0667	Alive	PD	CTLA-4	NA	HiSeq 2500(Illumina)
MEL-IPI_Pat135-TP-NB-SM-7A152-SM-5VWHU	10.1038/s41588-018-0200-2	29	Female	NA	2.7	Alive	PD	CTLA-4	NA	HiSeq 2500(Illumina)
MEL-IPI_Pat138-TP-NB-SM-7A155-SM-5VWHX	10.1038/s41588-018-0200-2	39	Female	NA	49.2667	Alive	SD	CTLA-4	NA	HiSeq 2500(Illumina)
MEL-IPI_Pat14-TP-NB-SM-53U3C-SM-4NFUG	10.1038/s41588-018-0200-2	47	Female	NA	5.43333	Alive	PD	CTLA-4	NA	HiSeq 2500(Illumina)
MEL-IPI_Pat148-TP-NB-SM-5VWJQ-SM-5VWI8	10.1038/s41588-018-0200-2	36	Female	NA	2.8	Alive	PD	CTLA-4	NA	HiSeq 2500(Illumina)
MEL-IPI_Pat157-TP-NB-SM-7A15B-SM-5VWIH	10.1038/s41588-018-0200-2	69	Female	NA	2.86667	Alive	NA	CTLA-4	NA	HiSeq 2500(Illumina)
MEL-IPI_Pat16-TP-NT-SM-53U3E-SM-53U5B	10.1038/s41588-018-0200-2	68	Female	NA	27.0333	Alive	PD	CTLA-4	NA	HiSeq 2500(Illumina)
MEL-IPI_Pat162-TP-NB-SM-7A15D-SM-5VWIM	10.1038/s41588-018-0200-2	55	Female	NA	7.03333	Alive	PD	CTLA-4	NA	HiSeq 2500(Illumina)
MEL-IPI_Pat174-TP-NB-SM-5VOB4-SM-5VWIY	10.1038/s41588-018-0200-2	57	Female	NA	22.9333	Dead	CR/PR	CTLA-4	NA	HiSeq 2500(Illumina)
MEL-IPI_Pat175-TP-NB-SM-7A15L-SM-5VWIZ	10.1038/s41588-018-0200-2	66	Female	NA	3	Alive	NA	CTLA-4	NA	HiSeq 2500(Illumina)
MEL-IPI_Pat18-TP-NT-SM-4DK1E-SM-53U5D	10.1038/s41588-018-0200-2	55	Female	NA	37.8	Dead	PD	CTLA-4	NA	HiSeq 2500(Illumina)
MEL-IPI_Pat24-TP-NT-SM-4DK1K-SM-53U5J	10.1038/s41588-018-0200-2	74	Female	NA	32.3667	Dead	CR/PR	CTLA-4	NA	HiSeq 2500(Illumina)
MEL-IPI_Pat43-TP-NB-SM-4DK24-SM-4NFVA	10.1038/s41588-018-0200-2	75	Female	NA	1.23333	Alive	PD	CTLA-4	NA	HiSeq 2500(Illumina)
MEL-IPI_Pat46-TP-NT-SM-53U48-SM-53U5S	10.1038/s41588-018-0200-2	37	Female	NA	5.33333	Alive	PD	CTLA-4	NA	HiSeq 2500(Illumina)
MEL-IPI_Pat55-TP-NB-SM-4DK2G-SM-4NFVM	10.1038/s41588-018-0200-2	71	Female	NA	6.43333	Alive	PD	CTLA-4	NA	HiSeq 2500(Illumina)
MEL-IPI_Pat58-TP-NB-SM-4DK2J-SM-4NFVP	10.1038/s41588-018-0200-2	59	Female	NA	21.7333	Alive	PD	CTLA-4	NA	HiSeq 2500(Illumina)
MEL-IPI_Pat61-TP-NB-SM-4DK2M-SM-4NFVS	10.1038/s41588-018-0200-2	78	Female	NA	4.03333	Alive	PD	CTLA-4	NA	HiSeq 2500(Illumina)
MEL-IPI_Pat66-TP-NB-SM-4DK2R-SM-4NFVX	10.1038/s41588-018-0200-2	44	Female	NA	21.7667	Dead	SD	CTLA-4	NA	HiSeq 2500(Illumina)
MEL-IPI_Pat81-TP-NB-SM-4DK37-SM-4NFWD	10.1038/s41588-018-0200-2	54	Female	NA	20.9333	Alive	PD	CTLA-4	NA	HiSeq 2500(Illumina)
MEL-IPI_Pat82-TP-NT-SM-4DK38-SM-53U55	10.1038/s41588-018-0200-2	54	Female	NA	3.46667	Alive	PD	CTLA-4	NA	HiSeq 2500(Illumina)
MEL-IPI_Pat98-TP-NT-SM-4CU6L-SM-53U4K	10.1038/s41588-018-0200-2	57	Female	NA	4.66667	Alive	PD	CTLA-4	NA	HiSeq 2500(Illumina)
MEL-IPI_Pat99-TP-NT-SM-4CU6M-SM-53U4L	10.1038/s41588-018-0200-2	36	Female	NA	11.7333	Alive	PD	CTLA-4	NA	HiSeq 2500(Illumina)
NR4810_T_N	10.1038/s41588-018-0200-2	NA	Female	NA	4.86667	Dead	PD	CTLA-4	NA	HiSeq 2500(Illumina)
NR4949_T_N	10.1038/s41588-018-0200-2	NA	Female	NA	8.51667	Dead	PD	CTLA-4	NA	HiSeq 2500(Illumina)
NR8815_T_N	10.1038/s41588-018-0200-2	NA	Female	NA	14.6	Dead	PD	CTLA-4	NA	HiSeq 2500(Illumina)
NR9449_T_N	10.1038/s41588-018-0200-2	NA	Female	NA	7.3	Dead	PD	CTLA-4	NA	HiSeq 2500(Illumina)
NR9705_T_N	10.1038/s41588-018-0200-2	NA	Female	NA	14.6	Dead	PD	CTLA-4	NA	HiSeq 2500(Illumina)
NR9765_T_N	10.1038/s41588-018-0200-2	NA	Female	NA	25.55	Dead	PD	CTLA-4	NA	HiSeq 2500(Illumina)
PR4091_T_N	10.1038/s41588-018-0200-2	NA	Female	NA	73.2667	Dead	CR/PR	CTLA-4	NA	HiSeq 2500(Illumina)
PR4092_T_N	10.1038/s41588-018-0200-2	NA	Female	NA	74.2167	Dead	CR/PR	CTLA-4	NA	HiSeq 2500(Illumina)
SD0346_T_N	10.1038/s41588-018-0200-2	NA	Female	NA	35.2833	Alive	SD	CTLA-4	NA	HiSeq 2500(Illumina)
SD2051_T_N	10.1038/s41588-018-0200-2	NA	Female	NA	9.73333	Alive	SD	CTLA-4	NA	HiSeq 2500(Illumina)
SD2056_T_N	10.1038/s41588-018-0200-2	NA	Female	NA	48.5333	Dead	SD	CTLA-4	NA	HiSeq 2500(Illumina)
SD5118_T_N	10.1038/s41588-018-0200-2	NA	Female	NA	32.85	Alive	SD	CTLA-4	NA	HiSeq 2500(Illumina)
SD6494_T_N	10.1038/s41588-018-0200-2	NA	Female	NA	8.51667	Alive	SD	CTLA-4	NA	HiSeq 2500(Illumina)
SD7357_T_N	10.1038/s41588-018-0200-2	NA	Female	NA	24.3333	Alive	SD	CTLA-4	NA	HiSeq 2500(Illumina)
Patient102	10.1038/s41591-019-0654-5	NA	Male	M1c	26.1667	Alive	MR	PD-1/PD-L1	Pembrolizumab	HiSeq(Illumina)
Patient107	10.1038/s41591-019-0654-5	NA	Male	M1c	1.56667	Dead	CR/PR	PD-1/PD-L1	Pembrolizumab	HiSeq(Illumina)
Patient108	10.1038/s41591-019-0654-5	NA	Male	M1c	5.5	Dead	PD	PD-1/PD-L1	Pembrolizumab	HiSeq(Illumina)
Patient125	10.1038/s41591-019-0654-5	NA	Male	M1c	32.6	Alive	CR/PR	PD-1/PD-L1	Nivolumab	HiSeq(Illumina)
Patient126	10.1038/s41591-019-0654-5	NA	Male	M1c	33.0667	Alive	CR/PR	PD-1/PD-L1	Nivolumab	HiSeq(Illumina)
Patient127	10.1038/s41591-019-0654-5	NA	Male	M1c	28.8667	Alive	CR/PR	PD-1/PD-L1	Nivolumab	HiSeq(Illumina)
Patient13	10.1038/s41591-019-0654-5	NA	Male	M1c	1.93333	Dead	PD	CTLA-4 plus PD-1/PD-L1	Ipilimumab+Pembrolizumab	HiSeq(Illumina)
Patient131	10.1038/s41591-019-0654-5	NA	Male	M1b	27.7667	Alive	CR/PR	PD-1/PD-L1	Pembrolizumab	HiSeq(Illumina)
Patient132	10.1038/s41591-019-0654-5	NA	Male	M1b	24.6333	Alive	CR/PR	PD-1/PD-L1	Pembrolizumab	HiSeq(Illumina)
Patient133	10.1038/s41591-019-0654-5	NA	Male	M1c	12.3333	Dead	PD	PD-1/PD-L1	Pembrolizumab	HiSeq(Illumina)
Patient134	10.1038/s41591-019-0654-5	NA	Male	M1b	19.6667	Dead	PD	PD-1/PD-L1	Pembrolizumab	HiSeq(Illumina)
Patient135	10.1038/s41591-019-0654-5	NA	Male	M1c	20.9333	Alive	CR/PR	PD-1/PD-L1	Pembrolizumab	HiSeq(Illumina)
Patient136	10.1038/s41591-019-0654-5	NA	Male	M1b	23.2667	Alive	PD	PD-1/PD-L1	Pembrolizumab	HiSeq(Illumina)
Patient140	10.1038/s41591-019-0654-5	NA	Male	M1b	11.7	Dead	PD	PD-1/PD-L1	Pembrolizumab	HiSeq(Illumina)
Patient143	10.1038/s41591-019-0654-5	NA	Male	M0	21	Alive	PD	PD-1/PD-L1	Pembrolizumab	HiSeq(Illumina)
Patient144	10.1038/s41591-019-0654-5	NA	Male	M1c	22.0667	Alive	CR/PR	PD-1/PD-L1	Pembrolizumab	HiSeq(Illumina)
Patient145	10.1038/s41591-019-0654-5	NA	Male	M1c	27.7667	Alive	CR/PR	PD-1/PD-L1	Pembrolizumab	HiSeq(Illumina)
Patient147	10.1038/s41591-019-0654-5	NA	Male	M1c	32	Alive	CR/PR	PD-1/PD-L1	Nivolumab	HiSeq(Illumina)
Patient149	10.1038/s41591-019-0654-5	NA	Male	M1c	16.5667	Dead	SD	PD-1/PD-L1	Pembrolizumab	HiSeq(Illumina)
Patient150	10.1038/s41591-019-0654-5	NA	Male	M1c	22.8333	Alive	CR/PR	PD-1/PD-L1	Pembrolizumab	HiSeq(Illumina)
Patient155	10.1038/s41591-019-0654-5	NA	Male	M0	15.8333	Alive	PD	PD-1/PD-L1	Pembrolizumab	HiSeq(Illumina)
Patient156	10.1038/s41591-019-0654-5	NA	Male	M1c	2.9	Dead	PD	PD-1/PD-L1	Pembrolizumab	HiSeq(Illumina)
Patient157	10.1038/s41591-019-0654-5	NA	Male	M1c	4.76667	Alive	PD	PD-1/PD-L1	Pembrolizumab	HiSeq(Illumina)
Patient158	10.1038/s41591-019-0654-5	NA	Male	M1c	6.46667	Alive	CR/PR	PD-1/PD-L1	Pembrolizumab	HiSeq(Illumina)
Patient162	10.1038/s41591-019-0654-5	NA	Male	M1c	6.7	Dead	PD	CTLA-4 plus PD-1/PD-L1	Ipilimumab+Nivolumab	HiSeq(Illumina)
Patient163	10.1038/s41591-019-0654-5	NA	Male	M1c	5.76667	Dead	PD	CTLA-4 plus PD-1/PD-L1	Ipilimumab+Nivolumab	HiSeq(Illumina)
Patient165	10.1038/s41591-019-0654-5	NA	Male	M1c	2.5	Alive	PD	PD-1/PD-L1	Pembrolizumab	HiSeq(Illumina)
Patient168	10.1038/s41591-019-0654-5	NA	Male	M1c	20.7667	Alive	CR/PR	PD-1/PD-L1	Nivolumab	HiSeq(Illumina)
Patient169	10.1038/s41591-019-0654-5	NA	Male	M1c	18.1	Alive	CR/PR	PD-1/PD-L1	Pembrolizumab	HiSeq(Illumina)
Patient17	10.1038/s41591-019-0654-5	NA	Male	M1c	22.8667	Dead	SD	CTLA-4 plus PD-1/PD-L1	Ipilimumab+Nivolumab	HiSeq(Illumina)
Patient170	10.1038/s41591-019-0654-5	NA	Male	M0	11.5667	Alive	SD	PD-1/PD-L1	Pembrolizumab	HiSeq(Illumina)
Patient172	10.1038/s41591-019-0654-5	NA	Male	M0	9.06667	Alive	SD	PD-1/PD-L1	Pembrolizumab	HiSeq(Illumina)
Patient18	10.1038/s41591-019-0654-5	NA	Male	M0	4.33333	Dead	PD	PD-1/PD-L1	Nivolumab	HiSeq(Illumina)
Patient180	10.1038/s41591-019-0654-5	NA	Male	M1c	12.6667	Dead	SD	PD-1/PD-L1	Pembrolizumab	HiSeq(Illumina)
Patient183	10.1038/s41591-019-0654-5	NA	Male	M1c	19.0667	Dead	PD	PD-1/PD-L1	Pembrolizumab	HiSeq(Illumina)
Patient184	10.1038/s41591-019-0654-5	NA	Male	M1c	17.1	Alive	CR/PR	PD-1/PD-L1	Nivolumab	HiSeq(Illumina)
Patient185	10.1038/s41591-019-0654-5	NA	Male	M1c	6.76667	Alive	SD	PD-1/PD-L1	Nivolumab	HiSeq(Illumina)
Patient188	10.1038/s41591-019-0654-5	NA	Male	M1a	2.46667	Dead	PD	PD-1/PD-L1	Pembrolizumab	HiSeq(Illumina)
Patient191	10.1038/s41591-019-0654-5	NA	Male	M1b	21.9333	Alive	CR/PR	PD-1/PD-L1	Nivolumab	HiSeq(Illumina)
Patient195	10.1038/s41591-019-0654-5	NA	Male	M1c	29.8333	Alive	CR/PR	CTLA-4 plus PD-1/PD-L1	Ipilimumab+Nivolumab	HiSeq(Illumina)
Patient196	10.1038/s41591-019-0654-5	NA	Male	M1c	2.7	Dead	PD	PD-1/PD-L1	Nivolumab	HiSeq(Illumina)
Patient200	10.1038/s41591-019-0654-5	NA	Male	M1c	17.0667	Dead	PD	PD-1/PD-L1	Pembrolizumab	HiSeq(Illumina)
Patient201	10.1038/s41591-019-0654-5	NA	Male	M0	5.56667	Dead	PD	PD-1/PD-L1	Pembrolizumab	HiSeq(Illumina)
Patient203	10.1038/s41591-019-0654-5	NA	Male	M1b	20.8667	Dead	PD	CTLA-4 plus PD-1/PD-L1	Ipilimumab+Pembrolizumab	HiSeq(Illumina)
Patient204	10.1038/s41591-019-0654-5	NA	Male	M1a	27.3	Alive	CR/PR	PD-1/PD-L1	Pembrolizumab	HiSeq(Illumina)
Patient206	10.1038/s41591-019-0654-5	NA	Male	M1c	3	Dead	PD	CTLA-4 plus PD-1/PD-L1	Ipilimumab+Pembrolizumab	HiSeq(Illumina)
Patient22	10.1038/s41591-019-0654-5	NA	Male	M1c	8.43333	Dead	PD	CTLA-4 plus PD-1/PD-L1	Ipilimumab+Nivolumab	HiSeq(Illumina)
Patient23	10.1038/s41591-019-0654-5	NA	Male	M0	32.5	Alive	PD	PD-1/PD-L1	Nivolumab	HiSeq(Illumina)
Patient24	10.1038/s41591-019-0654-5	NA	Male	M1c	4.56667	Dead	PD	CTLA-4 plus PD-1/PD-L1	Ipilimumab+Nivolumab	HiSeq(Illumina)
Patient25	10.1038/s41591-019-0654-5	NA	Male	M1c	36.5333	Alive	CR/PR	CTLA-4 plus PD-1/PD-L1	Ipilimumab+Pembrolizumab	HiSeq(Illumina)
Patient27	10.1038/s41591-019-0654-5	NA	Male	M1a	14.3667	Dead	PD	CTLA-4 plus PD-1/PD-L1	Ipilimumab+Pembrolizumab	HiSeq(Illumina)
Patient31	10.1038/s41591-019-0654-5	NA	Male	M1c	14.2	Dead	PD	CTLA-4 plus PD-1/PD-L1	Ipilimumab+Pembrolizumab	HiSeq(Illumina)
Patient34	10.1038/s41591-019-0654-5	NA	Male	M1b	56.3667	Alive	CR/PR	CTLA-4 plus PD-1/PD-L1	Ipilimumab+Pembrolizumab	HiSeq(Illumina)
Patient35	10.1038/s41591-019-0654-5	NA	Male	M1c	32.2667	Dead	SD	CTLA-4 plus PD-1/PD-L1	Ipilimumab+Nivolumab	HiSeq(Illumina)
Patient36	10.1038/s41591-019-0654-5	NA	Male	M1c	15.0333	Dead	PD	PD-1/PD-L1	Nivolumab	HiSeq(Illumina)
Patient37	10.1038/s41591-019-0654-5	NA	Male	M1c	9.16667	Dead	PD	PD-1/PD-L1	Nivolumab	HiSeq(Illumina)
Patient38	10.1038/s41591-019-0654-5	NA	Male	M1c	11.4333	Dead	PD	CTLA-4 plus PD-1/PD-L1	Ipilimumab+Nivolumab	HiSeq(Illumina)
Patient39	10.1038/s41591-019-0654-5	NA	Male	M1a	31.2333	Alive	SD	PD-1/PD-L1	Nivolumab	HiSeq(Illumina)
Patient4	10.1038/s41591-019-0654-5	NA	Male	M1c	20	Dead	CR/PR	CTLA-4 plus PD-1/PD-L1	Ipilimumab+Pembrolizumab	HiSeq(Illumina)
Patient41	10.1038/s41591-019-0654-5	NA	Male	M1b	56.1667	Alive	CR/PR	CTLA-4 plus PD-1/PD-L1	Ipilimumab+Nivolumab	HiSeq(Illumina)
Patient42	10.1038/s41591-019-0654-5	NA	Male	M1c	34.2333	Alive	CR/PR	CTLA-4 plus PD-1/PD-L1	Ipilimumab+Nivolumab	HiSeq(Illumina)
Patient43	10.1038/s41591-019-0654-5	NA	Male	M1c	30.8333	Alive	CR/PR	PD-1/PD-L1	Nivolumab	HiSeq(Illumina)
Patient44	10.1038/s41591-019-0654-5	NA	Male	M1c	30.7333	Alive	CR/PR	CTLA-4 plus PD-1/PD-L1	Ipilimumab+Nivolumab	HiSeq(Illumina)
Patient45	10.1038/s41591-019-0654-5	NA	Male	M1c	55.5333	Alive	CR/PR	CTLA-4 plus PD-1/PD-L1	Ipilimumab+Nivolumab	HiSeq(Illumina)
Patient46	10.1038/s41591-019-0654-5	NA	Male	M1c	29.8667	Alive	SD	PD-1/PD-L1	Pembrolizumab	HiSeq(Illumina)
Patient51	10.1038/s41591-019-0654-5	NA	Male	M1b	51.5667	Alive	CR/PR	PD-1/PD-L1	Nivolumab	HiSeq(Illumina)
Patient54	10.1038/s41591-019-0654-5	NA	Male	M1c	33.9	Dead	MR	CTLA-4 plus PD-1/PD-L1	Ipilimumab+Pembrolizumab	HiSeq(Illumina)
Patient55	10.1038/s41591-019-0654-5	NA	Male	M1c	50.1	Alive	CR/PR	PD-1/PD-L1	Nivolumab	HiSeq(Illumina)
Patient56	10.1038/s41591-019-0654-5	NA	Male	M1c	4.06667	Dead	PD	CTLA-4 plus PD-1/PD-L1	Ipilimumab+Nivolumab	HiSeq(Illumina)
Patient58	10.1038/s41591-019-0654-5	NA	Male	M1c	10.1	Dead	PD	CTLA-4 plus PD-1/PD-L1	Ipilimumab+Nivolumab	HiSeq(Illumina)
Patient59	10.1038/s41591-019-0654-5	NA	Male	M1c	6.36667	Dead	PD	CTLA-4 plus PD-1/PD-L1	Ipilimumab+Nivolumab	HiSeq(Illumina)
Patient60	10.1038/s41591-019-0654-5	NA	Male	M1b	22.0667	Dead	SD	CTLA-4 plus PD-1/PD-L1	Ipilimumab+Nivolumab	HiSeq(Illumina)
Patient7	10.1038/s41591-019-0654-5	NA	Male	M1c	8.96667	Dead	SD	CTLA-4 plus PD-1/PD-L1	Ipilimumab+Pembrolizumab	HiSeq(Illumina)
Patient72	10.1038/s41591-019-0654-5	NA	Male	M1a	13.1667	Alive	PD	CTLA-4 plus PD-1/PD-L1	Ipilimumab+Nivolumab	HiSeq(Illumina)
Patient73	10.1038/s41591-019-0654-5	NA	Male	M1c	28.2	Dead	PD	CTLA-4 plus PD-1/PD-L1	Ipilimumab+Nivolumab	HiSeq(Illumina)
Patient75	10.1038/s41591-019-0654-5	NA	Male	M1c	29.7	Alive	CR/PR	PD-1/PD-L1	Nivolumab	HiSeq(Illumina)
Patient8	10.1038/s41591-019-0654-5	NA	Male	M1b	33.5	Dead	SD	PD-1/PD-L1	Pembrolizumab	HiSeq(Illumina)
Patient80	10.1038/s41591-019-0654-5	NA	Male	M1b	16.7333	Dead	PD	CTLA-4 plus PD-1/PD-L1	Ipilimumab+Pembrolizumab	HiSeq(Illumina)
Patient82	10.1038/s41591-019-0654-5	NA	Male	M1c	4.36667	Dead	PD	CTLA-4 plus PD-1/PD-L1	Ipilimumab+Pembrolizumab	HiSeq(Illumina)
Patient83	10.1038/s41591-019-0654-5	NA	Male	M1c	2.36667	Dead	PD	CTLA-4 plus PD-1/PD-L1	Ipilimumab+Nivolumab	HiSeq(Illumina)
Patient86	10.1038/s41591-019-0654-5	NA	Male	M1c	44.2333	Alive	SD	CTLA-4 plus PD-1/PD-L1	Ipilimumab+Pembrolizumab	HiSeq(Illumina)
Patient88	10.1038/s41591-019-0654-5	NA	Male	M1c	2.46667	Dead	PD	CTLA-4 plus PD-1/PD-L1	Ipilimumab+Pembrolizumab	HiSeq(Illumina)
Patient96	10.1038/s41591-019-0654-5	NA	Male	M1c	30.4333	Alive	CR/PR	PD-1/PD-L1	Nivolumab	HiSeq(Illumina)
Patient99	10.1038/s41591-019-0654-5	NA	Male	M1c	30.7	Alive	CR/PR	PD-1/PD-L1	Nivolumab	HiSeq(Illumina)
pt0095	10.1056/NEJMoa1406498	74	Male	M1b	69.3667	Alive	CR/PR	CTLA-4	Ipilimumab/Tremelimumab	HiSeq 2000(Illumina)
pt0167	10.1056/NEJMoa1406498	33	Male	M1c	32.8667	Alive	CR/PR	CTLA-4	Ipilimumab/Tremelimumab	HiSeq 2000(Illumina)
pt0244	10.1056/NEJMoa1406498	49	Male	M1c	25.5667	Alive	CR/PR	CTLA-4	Ipilimumab/Tremelimumab	HiSeq 2000(Illumina)
pt03803	10.1056/NEJMoa1406498	90	Male	M0	96.1333	Dead	CR/PR	CTLA-4	Ipilimumab/Tremelimumab	HiSeq 2000(Illumina)
Pt10	10.1016/j.cell.2016.02.065	60	Male	M1a	12.9	Alive	PD	PD-1/PD-L1	Pembrolizumab/Nivolumab	HiSeq 2000(Illumina)
pt101	10.1126/science.aad0095	71	Male	M1b	32.9	Alive	CR/PR	CTLA-4	Ipilimumab	HiSeq 2500(Illumina)
pt102	10.1126/science.aad0095	33	Male	M1c	5.36667	Dead	PD	CTLA-4	Ipilimumab	HiSeq 2500(Illumina)
pt103	10.1126/science.aad0095	36	Male	M0	35	Alive	SD	CTLA-4	Ipilimumab	HiSeq 2500(Illumina)
pt104	10.1126/science.aad0095	73	Male	M1c	4.66667	Dead	PD	CTLA-4	Ipilimumab	HiSeq 2500(Illumina)
pt105	10.1126/science.aad0095	70	Male	M1c	12	Dead	PD	CTLA-4	Ipilimumab	HiSeq 2500(Illumina)
pt106	10.1126/science.aad0095	75	Male	M1c	9.6	Dead	PD	CTLA-4	Ipilimumab	HiSeq 2500(Illumina)
pt107	10.1126/science.aad0095	70	Male	M1c	34.9333	Dead	CR/PR	CTLA-4	Ipilimumab	HiSeq 2500(Illumina)
pt109	10.1126/science.aad0095	41	Male	M0	34.9	Alive	CR/PR	CTLA-4	Ipilimumab	HiSeq 2500(Illumina)
Pt11	10.1016/j.cell.2016.02.065	37	Male	M1c	15.5667	Dead	PD	PD-1/PD-L1	Pembrolizumab/Nivolumab	HiSeq 2000(Illumina)
pt111	10.1126/science.aad0095	69	Male	M1b	2.76667	Dead	PD	CTLA-4	Ipilimumab	HiSeq 2500(Illumina)
pt112	10.1126/science.aad0095	67	Male	M1c	26.3333	Alive	PD	CTLA-4	Ipilimumab	HiSeq 2500(Illumina)
pt1120	10.1056/NEJMoa1406498	68	Male	M1a	55.9667	Alive	CR/PR	CTLA-4	Ipilimumab/Tremelimumab	HiSeq 2000(Illumina)
pt11217	10.1056/NEJMoa1406498	66	Male	M1c	19.4667	Dead	CR/PR	CTLA-4	Ipilimumab/Tremelimumab	HiSeq 2000(Illumina)
pt113	10.1126/science.aad0095	76	Male	M1b	10.6667	Dead	PD	CTLA-4	Ipilimumab	HiSeq 2500(Illumina)
pt114	10.1126/science.aad0095	68	Male	M1c	10.0333	Dead	CR/PR	CTLA-4	Ipilimumab	HiSeq 2500(Illumina)
pt115	10.1126/science.aad0095	45	Male	M1c	4.83333	Dead	PD	CTLA-4	Ipilimumab	HiSeq 2500(Illumina)
pt116	10.1126/science.aad0095	73	Male	M1c	30.4667	Alive	CR/PR	CTLA-4	Ipilimumab	HiSeq 2500(Illumina)
pt118	10.1126/science.aad0095	61	Male	M0	26.9333	Alive	PD	CTLA-4	Ipilimumab	HiSeq 2500(Illumina)
pt119	10.1126/science.aad0095	46	Male	M1c	4.06667	Dead	PD	CTLA-4	Ipilimumab	HiSeq 2500(Illumina)
Pt12	10.1016/j.cell.2016.02.065	59	Male	M1c	10.9	Dead	PD	PD-1/PD-L1	Pembrolizumab/Nivolumab	HiSeq 2000(Illumina)
pt121	10.1126/science.aad0095	78	Male	M1b	4.86667	Dead	PD	CTLA-4	Ipilimumab	HiSeq 2500(Illumina)
pt122	10.1126/science.aad0095	77	Male	M1b	21.3667	Alive	CR/PR	CTLA-4	Ipilimumab	HiSeq 2500(Illumina)
pt124	10.1126/science.aad0095	29	Male	M1c	3.76667	Dead	PD	CTLA-4	Ipilimumab	HiSeq 2500(Illumina)
pt125	10.1126/science.aad0095	18	Male	M1b	17.9667	Alive	PD	CTLA-4	Ipilimumab	HiSeq 2500(Illumina)
pt126	10.1126/science.aad0095	78	Male	M0	24.4	Dead	PD	CTLA-4	Ipilimumab	HiSeq 2500(Illumina)
pt127	10.1126/science.aad0095	76	Male	M1c	1.5	Dead	PD	CTLA-4	Ipilimumab	HiSeq 2500(Illumina)
pt128	10.1126/science.aad0095	32	Male	M1c	8.56667	Dead	SD	CTLA-4	Ipilimumab	HiSeq 2500(Illumina)
pt129	10.1126/science.aad0095	81	Male	M1c	22.5333	Alive	CR/PR	CTLA-4	Ipilimumab	HiSeq 2500(Illumina)
pt12A	10.1126/scitranslmed.aah3560	70	Male	NA	27.8333	Alive	PD	CTLA-4	Ipilimumab	HiSeq 2000/2500(Illumina)
pt130	10.1126/science.aad0095	76	Male	M1b	18.0667	Dead	PD	CTLA-4	Ipilimumab	HiSeq 2500(Illumina)
pt133	10.1126/science.aad0095	58	Male	M1c	3.3	Dead	PD	CTLA-4	Ipilimumab	HiSeq 2500(Illumina)
pt135	10.1126/science.aad0095	62	Male	M1c	16.4	Dead	PD	CTLA-4	Ipilimumab	HiSeq 2500(Illumina)
pt136	10.1126/science.aad0095	71	Male	M1c	5.1	Dead	PD	CTLA-4	Ipilimumab	HiSeq 2500(Illumina)
pt137	10.1126/science.aad0095	63	Male	M1a	7.46667	Dead	PD	CTLA-4	Ipilimumab	HiSeq 2500(Illumina)
pt139	10.1126/science.aad0095	32	Male	M1c	1.66667	Dead	PD	CTLA-4	Ipilimumab	HiSeq 2500(Illumina)
pt140	10.1126/science.aad0095	68	Male	M1c	6.8	Dead	PD	CTLA-4	Ipilimumab	HiSeq 2500(Illumina)
pt142	10.1126/science.aad0095	51	Male	M1b	28.0667	Alive	PD	CTLA-4	Ipilimumab	HiSeq 2500(Illumina)
pt144	10.1126/science.aad0095	79	Male	M1c	5.06667	Dead	PD	CTLA-4	Ipilimumab	HiSeq 2500(Illumina)
pt146	10.1126/science.aad0095	54	Male	M1c	24.9667	Alive	PD	CTLA-4	Ipilimumab	HiSeq 2500(Illumina)
pt148	10.1126/science.aad0095	31	Male	M1c	2.56667	Dead	SD	CTLA-4	Ipilimumab	HiSeq 2500(Illumina)
pt149	10.1126/science.aad0095	50	Male	M1c	13.6	Dead	PD	CTLA-4	Ipilimumab	HiSeq 2500(Illumina)
pt1494	10.1056/NEJMoa1406498	70	Male	M1c	24.3333	Alive	CR/PR	CTLA-4	Ipilimumab/Tremelimumab	HiSeq 2000(Illumina)
Pt15	10.1016/j.cell.2016.02.065	70	Male	M1b	32.6667	Dead	CR/PR	PD-1/PD-L1	Pembrolizumab/Nivolumab	HiSeq 2000(Illumina)
pt150	10.1126/science.aad0095	68	Male	M1c	2.23333	Dead	SD	CTLA-4	Ipilimumab	HiSeq 2500(Illumina)
pt151	10.1126/science.aad0095	44	Male	M1c	6.83333	Dead	PD	CTLA-4	Ipilimumab	HiSeq 2500(Illumina)
pt152	10.1126/science.aad0095	48	Male	M1c	3.6	Dead	PD	CTLA-4	Ipilimumab	HiSeq 2500(Illumina)
pt153	10.1126/science.aad0095	66	Male	M1a	15.5333	Dead	PD	CTLA-4	Ipilimumab	HiSeq 2500(Illumina)
pt157	10.1126/science.aad0095	59	Male	M1c	5.83333	Dead	PD	CTLA-4	Ipilimumab	HiSeq 2500(Illumina)
pt158	10.1126/science.aad0095	81	Male	M1c	22.5333	Dead	SD	CTLA-4	Ipilimumab	HiSeq 2500(Illumina)
Pt16	10.1016/j.cell.2016.02.065	19	Male	M1b	6.2	Dead	PD	PD-1/PD-L1	Pembrolizumab/Nivolumab	HiSeq 2000(Illumina)
pt160	10.1126/science.aad0095	69	Male	M1c	10.8333	Dead	PD	CTLA-4	Ipilimumab	HiSeq 2500(Illumina)
pt161	10.1126/science.aad0095	61	Male	M1c	45.9667	Alive	PD	CTLA-4	Ipilimumab	HiSeq 2500(Illumina)
pt162	10.1126/science.aad0095	77	Male	M1c	39.4667	Dead	PD	CTLA-4	Ipilimumab	HiSeq 2500(Illumina)
pt163	10.1126/science.aad0095	82	Male	M1c	44.2	Alive	SD	CTLA-4	Ipilimumab	HiSeq 2500(Illumina)
pt164	10.1126/science.aad0095	72	Male	M1c	4.9	Dead	PD	CTLA-4	Ipilimumab	HiSeq 2500(Illumina)
pt165	10.1126/science.aad0095	65	Male	M1c	7.03333	Dead	PD	CTLA-4	Ipilimumab	HiSeq 2500(Illumina)
pt168	10.1126/science.aad0095	45	Male	M1c	51.3	Alive	CR/PR	CTLA-4	Ipilimumab	HiSeq 2500(Illumina)
pt169	10.1126/science.aad0095	67	Male	M1b	49.5667	Alive	CR/PR	CTLA-4	Ipilimumab	HiSeq 2500(Illumina)
pt16C	10.1126/scitranslmed.aah3560	34	Male	NA	20.4333	Dead	PD	CTLA-4 plus PD-1/PD-L1	Ipilimumab+Pembrolizumab	HiSeq 2000/2500(Illumina)
pt16D	10.1126/scitranslmed.aah3560	34	Male	NA	20.4333	Dead	PD	CTLA-4 plus PD-1/PD-L1	Ipilimumab+Pembrolizumab	HiSeq 2000/2500(Illumina)
Pt17	10.1016/j.cell.2016.02.065	67	Male	M1a	31.7667	Dead	PD	PD-1/PD-L1	Pembrolizumab/Nivolumab	HiSeq 2000(Illumina)
pt170	10.1126/science.aad0095	74	Male	M1c	1.13333	Dead	PD	CTLA-4	Ipilimumab	HiSeq 2500(Illumina)
pt171	10.1126/science.aad0095	64	Male	M1c	4.26667	Dead	PD	CTLA-4	Ipilimumab	HiSeq 2500(Illumina)
pt174	10.1126/science.aad0095	68	Male	M1c	2.96667	Dead	PD	CTLA-4	Ipilimumab	HiSeq 2500(Illumina)
pt176	10.1126/science.aad0095	78	Male	M1c	36.8667	Alive	CR/PR	CTLA-4	Ipilimumab	HiSeq 2500(Illumina)
pt177	10.1126/science.aad0095	36	Male	M1c	34.4667	Alive	SD	CTLA-4	Ipilimumab	HiSeq 2500(Illumina)
pt178	10.1126/science.aad0095	77	Male	M1c	2.16667	Dead	PD	CTLA-4	Ipilimumab	HiSeq 2500(Illumina)
pt179	10.1126/science.aad0095	73	Male	M1c	6.93333	Dead	PD	CTLA-4	Ipilimumab	HiSeq 2500(Illumina)
Pt18	10.1016/j.cell.2016.02.065	64	Male	M1c	36.0333	Alive	CR/PR	PD-1/PD-L1	Pembrolizumab/Nivolumab	HiSeq 2000(Illumina)
pt181	10.1126/science.aad0095	68	Male	M1c	7.83333	Dead	PD	CTLA-4	Ipilimumab	HiSeq 2500(Illumina)
pt182	10.1126/science.aad0095	69	Male	M0	8.33333	Dead	PD	CTLA-4	Ipilimumab	HiSeq 2500(Illumina)
pt184	10.1126/science.aad0095	36	Male	M1b	7.46667	Dead	PD	CTLA-4	Ipilimumab	HiSeq 2500(Illumina)
pt185	10.1126/science.aad0095	86	Male	M1c	9.06667	Dead	PD	CTLA-4	Ipilimumab	HiSeq 2500(Illumina)
pt186	10.1126/science.aad0095	76	Male	M1c	20.0667	Dead	PD	CTLA-4	Ipilimumab	HiSeq 2500(Illumina)
pt1867	10.1056/NEJMoa1406498	68	Male	M1c	18.2667	Dead	PD	CTLA-4	Ipilimumab/Tremelimumab	HiSeq 2000(Illumina)
pt187	10.1126/science.aad0095	65	Male	M0	34.6333	Alive	CR/PR	CTLA-4	Ipilimumab	HiSeq 2500(Illumina)
pt188	10.1126/science.aad0095	83	Male	M1c	3.53333	Dead	PD	CTLA-4	Ipilimumab	HiSeq 2500(Illumina)
Pt19	10.1016/j.cell.2016.02.065	45	Male	M1c	35.3333	Alive	CR/PR	PD-1/PD-L1	Pembrolizumab/Nivolumab	HiSeq 2000(Illumina)
pt190	10.1126/science.aad0095	39	Male	M1c	2.63333	Dead	PD	CTLA-4	Ipilimumab	HiSeq 2500(Illumina)
pt191	10.1126/science.aad0095	38	Male	M1c	17.7333	Dead	PD	CTLA-4	Ipilimumab	HiSeq 2500(Illumina)
pt192	10.1126/science.aad0095	63	Male	M1c	4.56667	Dead	PD	CTLA-4	Ipilimumab	HiSeq 2500(Illumina)
pt193	10.1126/science.aad0095	71	Male	M1c	14.7333	Dead	CR/PR	CTLA-4	Ipilimumab	HiSeq 2500(Illumina)
pt194	10.1126/science.aad0095	73	Male	M1c	6.43333	Dead	PD	CTLA-4	Ipilimumab	HiSeq 2500(Illumina)
pt195	10.1126/science.aad0095	74	Male	M1c	4.63333	Dead	PD	CTLA-4	Ipilimumab	HiSeq 2500(Illumina)
pt196	10.1126/science.aad0095	21	Male	M0	34.3	Alive	CR/PR	CTLA-4	Ipilimumab	HiSeq 2500(Illumina)
pt198	10.1126/science.aad0095	69	Male	M1b	26.7	Dead	CR/PR	CTLA-4	Ipilimumab	HiSeq 2500(Illumina)
pt199	10.1126/science.aad0095	48	Male	M1c	24.1333	Dead	SD	CTLA-4	Ipilimumab	HiSeq 2500(Illumina)
pt19D	10.1126/scitranslmed.aah3560	55	Male	NA	21.2	Dead	PD	CTLA-4 plus PD-1/PD-L1	Ipilimumab+Pembrolizumab	HiSeq 2000/2500(Illumina)
Pt2	10.1016/j.cell.2016.02.065	55	Male	M1c	30.9	Alive	CR/PR	PD-1/PD-L1	Pembrolizumab/Nivolumab	HiSeq 2000(Illumina)
pt202	10.1126/science.aad0095	22	Male	M1c	34.2333	Alive	PD	CTLA-4	Ipilimumab	HiSeq 2500(Illumina)
pt203	10.1126/science.aad0095	83	Male	M1c	15.2667	Dead	PD	CTLA-4	Ipilimumab	HiSeq 2500(Illumina)
pt204	10.1126/science.aad0095	55	Male	M1a	9.76667	Dead	SD	CTLA-4	Ipilimumab	HiSeq 2500(Illumina)
pt206	10.1126/science.aad0095	59	Male	M1c	33.5	Alive	CR/PR	CTLA-4	Ipilimumab	HiSeq 2500(Illumina)
pt207	10.1126/science.aad0095	49	Male	M1c	4.1	Dead	PD	CTLA-4	Ipilimumab	HiSeq 2500(Illumina)
pt20A	10.1126/scitranslmed.aah3560	59	Male	NA	26.1333	Alive	PD	CTLA-4 plus PD-1/PD-L1	Ipilimumab+Pembrolizumab	HiSeq 2000/2500(Illumina)
pt20E	10.1126/scitranslmed.aah3560	59	Male	NA	26.1333	Alive	PD	CTLA-4 plus PD-1/PD-L1	Ipilimumab+Pembrolizumab	HiSeq 2000/2500(Illumina)
Pt21	10.1016/j.cell.2016.02.065	60	Male	M1b	31.5	Dead	CR/PR	PD-1/PD-L1	Pembrolizumab/Nivolumab	HiSeq 2000(Illumina)
pt2137	10.1056/NEJMoa1406498	18	Male	M1c	9.73333	Dead	PD	CTLA-4	Ipilimumab/Tremelimumab	HiSeq 2000(Illumina)
pt21C	10.1126/scitranslmed.aah3560	63	Male	NA	8.23333	Dead	PD	CTLA-4 plus PD-1/PD-L1	Ipilimumab+Pembrolizumab	HiSeq 2000/2500(Illumina)
Pt22	10.1016/j.cell.2016.02.065	55	Male	M1c	6.06667	Dead	PD	PD-1/PD-L1	Pembrolizumab/Nivolumab	HiSeq 2000(Illumina)
pt22640	10.1056/NEJMoa1406498	71	Male	M1c	52.3333	Alive	CR/PR	CTLA-4	Ipilimumab/Tremelimumab	HiSeq 2000(Illumina)
Pt23	10.1016/j.cell.2016.02.065	63	Male	M1c	3.43333	Dead	PD	PD-1/PD-L1	Pembrolizumab/Nivolumab	HiSeq 2000(Illumina)
pt23A	10.1126/scitranslmed.aah3560	40	Male	NA	22.3333	Alive	PD	CTLA-4 plus PD-1/PD-L1	Ipilimumab+Pembrolizumab	HiSeq 2000/2500(Illumina)
Pt24	10.1016/j.cell.2016.02.065	70	Male	M1c	32.4667	Dead	CR/PR	PD-1/PD-L1	Pembrolizumab/Nivolumab	HiSeq 2000(Illumina)
pt2472	10.1056/NEJMoa1406498	71	Male	M1c	20.7	Alive	CR/PR	CTLA-4	Ipilimumab/Tremelimumab	HiSeq 2000(Illumina)
pt24C	10.1126/scitranslmed.aah3560	50	Male	NA	41.8	Alive	PD	CTLA-4 plus PD-1/PD-L1	Ipilimumab+Pembrolizumab	HiSeq 2000/2500(Illumina)
Pt25	10.1016/j.cell.2016.02.065	74	Male	M1c	8.73333	Dead	PD	PD-1/PD-L1	Pembrolizumab/Nivolumab	HiSeq 2000(Illumina)
Pt26	10.1016/j.cell.2016.02.065	71	Male	M1c	44.5333	Alive	CR/PR	PD-1/PD-L1	Pembrolizumab/Nivolumab	HiSeq 2000(Illumina)
Pt27	10.1016/j.cell.2016.02.065	83	Male	M1c	18.2667	Alive	CR/PR	PD-1/PD-L1	Pembrolizumab/Nivolumab	HiSeq 2000(Illumina)
Pt28	10.1016/j.cell.2016.02.065	82	Male	M1c	14.6333	Dead	CR/PR	PD-1/PD-L1	Pembrolizumab/Nivolumab	HiSeq 2000(Illumina)
pt28A	10.1126/scitranslmed.aah3560	55	Male	NA	10.4667	Dead	PD	CTLA-4 plus PD-1/PD-L1	Ipilimumab+Pembrolizumab	HiSeq 2000/2500(Illumina)
pt28D	10.1126/scitranslmed.aah3560	55	Male	NA	10.4667	Dead	PD	CTLA-4 plus PD-1/PD-L1	Ipilimumab+Pembrolizumab	HiSeq 2000/2500(Illumina)
Pt29	10.1016/j.cell.2016.02.065	84	Male	M1c	8.96667	Dead	PD	PD-1/PD-L1	Pembrolizumab/Nivolumab	HiSeq 2000(Illumina)
pt29C	10.1126/scitranslmed.aah3560	34	Male	NA	18.2667	Dead	PD	CTLA-4 plus PD-1/PD-L1	Ipilimumab+Pembrolizumab	HiSeq 2000/2500(Illumina)
pt2E	10.1126/scitranslmed.aah3560	50	Male	NA	23.9667	Alive	PD	CTLA-4 plus PD-1/PD-L1	Ipilimumab+Pembrolizumab	HiSeq 2000/2500(Illumina)
Pt3	10.1016/j.cell.2016.02.065	58	Male	M1c	23.0333	Dead	CR/PR	PD-1/PD-L1	Pembrolizumab/Nivolumab	HiSeq 2000(Illumina)
pt3086	10.1056/NEJMoa1406498	43	Male	M1c	31.6333	Dead	CR/PR	CTLA-4	Ipilimumab/Tremelimumab	HiSeq 2000(Illumina)
Pt31	10.1016/j.cell.2016.02.065	47	Male	M1c	23.4667	Alive	PD	PD-1/PD-L1	Pembrolizumab/Nivolumab	HiSeq 2000(Illumina)
Pt32	10.1016/j.cell.2016.02.065	47	Male	M1c	5.7	Dead	PD	PD-1/PD-L1	Pembrolizumab/Nivolumab	HiSeq 2000(Illumina)
Pt34	10.1016/j.cell.2016.02.065	42	Male	M1c	13.9333	Alive	CR/PR	PD-1/PD-L1	Pembrolizumab/Nivolumab	HiSeq 2000(Illumina)
pt3484	10.1056/NEJMoa1406498	74	Male	M1c	35.3	Alive	CR/PR	CTLA-4	Ipilimumab/Tremelimumab	HiSeq 2000(Illumina)
pt34A	10.1126/scitranslmed.aah3560	69	Male	NA	20.2667	Alive	CR/PR	CTLA-4 plus PD-1/PD-L1	Ipilimumab+Pembrolizumab	HiSeq 2000/2500(Illumina)
pt3549	10.1056/NEJMoa1406498	50	Male	M1c	6.1	Dead	PD	CTLA-4	Ipilimumab/Tremelimumab	HiSeq 2000(Illumina)
pt3665	10.1056/NEJMoa1406498	70	Male	M1b	32.8667	Alive	CR/PR	CTLA-4	Ipilimumab/Tremelimumab	HiSeq 2000(Illumina)
pt37B	10.1126/scitranslmed.aah3560	82	Male	NA	18.3667	Dead	CR/PR	CTLA-4	Ipilimumab	HiSeq 2000/2500(Illumina)
pt39	10.1056/NEJMoa1604958	58	Male	M1c	23.0333	NA	CR/PR	PD-1/PD-L1	Pembrolizumab	HiSeq 2000(Illumina)
Pt4	10.1016/j.cell.2016.02.065	62	Male	M1c	31.6	Alive	CR/PR	PD-1/PD-L1	Pembrolizumab/Nivolumab	HiSeq 2000(Illumina)
pt40	10.1056/NEJMoa1604958	60	Male	M1b	31.5	NA	CR/PR	PD-1/PD-L1	Pembrolizumab	HiSeq 2000(Illumina)
pt4018	10.1056/NEJMoa1406498	55	Male	M1c	3.66667	Dead	PD	CTLA-4	Ipilimumab/Tremelimumab	HiSeq 2000(Illumina)
pt4035	10.1056/NEJMoa1406498	78	Male	M1c	51.1	Alive	CR/PR	CTLA-4	Ipilimumab/Tremelimumab	HiSeq 2000(Illumina)
pt4045	10.1056/NEJMoa1406498	42	Male	M1c	20.7	Dead	PD	CTLA-4	Ipilimumab/Tremelimumab	HiSeq 2000(Illumina)
pt4046	10.1056/NEJMoa1406498	44	Male	M1a	25.5667	Alive	CR/PR	CTLA-4	Ipilimumab/Tremelimumab	HiSeq 2000(Illumina)
pt4077	10.1056/NEJMoa1406498	75	Male	M1c	74.2333	Alive	CR/PR	CTLA-4	Ipilimumab/Tremelimumab	HiSeq 2000(Illumina)
pt4083	10.1056/NEJMoa1406498	54	Male	M1c	2.43333	Dead	PD	CTLA-4	Ipilimumab/Tremelimumab	HiSeq 2000(Illumina)
pt41	10.1056/NEJMoa1604958	70	Male	M1c	32.4667	NA	CR/PR	PD-1/PD-L1	Pembrolizumab	HiSeq 2000(Illumina)
pt41A	10.1126/scitranslmed.aah3560	68	Male	NA	28.7	Alive	PD	CTLA-4 plus PD-1/PD-L1	Ipilimumab+Pembrolizumab	HiSeq 2000/2500(Illumina)
pt42	10.1056/NEJMoa1604958	61	Male	M1c	42.0667	NA	CR/PR	PD-1/PD-L1	Pembrolizumab	HiSeq 2000(Illumina)
pt45C	10.1126/scitranslmed.aah3560	59	Male	NA	44	Alive	PD	CTLA-4 plus PD-1/PD-L1	Ipilimumab+Pembrolizumab	HiSeq 2000/2500(Illumina)
pt45E	10.1126/scitranslmed.aah3560	59	Male	NA	44	Alive	PD	CTLA-4 plus PD-1/PD-L1	Ipilimumab+Pembrolizumab	HiSeq 2000/2500(Illumina)
pt4631	10.1056/NEJMoa1406498	59	Male	M1c	6.1	Dead	PD	CTLA-4	Ipilimumab/Tremelimumab	HiSeq 2000(Illumina)
pt4691	10.1056/NEJMoa1406498	62	Male	M1c	88.8333	Alive	CR/PR	CTLA-4	Ipilimumab/Tremelimumab	HiSeq 2000(Illumina)
pt4744	10.1056/NEJMoa1406498	52	Male	M1c	25.5667	Alive	CR/PR	CTLA-4	Ipilimumab/Tremelimumab	HiSeq 2000(Illumina)
pt47A	10.1126/scitranslmed.aah3560	72	Male	NA	36.4	Alive	CR/PR	CTLA-4 plus PD-1/PD-L1	Ipilimumab+Pembrolizumab	HiSeq 2000/2500(Illumina)
pt47D	10.1126/scitranslmed.aah3560	72	Male	NA	36.4	Alive	CR/PR	CTLA-4 plus PD-1/PD-L1	Ipilimumab+Pembrolizumab	HiSeq 2000/2500(Illumina)
pt4880	10.1056/NEJMoa1406498	63	Male	M1b	65.7	Alive	CR/PR	CTLA-4	Ipilimumab/Tremelimumab	HiSeq 2000(Illumina)
pt49E	10.1126/scitranslmed.aah3560	46	Male	NA	36.4667	Dead	PD	CTLA-4 plus PD-1/PD-L1	Ipilimumab+Pembrolizumab	HiSeq 2000/2500(Illumina)
pt4D	10.1126/scitranslmed.aah3560	72	Male	NA	36.1	Dead	PD	CTLA-4 plus PD-1/PD-L1	Ipilimumab+Pembrolizumab	HiSeq 2000/2500(Illumina)
Pt5	10.1016/j.cell.2016.02.065	61	Male	M1c	14.6333	Alive	CR/PR	PD-1/PD-L1	Pembrolizumab/Nivolumab	HiSeq 2000(Illumina)
pt5038	10.1056/NEJMoa1406498	55	Male	M1c	14.6	Dead	PD	CTLA-4	Ipilimumab/Tremelimumab	HiSeq 2000(Illumina)
pt50A	10.1126/scitranslmed.aah3560	68	Male	NA	53.8667	Alive	PD	CTLA-4 plus PD-1/PD-L1	Ipilimumab+Pembrolizumab	HiSeq 2000/2500(Illumina)
pt50C	10.1126/scitranslmed.aah3560	68	Male	NA	53.8667	Alive	PD	CTLA-4 plus PD-1/PD-L1	Ipilimumab+Pembrolizumab	HiSeq 2000/2500(Illumina)
pt53A	10.1126/scitranslmed.aah3560	54	Male	NA	9.23333	Dead	PD	CTLA-4 plus PD-1/PD-L1	Ipilimumab+Pembrolizumab	HiSeq 2000/2500(Illumina)
pt53D	10.1126/scitranslmed.aah3560	54	Male	NA	9.23333	Dead	PD	CTLA-4 plus PD-1/PD-L1	Ipilimumab+Pembrolizumab	HiSeq 2000/2500(Illumina)
pt54A	10.1126/scitranslmed.aah3560	28	Male	NA	23.8	Alive	PD	CTLA-4 plus PD-1/PD-L1	Ipilimumab+Pembrolizumab	HiSeq 2000/2500(Illumina)
pt54C	10.1126/scitranslmed.aah3560	28	Male	NA	23.8	Alive	PD	CTLA-4 plus PD-1/PD-L1	Ipilimumab+Pembrolizumab	HiSeq 2000/2500(Illumina)
pt5934	10.1056/NEJMoa1406498	52	Male	M1c	19.4667	Dead	PD	CTLA-4	Ipilimumab/Tremelimumab	HiSeq 2000(Illumina)
Pt6	10.1016/j.cell.2016.02.065	51	Male	M1c	29.4	Alive	CR/PR	PD-1/PD-L1	Pembrolizumab/Nivolumab	HiSeq 2000(Illumina)
pt6161	10.1056/NEJMoa1406498	81	Male	M1b	31.6333	Dead	CR/PR	CTLA-4	Ipilimumab/Tremelimumab	HiSeq 2000(Illumina)
pt6336	10.1056/NEJMoa1406498	53	Male	M1c	83.9667	Alive	CR/PR	CTLA-4	Ipilimumab/Tremelimumab	HiSeq 2000(Illumina)
pt6721	10.1056/NEJMoa1406498	64	Male	M1a	9.73333	Dead	PD	CTLA-4	Ipilimumab/Tremelimumab	HiSeq 2000(Illumina)
pt6819	10.1056/NEJMoa1406498	55	Male	M1c	41.3667	Alive	CR/PR	CTLA-4	Ipilimumab/Tremelimumab	HiSeq 2000(Illumina)
pt6842	10.1056/NEJMoa1406498	64	Male	M1c	9.73333	Dead	PD	CTLA-4	Ipilimumab/Tremelimumab	HiSeq 2000(Illumina)
pt6B	10.1126/scitranslmed.aah3560	48	Male	NA	28.0667	Dead	PD	CTLA-4 plus PD-1/PD-L1	Ipilimumab+Pembrolizumab	HiSeq 2000/2500(Illumina)
pt7623	10.1056/NEJMoa1406498	62	Male	M1c	48.6667	Alive	CR/PR	CTLA-4	Ipilimumab/Tremelimumab	HiSeq 2000(Illumina)
pt7A	10.1126/scitranslmed.aah3560	64	Male	NA	39.1333	Alive	CR/PR	CTLA-4 plus PD-1/PD-L1	Ipilimumab+Pembrolizumab	HiSeq 2000/2500(Illumina)
pt7D	10.1126/scitranslmed.aah3560	64	Male	NA	39.1333	Alive	CR/PR	CTLA-4 plus PD-1/PD-L1	Ipilimumab+Pembrolizumab	HiSeq 2000/2500(Illumina)
Pt8	10.1016/j.cell.2016.02.065	69	Male	M1a	NA	Alive	CR/PR	PD-1/PD-L1	Pembrolizumab/Nivolumab	HiSeq 2000(Illumina)
Pt9	10.1016/j.cell.2016.02.065	68	Male	M0	35.1333	Alive	CR/PR	PD-1/PD-L1	Pembrolizumab/Nivolumab	HiSeq 2000(Illumina)
pt9306	10.1056/NEJMoa1406498	65	Male	M1c	64.5	Alive	CR/PR	CTLA-4	Ipilimumab/Tremelimumab	HiSeq 2000(Illumina)
pt9341	10.1056/NEJMoa1406498	77	Male	M1a	12.1667	Dead	PD	CTLA-4	Ipilimumab/Tremelimumab	HiSeq 2000(Illumina)
pt9445	10.1056/NEJMoa1406498	50	Male	M1c	2.43333	Dead	PD	CTLA-4	Ipilimumab/Tremelimumab	HiSeq 2000(Illumina)
pt9521	10.1056/NEJMoa1406498	74	Male	M1b	32.8667	Dead	PD	CTLA-4	Ipilimumab/Tremelimumab	HiSeq 2000(Illumina)
pt9699	10.1056/NEJMoa1406498	70	Male	M1c	53.5333	Alive	CR/PR	CTLA-4	Ipilimumab/Tremelimumab	HiSeq 2000(Illumina)
pt9A	10.1126/scitranslmed.aah3560	58	Male	NA	40.4333	Alive	PD	CTLA-4 plus PD-1/PD-L1	Ipilimumab+Pembrolizumab	HiSeq 2000/2500(Illumina)
pt9C	10.1126/scitranslmed.aah3560	58	Male	NA	40.4333	Alive	PD	CTLA-4 plus PD-1/PD-L1	Ipilimumab+Pembrolizumab	HiSeq 2000/2500(Illumina)
pt9D	10.1126/scitranslmed.aah3560	58	Male	NA	40.4333	Alive	PD	CTLA-4 plus PD-1/PD-L1	Ipilimumab+Pembrolizumab	HiSeq 2000/2500(Illumina)
CR0095_T_N	10.1038/s41588-018-0200-2	NA	Male	NA	69.35	Dead	CR/PR	CTLA-4	NA	HiSeq 2500(Illumina)
CR22640_T_N	10.1038/s41588-018-0200-2	NA	Male	NA	52.3167	Dead	CR/PR	CTLA-4	NA	HiSeq 2500(Illumina)
CR3665_T_N	10.1038/s41588-018-0200-2	NA	Male	NA	32.85	Dead	CR/PR	CTLA-4	NA	HiSeq 2500(Illumina)
CR6161_T_N	10.1038/s41588-018-0200-2	NA	Male	NA	31.7333	Alive	CR/PR	CTLA-4	NA	HiSeq 2500(Illumina)
CR9306_T_N	10.1038/s41588-018-0200-2	NA	Male	NA	64.4833	Dead	CR/PR	CTLA-4	NA	HiSeq 2500(Illumina)
CR9699_T_N	10.1038/s41588-018-0200-2	NA	Male	NA	53.5333	Dead	CR/PR	CTLA-4	NA	HiSeq 2500(Illumina)
LSD0167_T_N	10.1038/s41588-018-0200-2	NA	Male	NA	32.85	Dead	SD	CTLA-4	NA	HiSeq 2500(Illumina)
LSD3484_T_N	10.1038/s41588-018-0200-2	NA	Male	NA	35.9333	Dead	SD	CTLA-4	NA	HiSeq 2500(Illumina)
LSD4744_T_N	10.1038/s41588-018-0200-2	NA	Male	NA	25.55	Dead	SD	CTLA-4	NA	HiSeq 2500(Illumina)
LSD6819_T_N	10.1038/s41588-018-0200-2	NA	Male	NA	41.3667	Dead	SD	CTLA-4	NA	HiSeq 2500(Illumina)
MEL-587761-TP-NB-SM-CN1ZV-SM-CJP7Q	10.1038/s41588-018-0200-2	NA	Male	NA	19.4667	Dead	SD	CTLA-4 plus PD-1/PD-L1	NA	HiSeq 2500(Illumina)
MEL-IPI_Pat04-TP-NB-SM-4DJZZ-SM-4NFU6	10.1038/s41588-018-0200-2	71	Male	NA	32.9	Dead	CR/PR	CTLA-4	NA	HiSeq 2500(Illumina)
MEL-IPI_Pat06-TP-NB-SM-4DK12-SM-4NFU8	10.1038/s41588-018-0200-2	33	Male	NA	5.36667	Alive	PD	CTLA-4	NA	HiSeq 2500(Illumina)
MEL-IPI_Pat07-TP-NB-SM-4DK13-SM-4NFU9	10.1038/s41588-018-0200-2	35	Male	NA	35	Dead	SD	CTLA-4	NA	HiSeq 2500(Illumina)
MEL-IPI_Pat08-TP-NB-SM-4DK14-SM-4NFUA	10.1038/s41588-018-0200-2	73	Male	NA	4.66667	Alive	PD	CTLA-4	NA	HiSeq 2500(Illumina)
MEL-IPI_Pat100-TP-NT-SM-53U2D-SM-53U4M	10.1038/s41588-018-0200-2	71	Male	NA	12	Alive	PD	CTLA-4	NA	HiSeq 2500(Illumina)
MEL-IPI_Pat101-TP-NT-SM-4CU6O-SM-53U4N	10.1038/s41588-018-0200-2	75	Male	NA	9.6	Alive	PD	CTLA-4	NA	HiSeq 2500(Illumina)
MEL-IPI_Pat103-TP-NT-SM-4CU6Q-SM-53U4P	10.1038/s41588-018-0200-2	70	Male	NA	34.9333	Alive	CR/PR	CTLA-4	NA	HiSeq 2500(Illumina)
MEL-IPI_Pat105-TP-NT-SM-4CU6S-SM-53U4R	10.1038/s41588-018-0200-2	41	Male	NA	34.9	Dead	CR/PR	CTLA-4	NA	HiSeq 2500(Illumina)
MEL-IPI_Pat11-TP-NB-SM-4DK17-SM-4NFUD	10.1038/s41588-018-0200-2	67	Male	NA	26.3333	Dead	PD	CTLA-4	NA	HiSeq 2500(Illumina)
MEL-IPI_Pat110-TP-NT-SM-4CU6X-SM-4MGPO	10.1038/s41588-018-0200-2	76	Male	NA	10.6667	Alive	PD	CTLA-4	NA	HiSeq 2500(Illumina)
MEL-IPI_Pat111-TP-NT-SM-4CU6Y-SM-4MGPP	10.1038/s41588-018-0200-2	84	Male	NA	20.6	Alive	PD	CTLA-4	NA	HiSeq 2500(Illumina)
MEL-IPI_Pat113-TP-NT-SM-53U2Q-SM-4MGPR	10.1038/s41588-018-0200-2	68	Male	NA	10.0333	Alive	CR/PR	CTLA-4	NA	HiSeq 2500(Illumina)
MEL-IPI_Pat115-TP-NT-SM-5X2QS-SM-5X2RA	10.1038/s41588-018-0200-2	46	Male	NA	4.83333	Alive	PD	CTLA-4	NA	HiSeq 2500(Illumina)
MEL-IPI_Pat117-TP-NT-SM-5X2QU-SM-5X2RC	10.1038/s41588-018-0200-2	74	Male	NA	30.4667	Dead	CR/PR	CTLA-4	NA	HiSeq 2500(Illumina)
MEL-IPI_Pat119-TP-NT-SM-7459N-SM-7459Q	10.1038/s41588-018-0200-2	61	Male	NA	26.9333	Dead	PD	CTLA-4	NA	HiSeq 2500(Illumina)
MEL-IPI_Pat12-TP-NB-SM-7459O-SM-4NFUE	10.1038/s41588-018-0200-2	41	Male	NA	9.66667	Alive	PD	CTLA-4	NA	HiSeq 2500(Illumina)
MEL-IPI_Pat121-TP-NT-SM-7459K-SM-5X2RG	10.1038/s41588-018-0200-2	47	Male	NA	4.06667	Alive	PD	CTLA-4	NA	HiSeq 2500(Illumina)
MEL-IPI_Pat124-TP-NB-SM-7459L-SM-5VWHM	10.1038/s41588-018-0200-2	78	Male	NA	4.86667	Alive	PD	CTLA-4	NA	HiSeq 2500(Illumina)
MEL-IPI_Pat126-TP-NB-SM-5X2R4-SM-5VWHO	10.1038/s41588-018-0200-2	77	Male	NA	21.3667	Dead	CR/PR	CTLA-4	NA	HiSeq 2500(Illumina)
MEL-IPI_Pat128-TP-NB-SM-5X2R6-SM-5VWHQ	10.1038/s41588-018-0200-2	30	Male	NA	3.76667	Alive	PD	CTLA-4	NA	HiSeq 2500(Illumina)
MEL-IPI_Pat129-TP-NT-SM-5X2R7-SM-5X2RI	10.1038/s41588-018-0200-2	18	Male	NA	17.9667	Dead	PD	CTLA-4	NA	HiSeq 2500(Illumina)
MEL-IPI_Pat13-TP-NB-SM-4DK19-SM-4NFUF	10.1038/s41588-018-0200-2	78	Male	NA	24.4	Alive	PD	CTLA-4	NA	HiSeq 2500(Illumina)
MEL-IPI_Pat132-TP-NB-SM-5VWJA-SM-5VWHR	10.1038/s41588-018-0200-2	81	Male	NA	22.5333	Dead	CR/PR	CTLA-4	NA	HiSeq 2500(Illumina)
MEL-IPI_Pat133-TP-NB-SM-7A14Z-SM-5VWHS	10.1038/s41588-018-0200-2	75	Male	NA	18.0667	Alive	PD	CTLA-4	NA	HiSeq 2500(Illumina)
MEL-IPI_Pat134-TP-NB-SM-5VWJC-SM-5VWHT	10.1038/s41588-018-0200-2	73	Male	NA	10.0667	Alive	PD	CTLA-4	NA	HiSeq 2500(Illumina)
MEL-IPI_Pat139-TP-NB-SM-5VWJH-SM-5VWHY	10.1038/s41588-018-0200-2	58	Male	NA	3.3	Alive	PD	CTLA-4	NA	HiSeq 2500(Illumina)
MEL-IPI_Pat140-TP-NB-SM-5VWJI-SM-5VWHZ	10.1038/s41588-018-0200-2	62	Male	NA	16.4	Alive	PD	CTLA-4	NA	HiSeq 2500(Illumina)
MEL-IPI_Pat143-TP-NB-SM-7A156-SM-5VWI3	10.1038/s41588-018-0200-2	71	Male	NA	5.1	Alive	PD	CTLA-4	NA	HiSeq 2500(Illumina)
MEL-IPI_Pat144-TP-NB-SM-7A157-SM-5VWI4	10.1038/s41588-018-0200-2	65	Male	NA	29	Alive	CR/PR	CTLA-4	NA	HiSeq 2500(Illumina)
MEL-IPI_Pat147-TP-NB-SM-7A158-SM-5VWI7	10.1038/s41588-018-0200-2	63	Male	NA	7.46667	Alive	PD	CTLA-4	NA	HiSeq 2500(Illumina)
MEL-IPI_Pat15-TP-NB-SM-4DK1B-SM-4NFUH	10.1038/s41588-018-0200-2	32	Male	NA	1.66667	Alive	PD	CTLA-4	NA	HiSeq 2500(Illumina)
MEL-IPI_Pat151-TP-NB-SM-7A15A-SM-5VWIB	10.1038/s41588-018-0200-2	68	Male	NA	6.8	Alive	PD	CTLA-4	NA	HiSeq 2500(Illumina)
MEL-IPI_Pat159-TP-NB-SM-5VWK2-SM-5VWIJ	10.1038/s41588-018-0200-2	52	Male	NA	28.0667	Dead	PD	CTLA-4	NA	HiSeq 2500(Illumina)
MEL-IPI_Pat160-TP-NB-SM-5VWK3-SM-5VWIK	10.1038/s41588-018-0200-2	79	Male	NA	5.06667	Alive	PD	CTLA-4	NA	HiSeq 2500(Illumina)
MEL-IPI_Pat163-TP-NB-SM-5VWK6-SM-5VWIN	10.1038/s41588-018-0200-2	54	Male	NA	24.9667	Dead	PD	CTLA-4	NA	HiSeq 2500(Illumina)
MEL-IPI_Pat166-TP-NB-SM-7A15G-SM-5VWIQ	10.1038/s41588-018-0200-2	31	Male	NA	2.56667	Alive	NA	CTLA-4	NA	HiSeq 2500(Illumina)
MEL-IPI_Pat167-TP-NB-SM-7A15H-SM-5VWIR	10.1038/s41588-018-0200-2	50	Male	NA	13.6	Alive	PD	CTLA-4	NA	HiSeq 2500(Illumina)
MEL-IPI_Pat168-TP-NB-SM-5VOAX-SM-5VWIS	10.1038/s41588-018-0200-2	69	Male	NA	2.23333	Alive	NA	CTLA-4	NA	HiSeq 2500(Illumina)
MEL-IPI_Pat17-TP-NB-SM-4DK1D-SM-4NFUJ	10.1038/s41588-018-0200-2	44	Male	NA	6.83333	Alive	PD	CTLA-4	NA	HiSeq 2500(Illumina)
MEL-IPI_Pat170-TP-NB-SM-5VOAZ-SM-5VWIU	10.1038/s41588-018-0200-2	48	Male	NA	3.6	Alive	PD	CTLA-4	NA	HiSeq 2500(Illumina)
MEL-IPI_Pat171-TP-NB-SM-7A15J-SM-5VWIV	10.1038/s41588-018-0200-2	66	Male	NA	15.5333	Alive	PD	CTLA-4	NA	HiSeq 2500(Illumina)
MEL-IPI_Pat21-TP-NT-SM-4DK1H-SM-53U5G	10.1038/s41588-018-0200-2	81	Male	NA	22.5333	Alive	SD	CTLA-4	NA	HiSeq 2500(Illumina)
MEL-IPI_Pat27-TP-NB-SM-4DK1N-SM-4NFUT	10.1038/s41588-018-0200-2	61	Male	NA	45.9667	Dead	PD	CTLA-4	NA	HiSeq 2500(Illumina)
MEL-IPI_Pat32-TP-NT-SM-53U3T-SM-53U67	10.1038/s41588-018-0200-2	73	Male	NA	4.9	Alive	PD	CTLA-4	NA	HiSeq 2500(Illumina)
MEL-IPI_Pat39-TP-NB-SM-4DK1Z-SM-4NFV6	10.1038/s41588-018-0200-2	67	Male	NA	49.5667	Dead	CR/PR	CTLA-4	NA	HiSeq 2500(Illumina)
MEL-IPI_Pat41-TP-NT-SM-4DK22-SM-53U5O	10.1038/s41588-018-0200-2	64	Male	NA	4.26667	Alive	PD	CTLA-4	NA	HiSeq 2500(Illumina)
MEL-IPI_Pat45-TP-NT-SM-4DK26-SM-53U5R	10.1038/s41588-018-0200-2	69	Male	NA	2.96667	Alive	PD	CTLA-4	NA	HiSeq 2500(Illumina)
MEL-IPI_Pat47-TP-NT-SM-4DK28-SM-53U5U	10.1038/s41588-018-0200-2	78	Male	NA	36.8667	Dead	CR/PR	CTLA-4	NA	HiSeq 2500(Illumina)
MEL-IPI_Pat49-TP-NT-SM-4DK2A-SM-53U5W	10.1038/s41588-018-0200-2	36	Male	NA	34.4667	Dead	SD	CTLA-4	NA	HiSeq 2500(Illumina)
MEL-IPI_Pat50-TP-NT-SM-53U69-SM-53U5X	10.1038/s41588-018-0200-2	77	Male	NA	2.16667	Alive	PD	CTLA-4	NA	HiSeq 2500(Illumina)
MEL-IPI_Pat52-TP-NT-SM-4DK2D-SM-53U5Z	10.1038/s41588-018-0200-2	65	Male	NA	6.3	Alive	PD	CTLA-4	NA	HiSeq 2500(Illumina)
MEL-IPI_Pat54-TP-NB-SM-4DK2F-SM-4NFVL	10.1038/s41588-018-0200-2	73	Male	NA	6.93333	Alive	PD	CTLA-4	NA	HiSeq 2500(Illumina)
MEL-IPI_Pat56-TP-NB-SM-4DK2H-SM-4NFVN	10.1038/s41588-018-0200-2	68	Male	NA	7.83333	Alive	PD	CTLA-4	NA	HiSeq 2500(Illumina)
MEL-IPI_Pat57-TP-NB-SM-4DK2I-SM-4NFVO	10.1038/s41588-018-0200-2	69	Male	NA	8.33333	Alive	PD	CTLA-4	NA	HiSeq 2500(Illumina)
MEL-IPI_Pat59-TP-NB-SM-4DK2K-SM-4NFVQ	10.1038/s41588-018-0200-2	36	Male	NA	7.46667	Alive	PD	CTLA-4	NA	HiSeq 2500(Illumina)
MEL-IPI_Pat60-TP-NB-SM-4DK2L-SM-4NFVR	10.1038/s41588-018-0200-2	86	Male	NA	9.06667	Alive	PD	CTLA-4	NA	HiSeq 2500(Illumina)
MEL-IPI_Pat62-TP-NB-SM-4DK2N-SM-4NFVT	10.1038/s41588-018-0200-2	76	Male	NA	20.0667	Alive	PD	CTLA-4	NA	HiSeq 2500(Illumina)
MEL-IPI_Pat64-TP-NB-SM-4DK2P-SM-4NFVV	10.1038/s41588-018-0200-2	83	Male	NA	3.53333	Alive	PD	CTLA-4	NA	HiSeq 2500(Illumina)
MEL-IPI_Pat67-TP-NB-SM-4DK2S-SM-4NFVY	10.1038/s41588-018-0200-2	40	Male	NA	2.63333	Alive	PD	CTLA-4	NA	HiSeq 2500(Illumina)
MEL-IPI_Pat71-TP-NB-SM-4DK2W-SM-4NFW3	10.1038/s41588-018-0200-2	64	Male	NA	4.56667	Alive	PD	CTLA-4	NA	HiSeq 2500(Illumina)
MEL-IPI_Pat73-TP-NB-SM-4DK2Y-SM-4NFW5	10.1038/s41588-018-0200-2	71	Male	NA	14.7333	Alive	CR/PR	CTLA-4	NA	HiSeq 2500(Illumina)
MEL-IPI_Pat74-TP-NB-SM-4DK2Z-SM-4NFW6	10.1038/s41588-018-0200-2	73	Male	NA	6.43333	Alive	PD	CTLA-4	NA	HiSeq 2500(Illumina)
MEL-IPI_Pat76-TP-NB-SM-4DK32-SM-4NFW8	10.1038/s41588-018-0200-2	74	Male	NA	4.63333	Alive	PD	CTLA-4	NA	HiSeq 2500(Illumina)
MEL-IPI_Pat77-TP-NT-SM-4DK33-SM-53U63	10.1038/s41588-018-0200-2	22	Male	NA	34.3	Dead	CR/PR	CTLA-4	NA	HiSeq 2500(Illumina)
MEL-IPI_Pat79-TP-NB-SM-53U2S-SM-4NFWB	10.1038/s41588-018-0200-2	69	Male	NA	26.7	Alive	CR/PR	CTLA-4	NA	HiSeq 2500(Illumina)
MEL-IPI_Pat80-TP-NT-SM-4DK36-SM-53U53	10.1038/s41588-018-0200-2	47	Male	NA	24.1333	Alive	SD	CTLA-4	NA	HiSeq 2500(Illumina)
MEL-IPI_Pat83-TP-NT-SM-53U2W-SM-53U56	10.1038/s41588-018-0200-2	22	Male	NA	34.2333	Dead	PD	CTLA-4	NA	HiSeq 2500(Illumina)
MEL-IPI_Pat85-TP-NB-SM-53U2Y-SM-4NFWH	10.1038/s41588-018-0200-2	83	Male	NA	15.2667	Alive	PD	CTLA-4	NA	HiSeq 2500(Illumina)
MEL-IPI_Pat86-TP-NT-SM-4DK3C-SM-53U59	10.1038/s41588-018-0200-2	54	Male	NA	9.76667	Alive	SD	CTLA-4	NA	HiSeq 2500(Illumina)
MEL-IPI_Pat87-TP-NT-SM-4DK3D-SM-53U5A	10.1038/s41588-018-0200-2	47	Male	NA	36.4333	Dead	PD	CTLA-4	NA	HiSeq 2500(Illumina)
MEL-IPI_Pat90-TP-NB-SM-4DK3G-SM-4NFWM	10.1038/s41588-018-0200-2	59	Male	NA	33.5	Dead	CR/PR	CTLA-4	NA	HiSeq 2500(Illumina)
NR1867_T_N	10.1038/s41588-018-0200-2	NA	Male	NA	18.25	Dead	PD	CTLA-4	NA	HiSeq 2500(Illumina)
NR2137_T_N	10.1038/s41588-018-0200-2	NA	Male	NA	9.73333	Dead	PD	CTLA-4	NA	HiSeq 2500(Illumina)
NR3549_T_N	10.1038/s41588-018-0200-2	NA	Male	NA	6.08333	Dead	PD	CTLA-4	NA	HiSeq 2500(Illumina)
NR4018_T_N	10.1038/s41588-018-0200-2	NA	Male	NA	3.65	Dead	PD	CTLA-4	NA	HiSeq 2500(Illumina)
NR4045_T_N	10.1038/s41588-018-0200-2	NA	Male	NA	20.6833	Dead	PD	CTLA-4	NA	HiSeq 2500(Illumina)
NR4083_T_N	10.1038/s41588-018-0200-2	NA	Male	NA	2.8	Dead	PD	CTLA-4	NA	HiSeq 2500(Illumina)
NR4631_T_N	10.1038/s41588-018-0200-2	NA	Male	NA	6.08333	Dead	PD	CTLA-4	NA	HiSeq 2500(Illumina)
NR9445_T_N	10.1038/s41588-018-0200-2	NA	Male	NA	2.43333	Dead	PD	CTLA-4	NA	HiSeq 2500(Illumina)
NR9521_T_N	10.1038/s41588-018-0200-2	NA	Male	NA	32.85	Dead	PD	CTLA-4	NA	HiSeq 2500(Illumina)
PR12117_T_N	10.1038/s41588-018-0200-2	NA	Male	NA	19.4667	Alive	CR/PR	CTLA-4	NA	HiSeq 2500(Illumina)
PR4035_T_N	10.1038/s41588-018-0200-2	NA	Male	NA	51.1	Dead	CR/PR	CTLA-4	NA	HiSeq 2500(Illumina)
PR4046_T_N	10.1038/s41588-018-0200-2	NA	Male	NA	25.6667	Dead	CR/PR	CTLA-4	NA	HiSeq 2500(Illumina)
PR4077_T_N	10.1038/s41588-018-0200-2	NA	Male	NA	74.2167	Dead	CR/PR	CTLA-4	NA	HiSeq 2500(Illumina)
SD1494_T_N	10.1038/s41588-018-0200-2	NA	Male	NA	24.3333	Dead	SD	CTLA-4	NA	HiSeq 2500(Illumina)
SD5038_T_N	10.1038/s41588-018-0200-2	NA	Male	NA	14.6	Alive	SD	CTLA-4	NA	HiSeq 2500(Illumina)
SD5934_T_N	10.1038/s41588-018-0200-2	NA	Male	NA	19.4667	Alive	SD	CTLA-4	NA	HiSeq 2500(Illumina)
SD6336_T_N	10.1038/s41588-018-0200-2	NA	Male	NA	84.2333	Dead	SD	CTLA-4	NA	HiSeq 2500(Illumina)
pt211	10.1016/j.cell.2017.09.028	NA	NA	NA	38.1333	Alive	CR/PR	PD-1/PD-L1	Nivolumab	HiSeq 2000/2500(Illumina)
pt212	10.1016/j.cell.2017.09.028	NA	NA	M1b	21.1	Dead	SD	PD-1/PD-L1	Nivolumab	HiSeq 2000/2500(Illumina)
pt213	10.1016/j.cell.2017.09.028	NA	NA	M1c	7.4	Dead	PD	PD-1/PD-L1	Nivolumab	HiSeq 2000/2500(Illumina)
pt215	10.1016/j.cell.2017.09.028	NA	NA	M1c	38.3	Alive	CR/PR	PD-1/PD-L1	Nivolumab	HiSeq 2000/2500(Illumina)
pt216	10.1016/j.cell.2017.09.028	NA	NA	M0	8.63333	Dead	PD	PD-1/PD-L1	Nivolumab	HiSeq 2000/2500(Illumina)
pt217	10.1016/j.cell.2017.09.028	NA	NA	M1c	3.06667	Dead	PD	PD-1/PD-L1	Nivolumab	HiSeq 2000/2500(Illumina)
pt218	10.1016/j.cell.2017.09.028	NA	NA	M1a	8.53333	Dead	SD	PD-1/PD-L1	Nivolumab	HiSeq 2000/2500(Illumina)
pt219	10.1016/j.cell.2017.09.028	NA	NA	NA	27.9	Dead	PD	PD-1/PD-L1	Nivolumab	HiSeq 2000/2500(Illumina)
pt221	10.1016/j.cell.2017.09.028	NA	NA	NA	9.33333	Dead	PD	PD-1/PD-L1	Nivolumab	HiSeq 2000/2500(Illumina)
pt225	10.1016/j.cell.2017.09.028	NA	NA	M1c	1.9	Dead	PD	CTLA-4 plus PD-1/PD-L1	Ipilimumab+Nivolumab	HiSeq 2000/2500(Illumina)
pt226	10.1016/j.cell.2017.09.028	NA	NA	M1a	35.7667	Alive	CR/PR	PD-1/PD-L1	Nivolumab	HiSeq 2000/2500(Illumina)
pt231	10.1016/j.cell.2017.09.028	NA	NA	M1c	1.73333	Dead	SD	PD-1/PD-L1	Nivolumab	HiSeq 2000/2500(Illumina)
pt232	10.1016/j.cell.2017.09.028	NA	NA	M1c	4.96667	Alive	PD	PD-1/PD-L1	Nivolumab	HiSeq 2000/2500(Illumina)
pt233	10.1016/j.cell.2017.09.028	NA	NA	M1c	3.36667	Dead	PD	PD-1/PD-L1	Nivolumab	HiSeq 2000/2500(Illumina)
pt234	10.1016/j.cell.2017.09.028	NA	NA	M1b	31.7333	Alive	SD	PD-1/PD-L1	Nivolumab	HiSeq 2000/2500(Illumina)
pt235	10.1016/j.cell.2017.09.028	NA	NA	M1c	15.8333	Dead	PD	PD-1/PD-L1	Nivolumab	HiSeq 2000/2500(Illumina)
pt236	10.1016/j.cell.2017.09.028	NA	NA	NA	24.6667	Dead	PD	PD-1/PD-L1	Nivolumab	HiSeq 2000/2500(Illumina)
pt237	10.1016/j.cell.2017.09.028	NA	NA	M1c	9.1	Dead	PD	PD-1/PD-L1	Nivolumab	HiSeq 2000/2500(Illumina)
pt238	10.1016/j.cell.2017.09.028	NA	NA	M1a	35.1	Alive	CR/PR	PD-1/PD-L1	Nivolumab	HiSeq 2000/2500(Illumina)
pt239	10.1016/j.cell.2017.09.028	NA	NA	M1a	32.0333	Alive	PD	PD-1/PD-L1	Nivolumab	HiSeq 2000/2500(Illumina)
pt240	10.1016/j.cell.2017.09.028	NA	NA	M1c	3.8	Alive	PD	CTLA-4 plus PD-1/PD-L1	Ipilimumab+Nivolumab	HiSeq 2000/2500(Illumina)
pt242	10.1016/j.cell.2017.09.028	NA	NA	M1b	27.8	Alive	CR/PR	CTLA-4 plus PD-1/PD-L1	Ipilimumab+Nivolumab	HiSeq 2000/2500(Illumina)
pt244	10.1016/j.cell.2017.09.028	NA	NA	M1c	36.0333	Alive	SD	CTLA-4 plus PD-1/PD-L1	Ipilimumab+Nivolumab	HiSeq 2000/2500(Illumina)
pt245	10.1016/j.cell.2017.09.028	NA	NA	M1a	21.5333	Dead	SD	CTLA-4 plus PD-1/PD-L1	Ipilimumab+Nivolumab	HiSeq 2000/2500(Illumina)
pt246	10.1016/j.cell.2017.09.028	NA	NA	M1c	5.56667	Dead	SD	CTLA-4 plus PD-1/PD-L1	Ipilimumab+Nivolumab	HiSeq 2000/2500(Illumina)
pt252	10.1016/j.cell.2017.09.028	NA	NA	NA	36.4333	Alive	CR/PR	PD-1/PD-L1	Nivolumab	HiSeq 2000/2500(Illumina)
pt254	10.1016/j.cell.2017.09.028	NA	NA	M1a	7.56667	Dead	PD	CTLA-4 plus PD-1/PD-L1	Ipilimumab+Nivolumab	HiSeq 2000/2500(Illumina)
pt255	10.1016/j.cell.2017.09.028	NA	NA	M1b	23.9333	Dead	PD	CTLA-4 plus PD-1/PD-L1	Ipilimumab+Nivolumab	HiSeq 2000/2500(Illumina)
pt256	10.1016/j.cell.2017.09.028	NA	NA	M1c	34.8667	Alive	CR/PR	CTLA-4 plus PD-1/PD-L1	Ipilimumab+Nivolumab	HiSeq 2000/2500(Illumina)
pt257	10.1016/j.cell.2017.09.028	NA	NA	NA	27.5667	Alive	CR/PR	CTLA-4 plus PD-1/PD-L1	Ipilimumab+Nivolumab	HiSeq 2000/2500(Illumina)
pt259	10.1016/j.cell.2017.09.028	NA	NA	M1a	1.9	Alive	PD	CTLA-4 plus PD-1/PD-L1	Ipilimumab+Nivolumab	HiSeq 2000/2500(Illumina)
pt260	10.1016/j.cell.2017.09.028	NA	NA	M1c	15.8667	Dead	PD	CTLA-4 plus PD-1/PD-L1	Ipilimumab+Nivolumab	HiSeq 2000/2500(Illumina)
pt261	10.1016/j.cell.2017.09.028	NA	NA	M1c	14.4333	Dead	CR/PR	CTLA-4 plus PD-1/PD-L1	Ipilimumab+Nivolumab	HiSeq 2000/2500(Illumina)
pt262	10.1016/j.cell.2017.09.028	NA	NA	NA	28.8333	Alive	CR/PR	CTLA-4 plus PD-1/PD-L1	Ipilimumab+Nivolumab	HiSeq 2000/2500(Illumina)
pt266	10.1016/j.cell.2017.09.028	NA	NA	M1c	16.6333	Dead	SD	CTLA-4 plus PD-1/PD-L1	Ipilimumab+Nivolumab	HiSeq 2000/2500(Illumina)
pt267	10.1016/j.cell.2017.09.028	NA	NA	M1a	23.6	Dead	SD	PD-1/PD-L1	Nivolumab	HiSeq 2000/2500(Illumina)
pt268	10.1016/j.cell.2017.09.028	NA	NA	M1a	24.6	Alive	PD	PD-1/PD-L1	Nivolumab	HiSeq 2000/2500(Illumina)
pt273	10.1016/j.cell.2017.09.028	NA	NA	M1b	23.0667	Alive	SD	CTLA-4 plus PD-1/PD-L1	Ipilimumab+Nivolumab	HiSeq 2000/2500(Illumina)
pt274	10.1016/j.cell.2017.09.028	NA	NA	NA	18.0667	Dead	PD	PD-1/PD-L1	Nivolumab	HiSeq 2000/2500(Illumina)
pt275	10.1016/j.cell.2017.09.028	NA	NA	M1c	34.4	Alive	SD	CTLA-4 plus PD-1/PD-L1	Ipilimumab+Nivolumab	HiSeq 2000/2500(Illumina)
pt276	10.1016/j.cell.2017.09.028	NA	NA	M1b	28.0667	Alive	CR/PR	CTLA-4 plus PD-1/PD-L1	Ipilimumab+Nivolumab	HiSeq 2000/2500(Illumina)
pt278	10.1016/j.cell.2017.09.028	NA	NA	M1c	10.3667	Dead	SD	CTLA-4 plus PD-1/PD-L1	Ipilimumab+Nivolumab	HiSeq 2000/2500(Illumina)
pt279	10.1016/j.cell.2017.09.028	NA	NA	M1c	8.2	Alive	SD	PD-1/PD-L1	Nivolumab	HiSeq 2000/2500(Illumina)
pt280	10.1016/j.cell.2017.09.028	NA	NA	M1b	25.6667	Dead	CR/PR	PD-1/PD-L1	Nivolumab	HiSeq 2000/2500(Illumina)
pt281	10.1016/j.cell.2017.09.028	NA	NA	M1c	9.36667	Alive	SD	PD-1/PD-L1	Nivolumab	HiSeq 2000/2500(Illumina)
pt282	10.1016/j.cell.2017.09.028	NA	NA	M1c	0.666667	Dead	SD	PD-1/PD-L1	Nivolumab	HiSeq 2000/2500(Illumina)
pt284	10.1016/j.cell.2017.09.028	NA	NA	M1c	0.333333	Dead	SD	PD-1/PD-L1	Nivolumab	HiSeq 2000/2500(Illumina)
pt285	10.1016/j.cell.2017.09.028	NA	NA	M1a	15.7	Dead	SD	PD-1/PD-L1	Nivolumab	HiSeq 2000/2500(Illumina)
pt287	10.1016/j.cell.2017.09.028	NA	NA	NA	7.26667	Dead	SD	CTLA-4 plus PD-1/PD-L1	Ipilimumab+Nivolumab	HiSeq 2000/2500(Illumina)
pt290	10.1016/j.cell.2017.09.028	NA	NA	M1c	14.3	Dead	SD	CTLA-4 plus PD-1/PD-L1	Ipilimumab+Nivolumab	HiSeq 2000/2500(Illumina)
pt291	10.1016/j.cell.2017.09.028	NA	NA	M1c	15.4	Alive	SD	CTLA-4 plus PD-1/PD-L1	Ipilimumab+Nivolumab	HiSeq 2000/2500(Illumina)
pt292	10.1016/j.cell.2017.09.028	NA	NA	M1c	5.03333	Dead	PD	PD-1/PD-L1	Nivolumab	HiSeq 2000/2500(Illumina)
pt293	10.1016/j.cell.2017.09.028	NA	NA	M1a	30.1333	Alive	PD	CTLA-4 plus PD-1/PD-L1	Ipilimumab+Nivolumab	HiSeq 2000/2500(Illumina)
pt294	10.1016/j.cell.2017.09.028	NA	NA	M1c	9.06667	Dead	PD	CTLA-4 plus PD-1/PD-L1	Ipilimumab+Nivolumab	HiSeq 2000/2500(Illumina)
pt295	10.1016/j.cell.2017.09.028	NA	NA	NA	32.4667	Alive	SD	PD-1/PD-L1	Nivolumab	HiSeq 2000/2500(Illumina)
pt297	10.1016/j.cell.2017.09.028	NA	NA	M1a	28.1333	Dead	SD	PD-1/PD-L1	Nivolumab	HiSeq 2000/2500(Illumina)
pt298	10.1016/j.cell.2017.09.028	NA	NA	M1c	5.8	Dead	PD	CTLA-4 plus PD-1/PD-L1	Ipilimumab+Nivolumab	HiSeq 2000/2500(Illumina)
pt300	10.1016/j.cell.2017.09.028	NA	NA	NA	11.1	Dead	SD	CTLA-4 plus PD-1/PD-L1	Ipilimumab+Nivolumab	HiSeq 2000/2500(Illumina)
pt301	10.1016/j.cell.2017.09.028	NA	NA	M1c	28.3	Alive	PD	CTLA-4 plus PD-1/PD-L1	Ipilimumab+Nivolumab	HiSeq 2000/2500(Illumina)
pt302	10.1016/j.cell.2017.09.028	NA	NA	M1c	32.7	Alive	CR/PR	PD-1/PD-L1	Nivolumab	HiSeq 2000/2500(Illumina)
pt306	10.1016/j.cell.2017.09.028	NA	NA	M1c	24.9	Dead	SD	CTLA-4 plus PD-1/PD-L1	Ipilimumab+Nivolumab	HiSeq 2000/2500(Illumina)
pt308	10.1016/j.cell.2017.09.028	NA	NA	M1c	28	Dead	PD	CTLA-4 plus PD-1/PD-L1	Ipilimumab+Nivolumab	HiSeq 2000/2500(Illumina)
pt309	10.1016/j.cell.2017.09.028	NA	NA	M1a	27.8	Alive	CR/PR	CTLA-4 plus PD-1/PD-L1	Ipilimumab+Nivolumab	HiSeq 2000/2500(Illumina)
pt310	10.1016/j.cell.2017.09.028	NA	NA	NA	21.2	Alive	SD	PD-1/PD-L1	Nivolumab	HiSeq 2000/2500(Illumina)
pt311	10.1016/j.cell.2017.09.028	NA	NA	M1b	16.1333	Alive	PD	CTLA-4 plus PD-1/PD-L1	Ipilimumab+Nivolumab	HiSeq 2000/2500(Illumina)
pt312	10.1016/j.cell.2017.09.028	NA	NA	NA	27.2667	Alive	CR/PR	CTLA-4 plus PD-1/PD-L1	Ipilimumab+Nivolumab	HiSeq 2000/2500(Illumina)
pt314	10.1016/j.cell.2017.09.028	NA	NA	M1c	3.03333	Dead	PD	CTLA-4 plus PD-1/PD-L1	Ipilimumab+Nivolumab	HiSeq 2000/2500(Illumina)
pt316	10.1016/j.cell.2017.09.028	NA	NA	M1b	30.4333	Alive	SD	CTLA-4 plus PD-1/PD-L1	Ipilimumab+Nivolumab	HiSeq 2000/2500(Illumina)
