# Supplementary material for: SETBP1 mutation determines sensitivity to immune checkpoint inhibitors in melanoma and NSCLC
Source: Aging (Albany NY). 2023 Aug 2;15(15):7476–95. doi: 10.18632/aging.204913 (PMC10457048; doi:10.18632/aging.204913)
Supplement: Supplementary Table 4 [file aging-15-204913-s005.xlsx]

## Sheet: Table S4
	Supplementary Table 4. Clinical characteristics and immunotherapy information of 109 integrated NSCLC samples received ICI treatment.
Unique Subject Identifier	Sample ID	DOI	Age	Sex	Smoking status	Histology	PD-L1 expression	PFS (months)	PFS status	Response	Therapy target	Therapy drug	Sequencing platform
CA209012-13-156	1	10.1016/j.ccell.2018.03.018	70	Female	Former	LUSC	Weak	1.4127	Progressive	PD	PD-1 plus CTLA-4	Nivolumab+Ipilimumab	HiSeq 2000/2500/4000(Illumina)
CA209012-13-166	2	10.1016/j.ccell.2018.03.018	72	Male	Former	LUSC	Strong	6.8008	Progressive	PR	PD-1 plus CTLA-4	Nivolumab+Ipilimumab	HiSeq 2000/2500/4000(Illumina)
CA209012-13-170	3	10.1016/j.ccell.2018.03.018	61	Female	Never	LUSC	Strong	1.4784	Non-progressive	SD	PD-1 plus CTLA-4	Nivolumab+Ipilimumab	HiSeq 2000/2500/4000(Illumina)
CA209012-10-182	4	10.1016/j.ccell.2018.03.018	64	Male	current	LUSC	Weak	3.7782	Progressive	SD	PD-1 plus CTLA-4	Nivolumab+Ipilimumab	HiSeq 2000/2500/4000(Illumina)
CA209012-10-187	5	10.1016/j.ccell.2018.03.018	57	Male	Never	LUSC	Negative	7.5565	Progressive	SD	PD-1 plus CTLA-4	Nivolumab+Ipilimumab	HiSeq 2000/2500/4000(Illumina)
CA209012-13-195	6	10.1016/j.ccell.2018.03.018	67	Female	Former	LUSC	Negative	3.7125	Progressive	SD	PD-1 plus CTLA-4	Nivolumab+Ipilimumab	HiSeq 2000/2500/4000(Illumina)
CA209012-10-200	7	10.1016/j.ccell.2018.03.018	56	Male	Former	LUSC	Weak	38.6037	Non-progressive	PR	PD-1 plus CTLA-4	Nivolumab+Ipilimumab	HiSeq 2000/2500/4000(Illumina)
CA209012-10-211	8	10.1016/j.ccell.2018.03.018	58	Male	Former	LUSC	Strong	2.9897	Progressive	SD	PD-1 plus CTLA-4	Nivolumab+Ipilimumab	HiSeq 2000/2500/4000(Illumina)
CA209012-10-219	9	10.1016/j.ccell.2018.03.018	68	Female	Former	LUSC	Weak	7.7536	Progressive	SD	PD-1 plus CTLA-4	Nivolumab+Ipilimumab	HiSeq 2000/2500/4000(Illumina)
CA209012-13-234	10	10.1016/j.ccell.2018.03.018	72	Male	Former	LUSC	Weak	5.4209	Progressive	SD	PD-1 plus CTLA-4	Nivolumab+Ipilimumab	HiSeq 2000/2500/4000(Illumina)
CA209012-10-238	11	10.1016/j.ccell.2018.03.018	58	Female	Never	LUSC	Negative	7.8193	Progressive	SD	PD-1 plus CTLA-4	Nivolumab+Ipilimumab	HiSeq 2000/2500/4000(Illumina)
CA209012-10-239	12	10.1016/j.ccell.2018.03.018	82	Male	Former	LUSC	Weak	26.152	Non-progressive	PR	PD-1 plus CTLA-4	Nivolumab+Ipilimumab	HiSeq 2000/2500/4000(Illumina)
CA209012-10-252	13	10.1016/j.ccell.2018.03.018	76	Male	Never	LUSC	Unknown	23.9507	Progressive	SD	PD-1 plus CTLA-4	Nivolumab+Ipilimumab	HiSeq 2000/2500/4000(Illumina)
CA209012-13-260	14	10.1016/j.ccell.2018.03.018	43	Female	Former	LUSC	Weak	1.6756	Progressive	PD	PD-1 plus CTLA-4	Nivolumab+Ipilimumab	HiSeq 2000/2500/4000(Illumina)
CA209012-13-273	15	10.1016/j.ccell.2018.03.018	53	Female	current	LUSC	Negative	0.0329	Non-progressive	PD	PD-1 plus CTLA-4	Nivolumab+Ipilimumab	HiSeq 2000/2500/4000(Illumina)
CA209012-10-275	16	10.1016/j.ccell.2018.03.018	67	Male	Never	LUSC	Negative	3.6468	Progressive	SD	PD-1 plus CTLA-4	Nivolumab+Ipilimumab	HiSeq 2000/2500/4000(Illumina)
CA209012-10-285	17	10.1016/j.ccell.2018.03.018	68	Female	Never	LUSC	Strong	12.0903	Progressive	SD	PD-1 plus CTLA-4	Nivolumab+Ipilimumab	HiSeq 2000/2500/4000(Illumina)
CA209012-13-293	18	10.1016/j.ccell.2018.03.018	69	Female	Former	LUSC	Weak	29.7331	Non-progressive	PR	PD-1 plus CTLA-4	Nivolumab+Ipilimumab	HiSeq 2000/2500/4000(Illumina)
CA209012-13-296	19	10.1016/j.ccell.2018.03.018	59	Male	Former	LUSC	Weak	28.7803	Non-progressive	PR	PD-1 plus CTLA-4	Nivolumab+Ipilimumab	HiSeq 2000/2500/4000(Illumina)
CA209012-10-324	20	10.1016/j.ccell.2018.03.018	54	Male	current	LUSC	Weak	1.4456	Progressive	PD	PD-1 plus CTLA-4	Nivolumab+Ipilimumab	HiSeq 2000/2500/4000(Illumina)
CA209012-10-345	21	10.1016/j.ccell.2018.03.018	74	Female	Former	LUSC	Weak	21.5852	Non-progressive	CR	PD-1 plus CTLA-4	Nivolumab+Ipilimumab	HiSeq 2000/2500/4000(Illumina)
CA209012-10-346	22	10.1016/j.ccell.2018.03.018	72	Male	Former	LUSC	Negative	2.4969	Progressive	PD	PD-1 plus CTLA-4	Nivolumab+Ipilimumab	HiSeq 2000/2500/4000(Illumina)
CA209012-10-347	23	10.1016/j.ccell.2018.03.018	75	Female	Former	LUSC	Weak	7.9836	Progressive	PR	PD-1 plus CTLA-4	Nivolumab+Ipilimumab	HiSeq 2000/2500/4000(Illumina)
CA209012-10-352	24	10.1016/j.ccell.2018.03.018	85	Female	Former	LUSC	Negative	2.2669	Progressive	PD	PD-1 plus CTLA-4	Nivolumab+Ipilimumab	HiSeq 2000/2500/4000(Illumina)
CA209012-10-353	25	10.1016/j.ccell.2018.03.018	65	Male	Former	LUSC	Weak	22.1437	Progressive	SD	PD-1 plus CTLA-4	Nivolumab+Ipilimumab	HiSeq 2000/2500/4000(Illumina)
CA209012-13-358	26	10.1016/j.ccell.2018.03.018	60	Female	current	LUSC	Weak	23	Non-progressive	PR	PD-1 plus CTLA-4	Nivolumab+Ipilimumab	HiSeq 2000/2500/4000(Illumina)
CA209012-10-361	27	10.1016/j.ccell.2018.03.018	55	Male	current	LUSC	Unknown	4.1068	Progressive	SD	PD-1 plus CTLA-4	Nivolumab+Ipilimumab	HiSeq 2000/2500/4000(Illumina)
CA209012-13-375	28	10.1016/j.ccell.2018.03.018	77	Female	Former	LUSC	Strong	17.0513	Progressive	SD	PD-1 plus CTLA-4	Nivolumab+Ipilimumab	HiSeq 2000/2500/4000(Illumina)
CA209012-10-381	29	10.1016/j.ccell.2018.03.018	50	Female	current	LUSC	Negative	2.5955	Progressive	PD	PD-1 plus CTLA-4	Nivolumab+Ipilimumab	HiSeq 2000/2500/4000(Illumina)
CA209012-13-389	30	10.1016/j.ccell.2018.03.018	75	Male	Former	LUSC	Weak	21.191	Non-progressive	PR	PD-1 plus CTLA-4	Nivolumab+Ipilimumab	HiSeq 2000/2500/4000(Illumina)
CA209012-13-392	31	10.1016/j.ccell.2018.03.018	67	Female	current	LUSC	Weak	2.3326	Progressive	PD	PD-1 plus CTLA-4	Nivolumab+Ipilimumab	HiSeq 2000/2500/4000(Illumina)
CA209012-10-395	32	10.1016/j.ccell.2018.03.018	50	Female	Former	LUSC	Strong	18.9897	Non-progressive	CR	PD-1 plus CTLA-4	Nivolumab+Ipilimumab	HiSeq 2000/2500/4000(Illumina)
CA209012-16-401	33	10.1016/j.ccell.2018.03.018	74	Male	Former	LUSC	Negative	21.6181	Non-progressive	PR	PD-1 plus CTLA-4	Nivolumab+Ipilimumab	HiSeq 2000/2500/4000(Illumina)
CA209012-13-410	34	10.1016/j.ccell.2018.03.018	76	Male	Former	LUSC	Strong	22.34	Non-progressive	PR	PD-1 plus CTLA-4	Nivolumab+Ipilimumab	HiSeq 2000/2500/4000(Illumina)
CA209012-13-414	35	10.1016/j.ccell.2018.03.018	66	Female	Former	LUSC	Unknown	2.3326	Progressive	PD	PD-1 plus CTLA-4	Nivolumab+Ipilimumab	HiSeq 2000/2500/4000(Illumina)
CA209012-16-418	36	10.1016/j.ccell.2018.03.018	62	Female	Former	LUSC	Negative	13.3388	Progressive	SD	PD-1 plus CTLA-4	Nivolumab+Ipilimumab	HiSeq 2000/2500/4000(Illumina)
CA209012-10-424	37	10.1016/j.ccell.2018.03.018	57	Female	Former	LUSC	Strong	19.0226	Non-progressive	PR	PD-1 plus CTLA-4	Nivolumab+Ipilimumab	HiSeq 2000/2500/4000(Illumina)
CA209012-10-429	38	10.1016/j.ccell.2018.03.018	66	Male	Former	LUSC	Unknown	7.8193	Progressive	PR	PD-1 plus CTLA-4	Nivolumab+Ipilimumab	HiSeq 2000/2500/4000(Illumina)
CA209012-13-436	39	10.1016/j.ccell.2018.03.018	68	Female	Never	LUSC	Weak	0.03	Non-progressive	NE	PD-1 plus CTLA-4	Nivolumab+Ipilimumab	HiSeq 2000/2500/4000(Illumina)
CA209012-10-437	40	10.1016/j.ccell.2018.03.018	73	Male	Former	LUSC	Weak	8.115	Progressive	PR	PD-1 plus CTLA-4	Nivolumab+Ipilimumab	HiSeq 2000/2500/4000(Illumina)
CA209012-10-445	41	10.1016/j.ccell.2018.03.018	53	Male	Former	LUSC	Negative	13.5359	Non-progressive	CR	PD-1 plus CTLA-4	Nivolumab+Ipilimumab	HiSeq 2000/2500/4000(Illumina)
CA209012-10-446	42	10.1016/j.ccell.2018.03.018	59	Male	Former	LUSC	Weak	3.9425	Progressive	SD	PD-1 plus CTLA-4	Nivolumab+Ipilimumab	HiSeq 2000/2500/4000(Illumina)
CA209012-10-468	43	10.1016/j.ccell.2018.03.018	58	Female	Former	LUSC	Negative	5.0924	Progressive	SD	PD-1 plus CTLA-4	Nivolumab+Ipilimumab	HiSeq 2000/2500/4000(Illumina)
CA209012-13-212	44	10.1016/j.ccell.2018.03.018	63	Male	Former	LUSC	Weak	0.3285	Progressive	NE	PD-1 plus CTLA-4	Nivolumab+Ipilimumab	HiSeq 2000/2500/4000(Illumina)
CA209012-13-218	45	10.1016/j.ccell.2018.03.018	56	Male	Never	LUSC	Weak	2.2341	Progressive	NE	PD-1 plus CTLA-4	Nivolumab+Ipilimumab	HiSeq 2000/2500/4000(Illumina)
CA209012-14-228	46	10.1016/j.ccell.2018.03.018	69	Male	Former	LUSC	Strong	3.3183	Progressive	SD	PD-1 plus CTLA-4	Nivolumab+Ipilimumab	HiSeq 2000/2500/4000(Illumina)
CA209012-14-231	47	10.1016/j.ccell.2018.03.018	66	Male	Former	LUSC	Weak	2.1027	Progressive	PD	PD-1 plus CTLA-4	Nivolumab+Ipilimumab	HiSeq 2000/2500/4000(Illumina)
CA209012-13-235	48	10.1016/j.ccell.2018.03.018	51	Male	Never	LUSC	Negative	2.2998	Non-progressive	SD	PD-1 plus CTLA-4	Nivolumab+Ipilimumab	HiSeq 2000/2500/4000(Illumina)
CA209012-10-240	49	10.1016/j.ccell.2018.03.018	55	Female	Never	LUSC	Negative	11.6632	Progressive	SD	PD-1 plus CTLA-4	Nivolumab+Ipilimumab	HiSeq 2000/2500/4000(Illumina)
CA209012-13-244	50	10.1016/j.ccell.2018.03.018	63	Male	Former	LUSC	Negative	10.6119	Progressive	SD	PD-1 plus CTLA-4	Nivolumab+Ipilimumab	HiSeq 2000/2500/4000(Illumina)
CA209012-13-247	51	10.1016/j.ccell.2018.03.018	56	Female	Former	LUSC	Negative	29.9302	Non-progressive	PR	PD-1 plus CTLA-4	Nivolumab+Ipilimumab	HiSeq 2000/2500/4000(Illumina)
CA209012-4-254	52	10.1016/j.ccell.2018.03.018	67	Male	Former	LUSC	Negative	30.3244	Non-progressive	PR	PD-1 plus CTLA-4	Nivolumab+Ipilimumab	HiSeq 2000/2500/4000(Illumina)
CA209012-10-256	53	10.1016/j.ccell.2018.03.018	46	Female	Former	LUSC	Weak	1.3799	Progressive	PD	PD-1 plus CTLA-4	Nivolumab+Ipilimumab	HiSeq 2000/2500/4000(Illumina)
CA209012-16-281	54	10.1016/j.ccell.2018.03.018	42	Female	current	LUSC	Negative	5.1581	Progressive	SD	PD-1 plus CTLA-4	Nivolumab+Ipilimumab	HiSeq 2000/2500/4000(Illumina)
CA209012-16-286	55	10.1016/j.ccell.2018.03.018	71	Male	Former	LUSC	Negative	2.1027	Progressive	PD	PD-1 plus CTLA-4	Nivolumab+Ipilimumab	HiSeq 2000/2500/4000(Illumina)
CA209012-5-300	56	10.1016/j.ccell.2018.03.018	63	Female	Former	LUSC	Negative	6.5051	Progressive	SD	PD-1 plus CTLA-4	Nivolumab+Ipilimumab	HiSeq 2000/2500/4000(Illumina)
CA209012-8-316	57	10.1016/j.ccell.2018.03.018	61	Female	Former	LUSC	Negative	2.037	Progressive	PD	PD-1 plus CTLA-4	Nivolumab+Ipilimumab	HiSeq 2000/2500/4000(Illumina)
CA209012-10-325	58	10.1016/j.ccell.2018.03.018	56	Female	Never	LUSC	Weak	1.8727	Progressive	NE	PD-1 plus CTLA-4	Nivolumab+Ipilimumab	HiSeq 2000/2500/4000(Illumina)
CA209012-13-327	59	10.1016/j.ccell.2018.03.018	56	Female	Never	LUSC	Weak	2.3326	Progressive	PD	PD-1 plus CTLA-4	Nivolumab+Ipilimumab	HiSeq 2000/2500/4000(Illumina)
CA209012-14-329	60	10.1016/j.ccell.2018.03.018	73	Female	Former	LUSC	Weak	24.3121	Non-progressive	PR	PD-1 plus CTLA-4	Nivolumab+Ipilimumab	HiSeq 2000/2500/4000(Illumina)
CA209012-13-354	61	10.1016/j.ccell.2018.03.018	72	Male	Former	LUSC	Negative	1.7084	Progressive	NE	PD-1 plus CTLA-4	Nivolumab+Ipilimumab	HiSeq 2000/2500/4000(Illumina)
CA209012-13-370	62	10.1016/j.ccell.2018.03.018	87	Male	Never	LUSC	Weak	22.9979	Progressive	PR	PD-1 plus CTLA-4	Nivolumab+Ipilimumab	HiSeq 2000/2500/4000(Illumina)
CA209012-14-374	63	10.1016/j.ccell.2018.03.018	75	Male	Former	LUSC	Strong	21.8809	Non-progressive	PR	PD-1 plus CTLA-4	Nivolumab+Ipilimumab	HiSeq 2000/2500/4000(Illumina)
CA209012-13-380	64	10.1016/j.ccell.2018.03.018	74	Female	current	LUSC	Weak	20.0411	Non-progressive	PR	PD-1 plus CTLA-4	Nivolumab+Ipilimumab	HiSeq 2000/2500/4000(Illumina)
CA209012-10-384	65	10.1016/j.ccell.2018.03.018	69	Female	Never	LUSC	Negative	4.7639	Non-progressive	SD	PD-1 plus CTLA-4	Nivolumab+Ipilimumab	HiSeq 2000/2500/4000(Illumina)
CA209012-10-396	66	10.1016/j.ccell.2018.03.018	76	Male	Former	LUSC	Negative	0.0329	Non-progressive	NE	PD-1 plus CTLA-4	Nivolumab+Ipilimumab	HiSeq 2000/2500/4000(Illumina)
CA209012-13-399	67	10.1016/j.ccell.2018.03.018	71	Female	Former	LUSC	Weak	2.5298	Progressive	PD	PD-1 plus CTLA-4	Nivolumab+Ipilimumab	HiSeq 2000/2500/4000(Illumina)
CA209012-1-439	68	10.1016/j.ccell.2018.03.018	61	Male	Former	LUSC	Weak	7.9507	Progressive	SD	PD-1 plus CTLA-4	Nivolumab+Ipilimumab	HiSeq 2000/2500/4000(Illumina)
CA209012-13-442	69	10.1016/j.ccell.2018.03.018	67	Female	Former	LUSC	Weak	2.6283	Progressive	PD	PD-1 plus CTLA-4	Nivolumab+Ipilimumab	HiSeq 2000/2500/4000(Illumina)
CA209012-10-444	70	10.1016/j.ccell.2018.03.018	83	Male	Former	LUSC	Unknown	1.2813	Progressive	NE	PD-1 plus CTLA-4	Nivolumab+Ipilimumab	HiSeq 2000/2500/4000(Illumina)
CA209012-14-447	71	10.1016/j.ccell.2018.03.018	71	Female	Former	LUSC	Weak	3.5154	Progressive	SD	PD-1 plus CTLA-4	Nivolumab+Ipilimumab	HiSeq 2000/2500/4000(Illumina)
CA209012-1-454	72	10.1016/j.ccell.2018.03.018	47	Male	Never	LUSC	Weak	2.2998	Progressive	PD	PD-1 plus CTLA-4	Nivolumab+Ipilimumab	HiSeq 2000/2500/4000(Illumina)
CA209012-4-463	73	10.1016/j.ccell.2018.03.018	57	Female	Former	LUSC	Weak	16.46	Non-progressive	PR	PD-1 plus CTLA-4	Nivolumab+Ipilimumab	HiSeq 2000/2500/4000(Illumina)
CA209012-1-467	74	10.1016/j.ccell.2018.03.018	42	Male	Former	LUSC	Weak	7.9836	Progressive	SD	PD-1 plus CTLA-4	Nivolumab+Ipilimumab	HiSeq 2000/2500/4000(Illumina)
CA209012-14-472	75	10.1016/j.ccell.2018.03.018	51	Female	Former	LUSC	Negative	14.883	Non-progressive	CR	PD-1 plus CTLA-4	Nivolumab+Ipilimumab	HiSeq 2000/2500/4000(Illumina)
	AL4602	10.1126/science.aaa1348	59	Male	Former	LUAD	Strong	8.36667	Non-progressive	SD	PD-1	Pembrolizumab	HiSeq 2000(Illumina)
	AU5884	10.1126/science.aaa1348	64	Male	Former	LUAD	Weak	1.83333	Progressive	PD	PD-1	Pembrolizumab	HiSeq 2000(Illumina)
	BL3403	10.1126/science.aaa1348	73	Female	Former	LUAD	Weak	6.5	Progressive	SD	PD-1	Pembrolizumab	HiSeq 2000(Illumina)
	CA9903	10.1126/science.aaa1348	57	Male	Former	LUAD	Strong	14.5	Progressive	PR	PD-1	Pembrolizumab	HiSeq 2000(Illumina)
	CU9061	10.1126/science.aaa1348	57	Male	Former	LUSC	Weak	3.96667	Non-progressive	SD	PD-1	Pembrolizumab	HiSeq 2000(Illumina)
	DI6359	10.1126/science.aaa1348	61	Female	Current	LUAD	Strong	9.8	Non-progressive	PR	PD-1	Pembrolizumab	HiSeq 2000(Illumina)
	DM123062	10.1126/science.aaa1348	50	Male	Never	LUAD	Weak	1.9	Progressive	PD	PD-1	Pembrolizumab	HiSeq 2000(Illumina)
	FR9547	10.1126/science.aaa1348	65	Female	Current	LUAD	Strong	4.2	Non-progressive	PR	PD-1	Pembrolizumab	HiSeq 2000(Illumina)
	GR0134	10.1126/science.aaa1348	80	Male	Former	LUAD	Negative	8.3	Progressive	PR	PD-1	Pembrolizumab	HiSeq 2000(Illumina)
	GR4788	10.1126/science.aaa1348	59	Male	Current	LUSC	Negative	1.86667	Progressive	PD	PD-1	Pembrolizumab	HiSeq 2000(Illumina)
	HE3202	10.1126/science.aaa1348	63	Female	Former	LUAD	Strong	14.6667	Non-progressive	PR	PD-1	Pembrolizumab	HiSeq 2000(Illumina)
	JB112852	10.1126/science.aaa1348	60	Male	Never	LUAD	Negative	3.26667	Progressive	PD	PD-1	Pembrolizumab	HiSeq 2000(Illumina)
	KA3947	10.1126/science.aaa1348	64	Female	Former	LUAD	Strong	8.13333	Progressive	SD	PD-1	Pembrolizumab	HiSeq 2000(Illumina)
	LO3793	10.1126/science.aaa1348	62	Female	Former	LUAD	Weak	3.5	Progressive	SD	PD-1	Pembrolizumab	HiSeq 2000(Illumina)
	LO5004	10.1126/science.aaa1348	56	Female	Former	LUAD	Weak	6.3	Progressive	SD	PD-1	Pembrolizumab	HiSeq 2000(Illumina)
	M4945	10.1126/science.aaa1348	66	Male	Former	LUAD	Unknown	14.6	Non-progressive	PR	PD-1	Pembrolizumab	HiSeq 2000(Illumina)
	MA7027	10.1126/science.aaa1348	56	Male	Former	LUAD	Weak	1.8	Progressive	PD	PD-1	Pembrolizumab	HiSeq 2000(Illumina)
	NI9507	10.1126/science.aaa1348	41	Female	Current	LUAD	Weak	1.86667	Progressive	PD	PD-1	Pembrolizumab	HiSeq 2000(Illumina)
	R7495_2	10.1126/science.aaa1348	63	Male	Former	LUAD	Weak	1.36667	Progressive	PD	PD-1	Pembrolizumab	HiSeq 2000(Illumina)
	RH090935	10.1126/science.aaa1348	78	Female	Former	LUAD	Strong	10.4333	Non-progressive	PR	PD-1	Pembrolizumab	HiSeq 2000(Illumina)
	RI1933	10.1126/science.aaa1348	60	Female	Former	LUAD	Strong	16.6	Non-progressive	PR	PD-1	Pembrolizumab	HiSeq 2000(Illumina)
	RO3338	10.1126/science.aaa1348	71	Male	Former	LUAD	Weak	2.13333	Progressive	PD	PD-1	Pembrolizumab	HiSeq 2000(Illumina)
	SA9755	10.1126/science.aaa1348	63	Female	Former	NA	Weak	8.36667	Non-progressive	PR	PD-1	Pembrolizumab	HiSeq 2000(Illumina)
	SB010944	10.1126/science.aaa1348	68	Male	Never	LUSC	Unknown	27.3	Non-progressive	PR	PD-1	Pembrolizumab	HiSeq 2000(Illumina)
	SC0899	10.1126/science.aaa1348	64	Female	Current	LUAD	Weak	12.5667	Non-progressive	PR	PD-1	Pembrolizumab	HiSeq 2000(Illumina)
	SC6470	10.1126/science.aaa1348	59	Male	Current	LUAD	Weak	8.33333	Progressive	SD	PD-1	Pembrolizumab	HiSeq 2000(Illumina)
	SR070761	10.1126/science.aaa1348	51	Female	Former	LUSC	Negative	3.43333	Progressive	PD	PD-1	Pembrolizumab	HiSeq 2000(Illumina)
	TU0428	10.1126/science.aaa1348	66	Male	Current	LUAD	Negative	2.06667	Progressive	PD	PD-1	Pembrolizumab	HiSeq 2000(Illumina)
	VA1330	10.1126/science.aaa1348	71	Female	Former	LUAD	Unknown	4.13333	Progressive	SD	PD-1	Pembrolizumab	HiSeq 2000(Illumina)
	VA7859	10.1126/science.aaa1348	57	Female	Former	LUAD	Unknown	6.26667	Progressive	SD	PD-1	Pembrolizumab	HiSeq 2000(Illumina)
	WA7899	10.1126/science.aaa1348	49	Male	Never	LUAD	Strong	1.9	Progressive	PD	PD-1	Pembrolizumab	HiSeq 2000(Illumina)
	Y2087	10.1126/science.aaa1348	68	Female	Never	LUAD	Weak	8.33333	Progressive	SD	PD-1	Pembrolizumab	HiSeq 2000(Illumina)
	ZA6505	10.1126/science.aaa1348	76	Female	Never	LUAD	Negative	1.93333	Progressive	PD	PD-1	Pembrolizumab	HiSeq 2000(Illumina)
	ZA6965	10.1126/science.aaa1348	57	Female	Former	LUAD	Strong	4.43333	Non-progressive	PR	PD-1	Pembrolizumab	HiSeq 2000(Illumina)
