# Supplementary material for: SETBP1 mutation determines sensitivity to immune checkpoint inhibitors in melanoma and NSCLC
Source: Aging (Albany NY). 2023 Aug 2;15(15):7476–95. doi: 10.18632/aging.204913 (PMC10457048; doi:10.18632/aging.204913)
Supplement: Supplementary Table 5 [file aging-15-204913-s006.xlsx]

## Sheet: Table S5
Supplementary Table 5. Detailed genes used for ssGSEA in each infiltrated immune cell subtype.
Immune cell subtype	Gene
Activated B cells	AKNA	ARHGAP25	CCL21	CD180	CD2	CD27	CD37	CD38	CLEC17A	CLEC9A	CLECL1	FAIM3	FAM65B	GIMAP4	MAP4K1	PAX5	TNFRSF17	TRAF3IP3
Activated CD4	ANLN	BRIP1	BUB1B	CASC5	CCNB1	CCNB2	CCNE2	CEP55	CKAP2L	DLGAP5	DTL	E2F8	ECT2	ESCO2	EXO1	EXOC6	FBXO5	FIGNL1	HELLS	HMMR	IARS	KIF11	KIF18A	KIF20A	KNTC1	MAD2L1	MASTL	MTHFD2	NCAPG2	NCAPH	NEIL3	NUF2	PRC1	PSAT1	RTKN2
Activated CD8	ADRM1	AHSA1	C1GALT1C1	CCT5	CCT6B	CETN3	CSE1L	EIF2S1	GAL	GEMIN6	GPT2	KIAA0101	MND1	MPZL1	MRPS16	PCNA	PTRH2	RFC5	SPC25	TIMM13	TIMM8B	TK1	TUBB	TXNDC17
Central memory CD4	ADAM19	AHNAK	AIM2	COL4A1	CYLD	DPEP2	EPHA4	FYN	IL6R	IPCEF1	KLF10	MAL	MALT1	NXN	OPTN	PLCL2	PNRC1	SMAD4	SPOCK2	TRIB2	TXK
Central memory CD8	ADAM23	ATP2B4	BCL2L11	CD300A	CD80	CHN1	F2R	F8	GABARAPL1	GPR183	KLRK1	MSC	PYHIN1	RCAN2	RGS1	SLAMF1	SLFN11	ZEB2
Cytotoxic cells	BST2	BTN3A2	IL10RA	KLRB1	LAT2	LILRA2	SELL	SLAMF6	SLAMF7
DC	C1QC	CCDC88A	CCL13	CCL3L1	CCL3L3	CD300E	CD86	CLEC1A	CLEC4C	CLEC5A	CLIC2	CSF2RA	FAM49A	FCGR1A	FN1	FSTL1	GPR109B	GPX3	HLA-DQA2	INHBA	LGMN	NGFR	PDGFRL	PDPN	PRKAR2B	SIGLEC1	SIGLEC5	SLAMF9	STAB1	THBD	TNFAIP2	TTYH2	UBD	VCAM1
Effector memory CD4	BMI1	CASP3	CNOT10	COPB2	DARS	EXOSC9	EZH2	GDE1	IFT74	KLF5	NDUFB9	NUP205	SHCBP1	XRCC6
Effector memory CD8	APOBEC3H	ARHGAP10	ATP10D	BIRC3	C3AR1	CCL4	CD244	CD55	CFLAR	CMKLR1	DAPP1	DFNB31	DRAM1	EFNA5	FCGR2C	FCGR3A	FCRL6	FGR	GPR114	GZMH	HAPLN3	HLA-DMB	HLA-DPA1	HLA-DPB1	IFI16	IKZF2	IL15	IL2RB	JAKMIP1	KLRD1	LY96	NFKBIA	PLXNC1	PPP4R1	PTPN22	RGS18	SETD7	SH2D1B	SLA2	STXBP1	TLR5	TYROBP
Eosinophil	CCL24	CFD	CREB3	EGR1	EPX	FBXO16	HFE	HIVEP1	HIVEP2	MBP	PRNP	RNASE2	RNASE3	S100A4	SIGLEC8
iDC	ATP6V1A	C1QB	CHST11	CSF1	DPYD	FNDC3B	GRP	IL1RN	INPP5F	LPL	LPXN	MMD	PLAU	PLCB2	RAB38	RDX	RRAGD	TACSTD2	TGM2	TIMD4	TM7SF4
Immature B cells	BANK1	CD22	CYBB	ETS1	FAM129C	FCRL1	FCRL2	FCRL3	FCRL5	FCRLA	HDAC9	HLA-DOB	HLA-DQA1	HVCN1	KIAA0226	NCF1	NCF1B	P2RY10	PNOC	SP100	STAP1	TAGAP	TXNIP	ZCCHC2
Macrophages	AIF1	CCL1	CCL14	CCL26	CD163	CD300LB	CNR1	CNR2	CPM	CSF3R	ENG	FCAR	IGF1	IL34	L1CAM	LILRA1	LILRA5	LRP1	MS4A7	MS4A8B	TREM1	TREML1
Mast cells	ACSL4	ADAMTS3	ADCYAP1	ARHGAP15	ATP8B4	C19orf59	CASQ1	CLC	CMA1	CPA3	CTSG	DUSP14	EGR3	EMR1	FST	HDC	HEY1	KRT1	LXN	MEIS2	MS4A2	MS4A3	NLRP3	NTRK1	PLAT	PTGS1	PTGS2	RGS16	SCG2	SDPR	SERPINB2	SIGLEC14	SIGLEC6	SLC18A2	SLC24A3	TAL1	TARP	TIE1	TIMP1	TNFAIP6	TSPAN4	VAT1
mDC	ATP5O	CBX1	DNAJC15	ENSA	FOXN3	PRCP	SSB	TPMT
Memory B cells	AICDA	CCNA2	CDKN3	CLCN5	ENPP1	FCER1A	FCRL4	MYC	RUNX2	SORL1	SOX5	STAT5A	STAT5B	TLR9
Monocytes	ACTR3	ANXA5	ARPC2	ATP6V1B2	BASP1	CD300LF	DAZAP2	EIF4A1	EIF4G2	EMP3	FCN1	FTL	GABARAP	HIF1A	LITAF	NCOA4	OLR1	RAB1A	RHOA	SAT1	SDCBP	SRGN	TEK	TMBIM6	UBE2D3
Neutrophils	ABTB1	AMPD2	CAMP	EMR4P	FPR1	FPR2	GPR77	MAEA	PROK2	SEC14L1	SEPX1	SLC25A37	TNFSF14	TREML4	VNN2	XPO6
NK	AKT3	AXL	CDH2	CRTAM	CYTH1	FASLG	GRB2	KLRG1	LILRB5	LST1	MAPK4	NOTCH3	PIK3CG	PILRA	PLCG2	SIGLEC7	SIGLEC9
NK56 bright	C11orf75	DYNLL1	HCP5	HDGFRP2	KRT86	MLST8	MYL6B	TAX1BP3
NK56 dim	AKR7A3	CLTB	FAM27A	GLS2	GPRC5C	GRIN1	HLA-E	KIR2DS4	KLHL21	KRT80	MPL	PHRF1	PORCN	PQBP1	PSMC4	TEX264	UPP1
NKT	BTN2A2	CD101	GNLY	KIR2DL1	KIR2DL3	KIR3DL1	KIR3DL2	KLRC1	MICB	NCR1	NFATC2IP	TNFRSF11A
pDC	CBX6	DAB2	DDX17	HIGD1A	IDH3A	IL3RA	MAGED1	NUCB2	OFD1	OGT	PDIA4	SERTAD2	SIRPA	SPCS3	TMED2	TMX1	UGCG	ZDHHC17
T cells	BATF	BTLA	CCL11	CCL17	CCL22	CCL3	CCL5	CCL7	CCR1	CCR3	CCR4	CCR8	CD1A	CD1B	CD1C	CD1D	CD1E	CD247	CD28	CD3D	CD3E	CD3G	CD69	CD8A	CXCR1	CXCR4	CXCR5	CXCR6	FGFBP2	FLT3	FOSL1	GRAP2	HLA-DRA	HLA-DRB1	HLA-DRB5	HRH2	IFNG	IL10	IL12B	IL12RB1	IL12RB2	IL18R1	IL18RAP	IL1B	IL21	IL21R	IL24	IL26	IL27
TFH	B3GAT1	BCL6	CCR7	CD200	CD83	CD84	CDK5R1	FGF2	GPR18	PDCD1
TGD	ACP5	C1orf54	CARD8	CCL18	CD209	CD33	CECR1	CLEC10A	CLEC4A	CSF1R	FCER1G	FCGR2A	FCGR2B	FCGR3B	FGF7	FGL2	FPR3	GM2A	GPNMB	HCK	HK3	LIPA	MARCO	MMP12	MNDA	MRC1	MS4A6A	NPL	PLA2G7	PLEK	RAB23	RNASE6	SDC2	SLAMF8	SLC15A3	SLC38A6	SLC7A7	SPP1	TFEC	TM6SF1	TNFSF8	TREM2	TRPV2
Th1	ADAM8	CCR5	CD151	CD48	CD52	CD53	CD6	CD68	CD7	CD96	CD97	EBI3	GPR84	HAVCR2	ICAM1	ICAM3	IGSF6	IL12A	IL7R	IRF1	ITGA4	ITGAM	ITGAX	ITGB2	ITGB4	ITGB7	LTA	LTB	METRNL	P2RX5	PTPRC	SPN	TBX21	TLR6	TNFRSF1A	TNFRSF9	TRAT1
Th17	ABP1	B4GALNT4	C2CD4A	C2CD4B	CA2	CCDC65	CEACAM3	CHRM3	DOC2B	F12	FURIN	GPR25	IL17A	IL17C	IL17F	IL17RC	IL17RE	IL23A	ILDR1	LONRF3	LTK	MOCOS	SH2D6	TNIP2	TRAF3IP2	YBX2
Th2	ASB2	CALD1	CCR2	CSRP2	DAPK1	DLC1	DNAJC12	DUSP6	GATA3	GNAI1	HTR2B	LAMP3	NRP2	OSBPL1A	PDE4B	PHLDA1	PLA2G4A	RAB27B	RBMS3	RNF125	SIGLEC10	SKAP1	SMAD2	TMPRSS3	UBASH3A
Treg	CCL19	CD34	CD72	CTLA4	FOXP3	GADD45B	GEM	IL1RL1	IL9R	MADCAM1	MYH10	NCF2	RCSD1	RYR1	SELE	SELP	SFRP1	SIT1	TIGIT	TLR10	TLR2	TLR7	TLR8	TRAF1	WIPF1	TGFB1
MDSC	ADORA3	AG2	ARG1	BIN2	C1orf162	CAPS	CD117	CD11B	CD11C	CD124	CD14	CD15	CD163L1	CD1D1	CD21	CD23	CD274	CD31	CD35	CD40	CD43	CD44	CD66B	COX2	CR2	CTR9	EBP	FAM48A	FAM70B	FCER2	FCGRT	FERMT3	FLOT1	FLT1	GIMAP7	GLI4	GNA15	GPR34	GPSM3	HLA-DR	IDO	IKZF1	IL12	IL13	IL18BP	IL1R	IL4RA	INPP5D	ITGA3
[truncated: 37 more columns]
