# Supplementary material for: SETBP1 mutation determines sensitivity to immune checkpoint inhibitors in melanoma and NSCLC
Source: Aging (Albany NY). 2023 Aug 2;15(15):7476–95. doi: 10.18632/aging.204913 (PMC10457048; doi:10.18632/aging.204913)
Supplement: Supplementary Table 6 [file aging-15-204913-s007.xlsx]

## Sheet: Table S6
Supplementary Table 6. Detailed genes used for ssGSEA in each collected immune-related signature.
Immune signatures	Genes
Type 1 IFN response	MX1	TNFSF10	RSAD2	IFIT1	IFIT3	IFIT2	IRF7	DDX4	MX2	ISG20
Type 2 IFN response	GPR146	SELP	AHR
Cytolytic activity	GZMA	PRF1
T cell inflamed signature	CD274	CD276	CCL5	CD27	CD8A	CMKLR1	CXCL9	CXCR6	IDO1	LAG3	NKG7	PDCD1LG2	PSMB10	HLA-DQA1	HLA-DRB1	HLA-E	STAT1	TIGIT
IFNγ signature	GBP1	IFI16	IFI30	IFNG	IRF1	STAT1	TAP1	TAP2	PSMB9	IL15RA	GZMA	GZMB	CXCL10	CXCL9	TBX21
Stromal cells signature	DCN	PAPPA	SFRP4	THBS2	LY86	CXCL14	FOXF1	COL10A1	ACTG2	APBB1IP	SH2D1A	SULF1	MSR1	C3AR1	FAP	PTGIS	ITGBL1	BGN	CXCL12	ECM2	FCGR2A	MS4A4A	WISP1	COL1A2	MS4A6A	EDNRA	VCAM1	GPR124	SCUBE2	AIF1	HEPH	LUM	PTGER3	RUNX1T1	CDH5	PIK3R5	RAMP3	LDB2	COX7A1	EDIL3	DDR2	FCGR2B	LPPR4	COL15A1	AOC3	ITIH3	FMO1	PRKG1	PLXDC1
Immune cells signature	LCP2	LSP1	FYB	PLEK	HCK	IL10RA	LILRB1	NCKAP1L	LAIR1	NCF2	CYBB	PTPRC	IL7R	LAPTM5	CD53	EVI2B	SLA	ITGB2	GIMAP4	MYO1F	HCLS1	MNDA	IL2RG	CD48	AOAH	CCL5	LTB	GMFG	GIMAP6	GZMK	LST1	GPR65	LILRB2	WIPF1	CD37	BIN2	FCER1G	IKZF1	TYROBP	FGL2	FLI1	IRF8	ARHGAP15	SH2B3	TNFRSF1B	DOCK2	CD2	ARHGEF6	CORO1A
TLS	CCL19	CCL21	CXCL13	CXCL11	CCL8	CXCL10	CXCL9	CCL2	CCL3	CCL18	CCL5
B/P Metagene	IRF4	CD79A	POU2AF1	TNFRSF17	LAX1	CKAP2	IGHG1	IGHV1-69	IGKC	IGKV3-20	IGJ	LOC91316	FAM20B	IGKV4-1	NTN3	IGLJ3	IGLL3	IGKV1D-13	LOC652493	IGHM	IGHA1	LOC100130100	IGHV3-23	LOC100287723
T/NK Metagene	HLA-E	TNFAIP3	HCLS1	INPP5D	PIK3CD	CD48	MFNG	CD37	GMFG	SELL	FGL2	ARHGAP25	LCK	IL10RA	SASH3	PTPRCAP	CSF2RB	CD3E	GZMA	CD27	CCR7	GZMK	CCR2	LTB	PRKCB	CORO1A	TRAC	YME1L1	IL16	CD247	SH2D1A	GPR18	TRBC1	ITK	EVI2B	FYB	IL23A	PTPRC	CD3D	RAC2	NKG7	CTSW	KLRB1	XCL2	LPXN	GIMAP5	ARHGAP15	GIMAP6	PVRIG
M/D Metagene	CSF1R	HLA-DPA1	HLA-DPB1	CD4	HLA-DQB1	LST1	HLA-DMA	EVI2A	HLA-DRA	CYBB	HLA-DMB	DOCK2	ALOX5AP	LAT2	SRGN	HLA-DRB1	CD74	PTPRC	HLA-DQA1
Immune cell subsets	CD1C	CD2	CD3E	CD3D	CD3G	CD6	CD7	CD8A	CD8B	CD19	CD20	NKG7	KLRD1	KLRC1	KIR2DL4	CD24	CD38
Immune signaling molecules	SH2D1A	TIGIT	PTPRCAP	LAX1	SPIB	SLAMF1	TCL1A	TRAT1	THEMIS	LCK	SIT1	HSH2D	ITK	PTPRC	ZAP70	CRTAM	TIMD4	SIRPG	SLA2	DC247	TBX21	RHOH	HSH2D	TBET	POU2AF1	BLK	PAX5	BANK1	STAP1	IKZF3	TNFRSF17	MS4A1	SPIB	AIM2	SKAP1	IFI27	NLRP2	ZBP1	TIBAB	GZMA	CHIT1	MMP12	HAMP	ERAP2	MARCO	GBP5	SLAMF6	KLRK1	LILRA4
Cytokines chemokines	IFNG	FDCSP	CXCL9	CXCL10	CXCL11	CXCL13	CCL21	CCL19	CCL7	XCL1	XCL2	CCR4	CXCR5	CXCR3	DARC	IL7R	IL21R	IL22RA2
[truncated: 92 more columns]
